# Supplementary material for: The origin of sheep settlement in Western Mediterranean
Source: PubMed Central journal article supplement (PMC7311441; doi:10.1038/s41598-020-67246-5), 2020-06-23
Supplement: 41598_2020_67246_MOESM1_ESM.pdf [file 41598_2020_67246_MOESM1_ESM.pdf]

## **SUPPLEMENTARY INFORMATION**

### **The origin of sheep settlement in Western Mediterranean**

**Asmae Kandoussi, Ismail Boujenane, Clément Auger, Bruno Serranito, Agnès Germot, Mohammed Piro, Abderrahman Maftah, Bouabid Badaoui, and Daniel Petit**

# Supplementary Data S1: Supplementary tables

## 1. Access Numbers of sequences

| Access numbers for phylogenetic analysis |                 |                |                             |                 |                |
|------------------------------------------|-----------------|----------------|-----------------------------|-----------------|----------------|
| Breeds (Origin)                          | Population size | Access numbers | Breeds (Origin)             | Population size | Access numbers |
| Akkaraman<br>(Turkey)                    | 18              | AY091497.1     | Lacaune of Italy<br>(Italy) | 30              | KF228745.1     |
|                                          |                 | JN574132.1     |                             |                 | KF228746.1     |
|                                          |                 | JN574133.1     |                             |                 | KF228763.1     |
|                                          |                 | JN574134.1     |                             |                 | KF228766.1     |
|                                          |                 | JN574135.1     |                             |                 | KF228769.1     |
|                                          |                 | JN574136.1     |                             |                 | KF228770.1     |
|                                          |                 | JN574137.1     |                             |                 | KF228771.1     |
|                                          |                 | JN574138.1     |                             |                 | KF228772.1     |
|                                          |                 | JN574139.1     |                             |                 | KF228773.1     |
|                                          |                 | JN574140.1     |                             |                 | KF228774.1     |
|                                          |                 | JN574141.1     |                             |                 | KF228775.1     |
|                                          |                 | JN574142.1     |                             |                 | KF228776.1     |
|                                          |                 | JN574143.1     |                             |                 | KF228777.1     |
|                                          |                 | JN574144.1     |                             |                 | KF228779.1     |
|                                          |                 | JN574145.1     |                             |                 | KF228785.1     |
|                                          |                 | JN574146.1     |                             |                 | KF228786.1     |
|                                          |                 | JN574147.1     |                             |                 | KF228787.1     |
|                                          |                 | KF677049.1     |                             |                 | KF228788.1     |
| Churra Algarvia<br>(Portugal)            | 30              | DQ491580.1     |                             |                 | KF228789.1     |
|                                          |                 | DQ491589.1     |                             |                 | KF228790.1     |
|                                          |                 | DQ491591.1     |                             |                 | KF228791.1     |
|                                          |                 | DQ491646.1     |                             |                 | KF228792.1     |
|                                          |                 | DQ491649.1     |                             |                 | KF228793.1     |
|                                          |                 | DQ491652.1     |                             |                 | KF228794.1     |
|                                          |                 | DQ491654.1     |                             |                 | KF228795.1     |
|                                          |                 | DQ491656.1     |                             |                 | KF228796.1     |
|                                          |                 | DQ491658.1     |                             |                 | KF228797.1     |
|                                          |                 | DQ491664.1     |                             |                 | KF302447.1     |
|                                          |                 | DQ491678.1     |                             |                 | KF302453.1     |
|                                          |                 | DQ491687.1     |                             |                 | KF302460.1     |
|                                          |                 | DQ491699.1     | KF228640.1                  |                 |                |
|                                          |                 | DQ491706.1     | KF228641.1                  |                 |                |
|                                          |                 | DQ491708.1     | KF228642.1                  |                 |                |
|                                          |                 | DQ491712.1     | KF228643.1                  |                 |                |
|                                          |                 | DQ491713.1     | KF228644.1                  |                 |                |
|                                          |                 | DQ491714.1     | KF228645.1                  |                 |                |
|                                          |                 | DQ491719.1     | KF228646.1                  |                 |                |
|                                          |                 | DQ491720.1     | KF228647.1                  |                 |                |
|                                          |                 | DQ491722.1     | KF228648.1                  |                 |                |
|                                          |                 | DQ491723.1     | KF228649.1                  |                 |                |
|                                          |                 | DQ491724.1     | KF228650.1                  |                 |                |
|                                          |                 | DQ491725.1     | KF228651.1                  |                 |                |

|                             |            |            |                                 |    |            |
|-----------------------------|------------|------------|---------------------------------|----|------------|
|                             |            | DQ491728.1 | Merinizzata<br>Italiana (Italy) | 30 | KF228652.1 |
|                             |            | DQ491730.1 |                                 |    | KF228653.1 |
|                             |            | DQ491732.1 |                                 |    | KF228654.1 |
|                             |            | DQ491733.1 |                                 |    | KF228655.1 |
|                             |            | DQ491735.1 |                                 |    | KF228656.1 |
|                             |            | DQ491736.1 |                                 |    | KF228657.1 |
| Appenninica<br>(Italy)      | 29         | KF228617.1 | Morkaraman<br>(Turkey)          | 36 | KF228658.1 |
|                             |            | KF228618.1 |                                 |    | KF228659.1 |
|                             |            | KF228612.1 |                                 |    | KF228660.1 |
|                             |            | KF228613.1 |                                 |    | KF228661.1 |
|                             |            | KF228614.1 |                                 |    | KF228662.1 |
|                             |            | KF228615.1 |                                 |    | KF228663.1 |
|                             |            | KF228616.1 |                                 |    | KF228664.1 |
|                             |            | KF228619.1 |                                 |    | KF228665.1 |
|                             |            | KF228620.1 |                                 |    | KF228666.1 |
|                             |            | KF228621.1 |                                 |    | KF228667.1 |
|                             |            | KF228622.1 |                                 |    | KF302446.1 |
|                             |            | KF228623.1 |                                 |    | KF302459.1 |
|                             |            | KF228624.1 |                                 |    | HM236179.1 |
|                             |            | KF228625.1 |                                 |    | HM236181.1 |
|                             |            | KF228626.1 |                                 |    | JN574160.1 |
|                             |            | KF228627.1 |                                 |    | JN574161.1 |
|                             |            | KF228628.1 |                                 |    | JN574162.1 |
|                             |            | KF228629.1 |                                 |    | JN574163.1 |
|                             |            | KF228630.1 |                                 |    | JN574164.1 |
|                             |            | KF228631.1 |                                 |    | JN574165.1 |
|                             |            | KF228632.1 |                                 |    | JN574166.1 |
|                             |            | KF228633.1 |                                 |    | JN574167.1 |
|                             |            | KF228634.1 |                                 |    | KF677238.1 |
|                             |            | KF228636.1 |                                 |    | KF677239.1 |
|                             |            | KF228637.1 |                                 |    | KF677240.1 |
|                             |            | KF228638.1 |                                 |    | KF677241.1 |
| KF228639.1                  | KF677242.1 |            |                                 |    |            |
| KF302450.1                  | KF677243.1 |            |                                 |    |            |
| KF302451.1                  | KF677244.1 |            |                                 |    |            |
| Awassi (Pakistan)           | 3          | HM236182.1 |                                 |    | KF677245.1 |
|                             |            | JX235859.1 |                                 |    | KF677246.1 |
|                             |            | JX235861.1 |                                 |    | KF677247.1 |
| Churra Badana<br>(Portugal) | 18         | DQ491625.1 |                                 |    | KF677248.1 |
|                             |            | DQ491626.1 |                                 |    | KF677249.1 |
|                             |            | DQ491629.1 |                                 |    | KF677250.1 |
|                             |            | DQ491647.1 |                                 |    | KF677251.1 |
|                             |            | DQ491653.1 |                                 |    | KF677252.1 |
|                             |            | DQ491660.1 |                                 |    | KF677253.1 |
|                             |            | DQ491661.1 |                                 |    | KF677254.1 |
|                             |            | DQ491663.1 |                                 |    | KF677255.1 |
|                             |            | DQ491671.1 |                                 |    | KF677256.1 |
|                             |            | DQ491683.1 |                                 |    | KF677257.1 |
|                             |            | DQ491684.1 |                                 |    | KF677258.1 |
|                             |            | DQ491685.1 |                                 |    | KF677259.1 |

|                           |            |            |                   |            |            |
|---------------------------|------------|------------|-------------------|------------|------------|
|                           |            | DQ491688.1 |                   | KF677260.1 |            |
|                           |            | DQ491690.1 |                   | KF677261.1 |            |
|                           |            | DQ491692.1 |                   | KF677262.1 |            |
|                           |            | DQ491704.1 |                   | KF677263.1 |            |
|                           |            | DQ491721.1 |                   | KF677193.1 |            |
|                           |            | DQ491726.1 |                   | KF677199.1 |            |
| Baruwal (Nepal)           | 27         | KR610850.1 | Norduz (Turkey)   | 13         | KF677200.1 |
|                           |            | KR610851.1 |                   | KF677201.1 |            |
|                           |            | KR610852.1 |                   | KF677202.1 |            |
|                           |            | KR610853.1 |                   | KF677203.1 |            |
|                           |            | KR610854.1 |                   | KF677204.1 |            |
|                           |            | KR610855.1 |                   | KF677205.1 |            |
|                           |            | KR610856.1 |                   | KF677206.1 |            |
|                           |            | KR610857.1 |                   | KF677207.1 |            |
|                           |            | KR610858.1 |                   | KF677208.1 |            |
|                           |            | KR610859.1 |                   | KF677209.1 |            |
|                           |            | KR610860.1 |                   | KF677210.1 |            |
|                           |            | KR610861.1 |                   | DQ491579.1 |            |
|                           |            | KR610862.1 |                   | DQ491597.1 |            |
|                           | KR610863.1 | DQ491599.1 |                   |            |            |
|                           | KR610864.1 | DQ491604.1 |                   |            |            |
|                           | KR610865.1 | DQ491608.1 |                   |            |            |
|                           | KR610866.1 | DQ491610.1 |                   |            |            |
|                           | KR610867.1 | DQ491615.1 |                   |            |            |
|                           | KR610868.1 | DQ491617.1 |                   |            |            |
|                           | KR610869.1 | DQ491622.1 |                   |            |            |
|                           | KR610870.1 | DQ491623.1 |                   |            |            |
|                           | KR610871.1 | DQ491627.1 |                   |            |            |
|                           | KR610872.1 | DQ491628.1 |                   |            |            |
|                           | KR610873.1 | DQ491630.1 |                   |            |            |
|                           | KR610874.1 | DQ491632.1 |                   |            |            |
|                           | KR610875.1 | DQ491634.1 |                   |            |            |
|                           | KR610876.1 | DQ491637.1 |                   |            |            |
| Latxa Blonde Face (Spain) | 31         | KT879022.1 | Saloia (Portugal) | 30         | DQ491644.1 |
|                           |            | KT879030.1 |                   | DQ491648.1 |            |
|                           |            | KT879036.1 |                   | DQ491669.1 |            |
|                           |            | KT879040.1 |                   | DQ491670.1 |            |
|                           |            | KT879042.1 |                   | DQ491676.1 |            |
|                           |            | KT879043.1 |                   | DQ491677.1 |            |
|                           |            | KT879046.1 |                   | DQ491679.1 |            |
|                           |            | KT879083.1 |                   | DQ491691.1 |            |
|                           |            | KT879085.1 |                   | DQ491693.1 |            |
|                           |            | KT879095.1 |                   | DQ491694.1 |            |
|                           |            | KT879101.1 |                   | DQ491697.1 |            |
|                           |            | KT879118.1 |                   | DQ491703.1 |            |
|                           |            | KT879126.1 |                   | DQ491710.1 |            |
|                           | KT879134.1 | DQ491715.1 |                   |            |            |
| KT879138.1                | KF228824.1 |            |                   |            |            |
| KT879141.1                | KF228825.1 |            |                   |            |            |
| KT879147.1                | KF228826.1 |            |                   |            |            |

|                             |    |            |                         |            |
|-----------------------------|----|------------|-------------------------|------------|
|                             |    | KT879148.1 |                         | KF228827.1 |
|                             |    | KT879149.1 |                         | KF228828.1 |
|                             |    | KT879150.1 |                         | KF228829.1 |
|                             |    | KT879151.1 |                         | KF228830.1 |
|                             |    | KT879152.1 |                         | KF228831.1 |
|                             |    | KT879153.1 |                         | KF228832.1 |
|                             |    | KT879155.1 |                         | KF228833.1 |
|                             |    | KT879169.1 |                         | KF228834.1 |
|                             |    | KT879170.1 |                         | KF228835.1 |
|                             |    | KT879171.1 |                         | KF228836.1 |
|                             |    | KT879172.1 |                         | KF228837.1 |
|                             |    | KT879173.1 |                         | KF228838.1 |
|                             |    | KT879184.1 |                         | KF228839.1 |
|                             |    | KT879185.1 |                         | KF228840.1 |
|                             |    | KT879022.1 |                         | KF228841.1 |
|                             |    | KT879038.1 |                         | KF228842.1 |
|                             |    | KT879073.1 |                         | KF228843.1 |
|                             |    | KT879099.1 |                         | KF228844.1 |
|                             |    | KT879134.1 |                         | KF228845.1 |
|                             |    | KT879136.1 |                         | KF228846.1 |
|                             |    | KT879146.1 |                         | KF228847.1 |
|                             |    | KT879154.1 |                         | KF228848.1 |
|                             |    | KT879156.1 |                         | KF228849.1 |
|                             |    | KT879157.1 |                         | KF228850.1 |
|                             |    | KT879158.1 |                         | KF228851.1 |
|                             |    | KT879159.1 |                         | KF228852.1 |
|                             |    | KT879160.1 |                         | KF228853.1 |
|                             |    | KT879161.1 |                         | KF228586.1 |
|                             |    | KT879162.1 |                         | KF228587.1 |
|                             |    | KT879163.1 |                         | KF228588.1 |
|                             |    | KT879164.1 |                         | KF228589.1 |
|                             |    | KT879165.1 |                         | KF228590.1 |
|                             |    | KT879166.1 |                         | KF228591.1 |
|                             |    | KT879167.1 |                         | KF228592.1 |
|                             |    | KT879168.1 |                         | KF228593.1 |
|                             |    | KT879174.1 |                         | KF228594.1 |
|                             |    | KT879175.1 |                         | KF228595.1 |
|                             |    | KT879176.1 |                         | KF228596.1 |
|                             |    | KT879178.1 |                         | KF228597.1 |
|                             |    | KT879179.1 |                         | KF228598.1 |
|                             |    | KT879180.1 |                         | KF228599.1 |
|                             |    | KT879181.1 |                         | KF228600.1 |
|                             |    | KT879182.1 |                         | KF228601.1 |
|                             |    | KT879183.1 |                         | KF228602.1 |
|                             |    | KT879186.1 |                         | KF228603.1 |
|                             |    | DQ491706.1 |                         | KF228604.1 |
|                             |    | DQ491581.1 |                         | KF228605.1 |
|                             |    | DQ491583.1 |                         | KF228606.1 |
|                             |    | DQ491584.1 |                         | KF228607.1 |
|                             |    | DQ491588.1 |                         | KF228608.1 |
| Latxa Black Face<br>(Spain) | 31 |            | Sarda (Italy)           | 30         |
|                             |    |            | Sopravissana<br>(Italy) | 30         |

|                                   |    |            |                        |            |
|-----------------------------------|----|------------|------------------------|------------|
| Churra de Terra Quente (Portugal) | 25 | DQ491596.1 | Spanish Merino (Spain) | KF228609.1 |
|                                   |    | DQ491609.1 |                        | KF228610.1 |
|                                   |    | DQ491614.1 |                        | KF228611.1 |
|                                   |    | DQ491620.1 |                        | KF302449.1 |
|                                   |    | DQ491624.1 |                        | KF302454.1 |
|                                   |    | DQ491631.1 |                        | KF302456.1 |
|                                   |    | DQ491636.1 |                        | KF302458.1 |
|                                   |    | DQ491638.1 |                        | KF228823.1 |
|                                   |    | DQ491640.1 |                        | KF228822.1 |
|                                   |    | DQ491645.1 |                        | KF228821.1 |
|                                   |    | DQ491650.1 |                        | KF228820.1 |
|                                   |    | DQ491666.1 |                        | KF228819.1 |
|                                   |    | DQ491672.1 |                        | KF228818.1 |
|                                   |    | DQ491673.1 |                        | KF228817.1 |
|                                   |    | DQ491674.1 |                        | KF228816.1 |
|                                   |    | DQ491696.1 |                        | KF228815.1 |
|                                   |    | DQ491701.1 |                        | KF228814.1 |
|                                   |    | DQ491705.1 |                        | KF228813.1 |
|                                   |    | DQ491707.1 |                        | KF228812.1 |
|                                   |    | DQ491716.1 |                        | KF228811.1 |
| Campaniça (Portugal)              | 20 | DQ491595.1 | Spanish Merino (Spain) | KF228810.1 |
|                                   |    | DQ491602.1 |                        | KF228809.1 |
|                                   |    | DQ491611.1 |                        | KF228808.1 |
|                                   |    | DQ491612.1 |                        | KF228807.1 |
|                                   |    | DQ491618.1 |                        | KF228806.1 |
|                                   |    | DQ491619.1 |                        | KF228805.1 |
|                                   |    | DQ491621.1 |                        | KF228804.1 |
|                                   |    | DQ491655.1 |                        | KF228803.1 |
|                                   |    | DQ491657.1 |                        | KF228802.1 |
|                                   |    | DQ491659.1 |                        | KF228801.1 |
|                                   |    | DQ491662.1 |                        | KF228800.1 |
|                                   |    | DQ491667.1 |                        | KF228799.1 |
|                                   |    | DQ491668.1 |                        | KF228798.1 |
|                                   |    | DQ491680.1 |                        | MN229085   |
|                                   |    | DQ491681.1 |                        | MN229086   |
|                                   |    | DQ491695.1 |                        | MN229087   |
|                                   |    | DQ491698.1 |                        | MN229088   |
|                                   |    | DQ491709.1 |                        | MN229089   |
|                                   |    | DQ491729.1 |                        | MN229090   |
|                                   |    | DQ491731.1 |                        | MN229091   |
|                                   |    | KF228724.1 | Boujaad (Morocco)      | MN229092   |
|                                   |    | KF302445.1 |                        | MN229093   |
|                                   |    | KF302452.1 |                        | MN229094   |
|                                   |    | KF302462.1 |                        | MN229095   |
|                                   |    | KF228695.1 |                        | MN229096   |
|                                   |    | KF228696.1 |                        | MN229097   |
|                                   |    | KF228698.1 |                        | MN229098   |
|                                   |    | KF228699.1 |                        | MN229099   |
|                                   |    | KF228700.1 |                        | MN229100   |
|                                   |    | KF228703.1 |                        | MN229101   |
|                                   |    |            | 26                     |            |
|                                   |    |            | 31                     |            |

|                  |          |                 |                               |    |          |            |          |
|------------------|----------|-----------------|-------------------------------|----|----------|------------|----------|
| Comisana (Italy) | 30       | KF228704.1      | Blanche de Montagne (Morocco) | 32 | MN229102 |            |          |
|                  |          | KF228705.1      |                               |    | MN229103 |            |          |
|                  |          | KF228706.1      |                               |    | MN229104 |            |          |
|                  |          | KF228709.1      |                               |    | MN229105 |            |          |
|                  |          | KF228710.1      |                               |    | MN229106 |            |          |
|                  |          | KF228711.1      |                               |    | MN229107 |            |          |
|                  |          | KF228713.1      |                               |    | MN229108 |            |          |
|                  |          | KF228714.1      |                               |    | MN229109 |            |          |
|                  |          | KF228715.1      |                               |    | MN229110 |            |          |
|                  |          | KF228717.1      |                               |    | MN229111 |            |          |
|                  |          | KF228718.1      |                               |    | MN229112 |            |          |
|                  |          | KF228719.1      |                               |    | MN229113 |            |          |
|                  |          | KF228720.1      |                               |    | MN229114 |            |          |
|                  |          | KF228721.1      |                               |    | MN229115 |            |          |
|                  |          | KF228722.1      |                               |    | MN229116 |            |          |
|                  |          | KF228723.1      |                               |    | MN229117 |            |          |
|                  |          | KF228725.1      |                               |    | MN229118 |            |          |
|                  |          | KF228726.1      |                               |    | MN229119 |            |          |
|                  |          | KF228727.1      |                               |    | MN229120 |            |          |
|                  |          | KF228730.1      |                               |    | MN229121 |            |          |
|                  |          | Daglic (Turkey) |                               |    | 33       | JN574148.1 | MN229122 |
|                  |          |                 |                               |    |          | JN574149.1 | MN229123 |
|                  |          |                 |                               |    |          | JN574150.1 | MN229124 |
|                  |          |                 |                               |    |          | JN574151.1 | MN229125 |
|                  |          |                 |                               |    |          | JN574152.1 | MN229126 |
|                  |          |                 |                               |    |          | JN574153.1 | MN229127 |
|                  |          |                 |                               |    |          | JN574262.1 | MN229128 |
|                  |          |                 |                               |    |          | JN574263.1 | MN229129 |
|                  |          |                 |                               |    |          | JN574264.1 | MN229130 |
|                  |          |                 |                               |    |          | JN574285.1 | MN229131 |
| JN574286.1       | MN229132 |                 |                               |    |          |            |          |
| KF677071.1       | MN229133 |                 |                               |    |          |            |          |
| KF677072.1       | MN229134 |                 |                               |    |          |            |          |
| KF677073.1       | MN229135 |                 |                               |    |          |            |          |
| KF677074.1       | MN229136 |                 |                               |    |          |            |          |
| KF677075.1       | MN229137 |                 |                               |    |          |            |          |
| KF677076.1       | MN229138 |                 |                               |    |          |            |          |
| KF677077.1       | MN229139 |                 |                               |    |          |            |          |
| KF677078.1       | MN229140 |                 |                               |    |          |            |          |
| KF677079.1       | MN229141 |                 |                               |    |          |            |          |
| KF677080.1       | MN229142 |                 |                               |    |          |            |          |
| KF677081.1       | MN229143 |                 |                               |    |          |            |          |
| KF677082.1       | MN229144 |                 |                               |    |          |            |          |
| KF677083.1       | MN229145 |                 |                               |    |          |            |          |
| KF677084.1       | MN229146 |                 |                               |    |          |            |          |
| KF677085.1       | MN229147 |                 |                               |    |          |            |          |
| KF677086.1       | MN229148 |                 |                               |    |          |            |          |
| KF677087.1       | MN229149 |                 |                               |    |          |            |          |
| KF677088.1       | MN229150 |                 |                               |    |          |            |          |
| KF677089.1       | MN229151 |                 |                               |    |          |            |          |

|                              |    |            |                        |          |
|------------------------------|----|------------|------------------------|----------|
|                              |    | KF677090.1 |                        | MN229152 |
|                              |    | KF677091.1 |                        | MN229153 |
|                              |    | KF677092.1 |                        | MN229154 |
| Garze Tibetan<br>(Tibet)     | 17 | KU681175.1 | Beni-Guil<br>(Morocco) | MN229155 |
|                              |    | KU681176.1 |                        | MN229156 |
|                              |    | KU681177.1 |                        | MN229157 |
|                              |    | KU681179.1 |                        | MN229158 |
|                              |    | KU681180.1 |                        | MN229159 |
|                              |    | KU681181.1 |                        | MN229160 |
|                              |    | KU681182.1 |                        | MN229161 |
|                              |    | KU681183.1 |                        | MN229162 |
|                              |    | KU681184.1 |                        | MN229163 |
|                              |    | KU681185.1 |                        | MN229164 |
|                              |    | KU681186.1 |                        | MN229165 |
|                              |    | KU681187.1 |                        | MN229166 |
|                              |    | KU681188.1 |                        | MN229167 |
|                              |    | KU681189.1 |                        | MN229168 |
|                              |    | KU681190.1 |                        | MN229169 |
|                              |    | KU681191.1 |                        | MN229170 |
|                              |    | KU681192.1 |                        | MN229171 |
| Gentile De Puglia<br>(Italy) | 30 | KF228668.1 | D'man (Morocco)        | MN229172 |
|                              |    | KF228669.1 |                        | MN229173 |
|                              |    | KF228670.1 |                        | MN229174 |
|                              |    | KF228671.1 |                        | MN229175 |
|                              |    | KF228672.1 |                        | MN229176 |
|                              |    | KF228673.1 |                        | MN229177 |
|                              |    | KF228674.1 |                        | MN229178 |
|                              |    | KF228675.1 |                        | MN229179 |
|                              |    | KF228676.1 |                        | MN229180 |
|                              |    | KF228677.1 |                        | MN229181 |
|                              |    | KF228678.1 |                        | MN229182 |
|                              |    | KF228679.1 |                        | MN229183 |
|                              |    | KF228680.1 |                        | MN229184 |
|                              |    | KF228681.1 |                        | MN229185 |
|                              |    | KF228682.1 |                        | MN229186 |
|                              |    | KF228683.1 |                        | MN229187 |
|                              |    | KF228684.1 |                        | MN229188 |
|                              |    | KF228685.1 |                        | MN229189 |
|                              |    | KF228686.1 | MN229190               |          |
|                              |    | KF228687.1 | MN229191               |          |
|                              |    | KF228688.1 | MN229192               |          |
|                              |    | KF228689.1 | MN229193               |          |
|                              |    | KF228690.1 | MN229194               |          |
|                              |    | KF228691.1 | MN229195               |          |
|                              |    | KF228692.1 | MN229196               |          |
|                              |    | KF228693.1 | MN229197               |          |
|                              |    | KF228694.1 | MN229198               |          |
|                              |    | KF302448.1 | MN229199               |          |
|                              |    | KF302455.1 | MN229200               |          |
|                              |    | KF302457.1 | MN229201               |          |



|                            |    |            |                 |    |          |
|----------------------------|----|------------|-----------------|----|----------|
| German Merino<br>(Germany) | 29 | JN573922.1 | Sardi (Morocco) | 33 | MN229202 |
|                            |    | JN573923.1 |                 |    | MN229203 |
|                            |    | JN573924.1 |                 |    | MN229204 |
|                            |    | JN573925.1 |                 |    | MN229205 |
|                            |    | JN573926.1 |                 |    | MN229206 |
|                            |    | JN573927.1 |                 |    | MN229207 |
|                            |    | JN573928.1 |                 |    | MN229208 |
|                            |    | JN573929.1 |                 |    | MN229209 |
|                            |    | JN573930.1 |                 |    | MN229210 |
|                            |    | JN573931.1 |                 |    | MN229211 |
|                            |    | JN573932.1 |                 |    | MN229212 |
|                            |    | JN573933.1 |                 |    | MN229213 |
|                            |    | JN573934.1 |                 |    | MN229214 |
|                            |    | JN573935.1 |                 |    | MN229215 |
|                            |    | JN573936.1 |                 |    | MN229216 |
|                            |    | JN573937.1 |                 |    | MN229217 |
|                            |    | JN573938.1 |                 |    | MN229218 |
|                            |    | JN573939.1 |                 |    | MN229219 |
|                            |    | JN573940.1 |                 |    | MN229220 |
|                            |    | JN573941.1 |                 |    | MN229221 |
|                            |    | JN573942.1 |                 |    | MN229222 |
|                            |    | JN573943.1 |                 |    | MN229223 |
|                            |    | JN573944.1 |                 |    | MN229224 |
|                            |    | JN573945.1 |                 |    | MN229225 |
|                            |    | JN573946.1 |                 |    | MN229226 |
|                            |    | JN573947.1 |                 |    | MN229227 |
|                            |    | JN573948.1 |                 |    | MN229228 |
|                            |    | JN574174.1 |                 |    | MN229229 |
|                            |    | JN574209.1 |                 |    | MN229230 |
| Herik (Turkey)             | 15 | KF677119.1 |                 |    | MN229231 |
|                            |    | KF677120.1 |                 |    | MN229232 |
|                            |    | KF677121.1 |                 |    | MN229233 |
|                            |    | KF677122.1 |                 |    | MN229234 |
|                            |    | KF677123.1 |                 |    | MN229235 |
|                            |    | KF677124.1 |                 |    | MN229236 |
|                            |    | KF677125.1 |                 |    | MN229237 |
|                            |    | KF677126.1 |                 |    | MN229238 |
|                            |    | KF677127.1 |                 |    | MN229239 |
|                            |    | KF677128.1 |                 |    | MN229240 |
|                            |    | KF677129.1 |                 |    | MN229241 |
|                            |    | KF677130.1 |                 |    | MN229242 |
|                            |    | KF677131.1 |                 |    | MN229243 |
|                            |    | KF677132.1 |                 |    | MN229244 |
|                            |    | KF677133.1 |                 |    | MN229245 |
| Karakas (Turkey)           | 11 | DQ852282.1 |                 |    | MN229246 |
|                            |    | DQ852283.1 |                 |    | MN229247 |
|                            |    | DQ852284.1 |                 |    | MN229248 |
|                            |    | DQ852285.1 |                 |    | MN229249 |
|                            |    | DQ852286.1 |                 |    | MN229250 |
|                            |    | DQ852287.1 |                 |    | MN229251 |

|                      |    |            |                        |          |          |
|----------------------|----|------------|------------------------|----------|----------|
|                      |    | DQ852288.1 |                        | MN229252 |          |
|                      |    | DQ852289.1 |                        | MN229253 |          |
|                      |    | HM236176.1 |                        | MN229254 |          |
|                      |    | HM236177.1 |                        | MN229255 |          |
|                      |    | HM236178.1 |                        | MN229256 |          |
| Karayaka<br>(Turkey) | 30 | JN574154.1 | Timahdite<br>(Morocco) | 37       | MN229257 |
|                      |    | JN574155.1 |                        | MN229258 |          |
|                      |    | JN574156.1 |                        | MN229259 |          |
|                      |    | JN574157.1 |                        | MN229260 |          |
|                      |    | JN574158.1 |                        | MN229261 |          |
|                      |    | JN574159.1 |                        | MN229262 |          |
|                      |    | JN574265.1 |                        | MN229263 |          |
|                      |    | JN574266.1 |                        | MN229264 |          |
|                      |    | JN574267.1 |                        | MN229265 |          |
|                      |    | JN574268.1 |                        | MN229266 |          |
|                      |    | JN574269.1 |                        | MN229267 |          |
|                      |    | KF677024.1 |                        | MN229268 |          |
|                      |    | KF677025.1 |                        | MN229269 |          |
|                      |    | KF677026.1 |                        | MN229270 |          |
|                      |    | KF677028.1 |                        | MN229271 |          |
|                      |    | KF677029.1 |                        | MN229272 |          |
|                      |    | KF677030.1 |                        | MN229273 |          |
|                      |    | KF677031.1 |                        | MN229274 |          |
|                      |    | KF677032.1 |                        | MN229275 |          |
|                      |    | KF677033.1 |                        | MN229276 |          |
|                      |    | KF677034.1 |                        | MN229277 |          |
|                      |    | KF677035.1 |                        |          |          |
|                      |    | KF677036.1 |                        |          |          |
|                      |    | KF677037.1 |                        |          |          |
|                      |    | KF677038.1 |                        |          |          |
|                      |    | MG209458.1 |                        |          |          |
|                      |    | MG209461.1 |                        |          |          |
|                      |    | MG209462.1 |                        |          |          |
|                      |    | MG209465.1 |                        |          |          |
|                      |    | MG209466.1 |                        |          |          |

| Access numbers for mutation rate calculation |                |
|----------------------------------------------|----------------|
| Individuals                                  | Access numbers |
| Hap A 1                                      | HM236174.1     |
| Hap A 2                                      | HM236175.1     |
| Hap B 1                                      | HM236176.1     |
| Hap B 2                                      | HM236177.1     |
| Hap C 1                                      | HM236178.1     |
| Hap C 2                                      | HM236179.1     |
| Hap D 1                                      | HM236180.1     |
| Hap D 2                                      | HM236181.1     |
| Hap E 1                                      | HM236182.1     |
| Hap E 2                                      | HM236183.1     |
| Ovis musimon                                 | HM236184.1     |
| Ovis ammon ammon                             | HM236188.1     |
| Ovis ammon darwini                           | AF242347.1     |
| Ovis vignei 1                                | NC026064.1     |
| Ovis vignei 2                                | HM236186.1     |
| Ovis dalli                                   | NC039432.1     |
| Ovis nivicola                                | NC039431.1     |
| Ovis orientalis                              | HM042854.1     |

## 2. Indices of genetic diversity

|                        |     |     |    |    |     |       |          |          |         |            |               |            |    |            |          |          |     |          |    |         | Haplogroup membership |         |       |       |       |
|------------------------|-----|-----|----|----|-----|-------|----------|----------|---------|------------|---------------|------------|----|------------|----------|----------|-----|----------|----|---------|-----------------------|---------|-------|-------|-------|
|                        | N   | S   | P  | Sg | H   | Hd    | v(Hd)    | Std (Hd) | $\pi$   | v( $\pi$ ) | Std ( $\pi$ ) | Fu-Li's F* | p  | Fu-Li's D* | p        | Fu's Fs  | p   | Tajima D | p  | Shannon | A                     | B       | C     | D     | E     |
| Blanche de Montagne    | 32  | 44  | 16 | 28 | 24  | 0.97  | 0.0004   | 0.0190   | 0.0133  | 0.000003   | 0.0016        | -3.016     | *  | -2.943     | *        | -13.24   | *** | -1.766   | NS | 0.139   | 0.000                 | 96.875  | 3.125 | 0.000 | 0.000 |
| Boujaad                | 31  | 91  | 30 | 61 | 29  | 0.994 | 0.0001   | 0.0110   | 0.0226  | 0.000005   | 0.0023        | -3.280     | ** | -3.105     | *        | -18.224  | *** | -2.111   | *  | 0.239   | 0.000                 | 93.548  | 6.452 | 0.000 | 0.000 |
| Beni-Guil              | 31  | 66  | 24 | 42 | 29  | 0.996 | 0.0001   | 0.0090   | 0.0164  | 0.000007   | 0.0027        | -2.931     | *  | -2.741     | *        | -22.713  | *** | -1.953   | *  | 0.143   | 3.226                 | 96.774  | 0.000 | 0.000 | 0.000 |
| D'man                  | 29  | 41  | 14 | 27 | 21  | 0.963 | 0.0005   | 0.0230   | 0.0151  | 0.000001   | 0.0012        | -0.880     | NS | -0.634     | NS       | -7.424   | *   | -1.744   | NS | 0.000   | 0.000                 | 100.000 | 0.000 | 0.000 | 0.000 |
| Sardi                  | 33  | 76  | 42 | 34 | 30  | 0.994 | 0.0001   | 0.0090   | 0.0203  | 0.000010   | 0.0032        | -1.821     | NS | -1.457     | NS       | -18.582  | *** | -1.692   | NS | 0.229   | 6.060                 | 93.940  | 0.000 | 0.000 | 0.000 |
| Timahdite              | 37  | 56  | 27 | 29 | 32  | 0.988 | 0.0001   | 0.0110   | 0.0215  | 0.000008   | 0.0028        | -2.502     | NS | -2.242     | NS       | -25.845  | *** | -1.855   | *  | 0.281   | 0.000                 | 91.892  | 8.108 | 0.000 | 0.000 |
| Churra Algarvia        | 30  | 76  | 27 | 49 | 20  | 0.968 | 0.0003   | 0.0160   | 0.0207  | 0.000012   | 0.0035        | -1.046     | NS | -0.679     | NS       | -2.651   | NS  | -1.300   | NS | 0.389   | 3.333                 | 90.000  | 6.667 | 0.000 | 0.000 |
| Churra Badana          | 18  | 39  | 24 | 15 | 15  | 0.98  | 0.0006   | 0.0240   | 0.0142  | 0.000002   | 0.0013        | -0.671     | NS | -0.417     | NS       | -4.627   | *   | -0.970   | NS | 0.000   | 0.000                 | 1.000   | 0.000 | 0.000 | 0.000 |
| Latxa Blonde face      | 31  | 44  | 19 | 25 | 24  | 0.972 | 0.0004   | 0.0200   | 0.0092  | 0.000001   | 0.0181        | -2.420     | NS | -2.175     | NS       | -15.157  | *** | -1.800   | NS | 0.000   | 0.000                 | 1.000   | 0.000 | 0.000 | 0.000 |
| Latxa Black face       | 31  | 69  | 31 | 38 | 28  | 0.994 | 0.0010   | 0.0100   | 0.0147  | 0.000006   | 0.0024        | -2.393     | NS | -2.126     | NS       | -18.069  | *** | -1.817   | *  | 0.143   | 3.226                 | 96.774  | 0.000 | 0.000 | 0.000 |
| Churra de Terra Quente | 25  | 78  | 28 | 50 | 23  | 0.993 | 0.0002   | 0.0130   | 0.0178  | 0.000012   | 0.0035        | -2.570     | NS | -2.315     | NS       | -11.269  | *** | -1.909   | *  | 0.168   | 4.000                 | 96.000  | 0.000 | 0.000 | 0.000 |
| Campaniça              | 20  | 46  | 21 | 25 | 18  | 0.989 | 0.0004   | 0.0190   | 0.0133  | 0.000001   | 0.0012        | -1.766     | NS | -1.483     | NS       | -8.782   | *** | -1.590   | NS | 0.000   | 0.000                 | 100.000 | 0.000 | 0.000 | 0.000 |
| German Merino          | 29  | 70  | 25 | 45 | 29  | 1     | 0.0001   | 0.0090   | 0.0181  | 0.000016   | 0.0040        | -1.198     | NS | -0.660     | NS       | -23.981  | *** | -1.738   | NS | 0.000   | 0.000                 | 100.000 | 0.000 | 0.000 | 0.000 |
| Saloia                 | 30  | 64  | 39 | 25 | 28  | 0.995 | 0.0001   | 0.0100   | 0.0174  | 0.000014   | 0.0037        | -1.357     | NS | -0.924     | NS       | -18.953  | *** | -1.604   | NS | 0.245   | 6.667                 | 93.333  | 0.000 | 0.000 | 0.000 |
| Spanish Merino         | 26  | 62  | 24 | 38 | 26  | 1     | 0.0001   | 0.0110   | 0.0139  | 0.000001   | 0.0010        | -2.528     | NS | -2.267     | NS       | -22.036  | *** | -1.898   | NS | 0.000   | 0.000                 | 100.000 | 0.000 | 0.000 | 0.000 |
| Appenninica            | 29  | 58  | 30 | 28 | 22  | 0.98  | 0.0002   | 0.0140   | 0.0144  | 0.000001   | 0.0011        | -1.828     | NS | -1.527     | NS       | -8.197   | **  | -1.594   | NS | 0.000   | 0.000                 | 100.000 | 0.000 | 0.000 | 0.000 |
| Comisana               | 30  | 68  | 51 | 17 | 20  | 0.94  | 0.0010   | 0.0320   | 0.0328  | 0.000012   | 0.0035        | 0.176      | NS | 0.002      | NS       | -0.655   | NS  | 0.446    | NS | 0.580   | 26.667                | 73.333  | 0.000 | 0.000 | 0.000 |
| Gentile de Puglia      | 30  | 61  | 29 | 32 | 28  | 0.995 | 0.0001   | 0.0100   | 0.0147  | 0.000001   | 0.0011        | -2.178     | NS | -1.930     | NS       | -19.863  | *** | -1.669   | NS | 0.000   | 0.000                 | 100.000 | 0.000 | 0.000 | 0.000 |
| Lacaune of Italy       | 30  | 58  | 28 | 30 | 30  | 1     | 0.0001   | 0.0090   | 0.0125  | 0.000001   | 0.0009        | -2.158     | NS | -1.814     | NS       | -29.76   | *** | -1.854   | *  | 0.000   | 0.000                 | 100.000 | 0.000 | 0.000 | 0.000 |
| Merinizzata Italiana   | 30  | 79  | 39 | 40 | 26  | 0.989 | 0.0002   | 0.0130   | 0.0172  | 0.000008   | 0.0028        | -2.125     | NS | -1.773     | NS       | -12.742  | *** | -1.847   | *  | 0.146   | 3.333                 | 96.667  | 0.000 | 0.000 | 0.000 |
| Sarda                  | 30  | 48  | 25 | 23 | 22  | 0.977 | 0.0002   | 0.0140   | 0.0126  | 0.000001   | 0.0010        | -1.723     | NS | -1.455     | NS       | -8.867   | *** | -1.470   | NS | 0.000   | 0.000                 | 100.000 | 0.000 | 0.000 | 0.000 |
| Sopravissana           | 30  | 67  | 29 | 38 | 29  | 0.998 | 0.0001   | 0.0090   | 0.0149  | 0.000001   | 0.0008        | -2.436     | NS | -2.189     | NS       | -22.828  | *** | -1.802   | NS | 0.000   | 0.000                 | 100.000 | 0.000 | 0.000 | 0.000 |
| Akkaraman              | 18  | 86  | 57 | 29 | 18  | 1     | 0.0003   | 0.0190   | 0.0450  | 0.000009   | 0.0029        | 0.000      | NS | -0.166     | NS       | -4.665   | *   | 0.399    | NS | -       | -                     | -       | -     | -     | -     |
| Baruwal                | 27  | 67  | 25 | 42 | 11  | 0.883 | 0.0013   | 0.0360   | 0.0251  | 0.000023   | 0.0048        | -0.721     | NS | -0.707     | NS       | 4.523    | NS  | -0.414   | NS | -       | -                     | -       | -     | -     | -     |
| Daglic                 | 33  | 92  | 56 | 36 | 31  | 0.996 | 0.0001   | 0.0090   | 0.0500  | 0.000004   | 0.0020        | -0.901     | NS | -1.147     | NS       | -10.721  | *** | -0.011   | NS | -       | -                     | -       | -     | -     | -     |
| Garze Tibetan          | 17  | 66  | 48 | 18 | 11  | 0.912 | 0.0026   | 0.0510   | 0.0350  | 0.000026   | 0.0321        | 0.265      | NS | 0.167      | NS       | 2.256    | NS  | 0.379    | NS | -       | -                     | -       | -     | -     | -     |
| Herik                  | 15  | 69  | 48 | 21 | 14  | 0.99  | 0.0008   | 0.0280   | 0.0365  | 0.000014   | 0.0350        | 0.167      | NS | 0.129      | NS       | -2.089   | NS  | 0.187    | NS | -       | -                     | -       | -     | -     | -     |
| Karakas                | 11  | 60  | 54 | 6  | 5   | 0.818 | 0.0068   | 0.0830   | 0.0412  | 0.000026   | 0.0051        | 1.255      | NS | 1.204      | NS       | 8.269    | NS  | 0.831    | NS | -       | -                     | -       | -     | -     | -     |
| Karayaka               | 30  | 73  | 44 | 29 | 27  | 0.993 | 0.0001   | 0.0110   | 0.0510  | 0.000006   | 0.0025        | -0.831     | NS | -1.039     | NS       | -8.552   | *   | -0.026   | NS | -       | -                     | -       | -     | -     | -     |
| Morkaraman             | 36  | 89  | 58 | 31 | 32  | 0.992 | 0.0001   | 0.0090   | 0.0493  | 0.000003   | 0.0018        | -0.532     | NS | -0.765     | NS       | -9.298   | *   | 0.150    | NS | -       | -                     | -       | -     | -     | -     |
| Norduz                 | 13  | 78  | 52 | 26 | 13  | 1     | 0.0009   | 0.0300   | 0.0399  | 0.000030   | 0.0055        | -0.036     | NS | 0.035      | NS       | -2.707   | NS  | -0.212   | NS | -       | -                     | -       | -     | -     | -     |
| Moroccan group 1       | 119 | 107 | 56 | 51 | 87  | 0.99  | 0.00001  | 0.003    | 0.01682 | 0.0000008  | 0.00088       | -3.77092   | ** | -3.9896    | **       | -34.052  | *** | -2.05071 | *  | -       | -                     | -       | -     | -     | -     |
| Moroccan group 2       | 32  | 68  | 29 | 39 | 32  | 1     | 0.00006  | 0.008    | 0.02005 | 0.0000018  | 0.00135       | -2.73125   | *  | -2.48107   | .1>p>0.0 | -30.699  | *** | -1.96395 | *  | -       | -                     | -       | -     | -     | -     |
| Iberian group          | 119 | 134 | 73 | 61 | 105 | 0.997 | 0.000003 | 0.0017   | 0.01372 | 0.0000008  | 0.00091       | -3.61814   | ** | -3.66164   | **       | -152.842 | *** | -2.19728 | ** | -       | -                     | -       | -     | -     | -     |
| Italian group          | 119 | 139 | 94 | 45 | 104 | 0.998 | 0.000002 | 0.0014   | 0.01643 | 0.0000013  | 0.00112       | -2.4585    | *  | -2.02597   | .1>p>0.0 | -146.043 | *** | -2.07911 | *  | -       | -                     | -       | -     | -     | -     |

3. Newik-Extra results

Matrix of Numbers of Similarities between breeds

|                        | Boujaad | ch de Mont | Beni-Guil | D'man | Sardi | Timahdite | hurra Algarv | hurra Badar | Latxa Blonde Fa | Latxa Black Fa | Campaniça | de Terra | German Meri | Saloia | banish Meri | Appenninica | Comisana | Intile de Pug | Lacaune of It | Merinzata Ital | Sarda | Sopravissana | Akkaraman | Awassi | Baruwal | Daglic | Garze Tibeta | Herik | Karakas | Karayaka | Morkaraman | Norduz |
|------------------------|---------|------------|-----------|-------|-------|-----------|--------------|-------------|-----------------|----------------|-----------|----------|-------------|--------|-------------|-------------|----------|---------------|---------------|----------------|-------|--------------|-----------|--------|---------|--------|--------------|-------|---------|----------|------------|--------|
| Boujaad                | 14      | 0          | 1         | 0     | 2     | 3         | 2            | 0           | 0               | 0              | 0         | 0        | 0           | 0      | 0           | 0           | 0        | 0             | 1             | 1              | 0     | 0            | 1         | 0      | 0       | 0      | 0            | 1     | 0       | 0        | 0          | 0      |
| Blanch de Montagne     | 0       | 8          | 0         | 16    | 5     | 6         | 0            | 1           | 0               | 2              | 0         | 1        | 0           | 1      | 0           | 0           | 0        | 2             | 0             | 1              | 0     | 0            | 0         | 0      | 0       | 0      | 0            | 1     | 0       | 0        | 0          | 0      |
| Beni-Guil              | 1       | 0          | 4         | 3     | 3     | 2         | 0            | 0           | 1               | 0              | 0         | 0        | 2           | 0      | 0           | 0           | 0        | 0             | 1             | 0              | 1     | 0            | 1         | 0      | 0       | 0      | 0            | 0     | 0       | 0        | 0          | 0      |
| D'man                  | 0       | 16         | 3         | 46    | 13    | 20        | 0            | 0           | 0               | 0              | 0         | 0        | 0           | 0      | 0           | 0           | 0        | 0             | 0             | 0              | 0     | 0            | 0         | 0      | 0       | 0      | 0            | 0     | 0       | 0        | 0          | 0      |
| Sardi                  | 2       | 5          | 3         | 13    | 10    | 3         | 1            | 0           | 0               | 0              | 0         | 2        | 1           | 0      | 1           | 1           | 0        | 0             | 2             | 0              | 2     | 0            | 0         | 0      | 0       | 0      | 0            | 0     | 0       | 1        | 0          | 0      |
| Timahdite              | 3       | 6          | 2         | 20    | 3     | 14        | 1            | 0           | 2               | 1              | 0         | 0        | 0           | 1      | 0           | 0           | 2        | 1             | 2             | 1              | 0     | 1            | 0         | 0      | 0       | 0      | 0            | 0     | 0       | 0        | 0          | 0      |
| Churra Algarvia        | 2       | 0          | 0         | 0     | 1     | 1         | 32           | 1           | 0               | 0              | 0         | 1        | 0           | 1      | 0           | 0           | 0        | 0             | 0             | 0              | 0     | 0            | 0         | 0      | 0       | 0      | 0            | 0     | 0       | 0        | 0          | 1      |
| Churra Badana          | 0       | 1          | 0         | 0     | 0     | 0         | 1            | 6           | 1               | 0              | 0         | 2        | 0           | 2      | 0           | 0           | 0        | 0             | 0             | 0              | 1     | 0            | 0         | 0      | 0       | 0      | 0            | 0     | 0       | 0        | 0          | 0      |
| Latxa Blonde Face      | 0       | 0          | 1         | 0     | 0     | 2         | 0            | 1           | 6               | 3              | 0         | 0        | 0           | 3      | 0           | 2           | 0        | 0             | 2             | 0              | 0     | 0            | 0         | 0      | 0       | 0      | 1            | 0     | 0       | 0        | 0          | 0      |
| Latxa Black Face       | 0       | 2          | 0         | 0     | 0     | 1         | 0            | 0           | 3               | 8              | 1         | 0        | 0           | 1      | 1           | 0           | 1        | 0             | 0             | 0              | 0     | 0            | 0         | 0      | 0       | 0      | 1            | 0     | 0       | 0        | 0          | 1      |
| Campaniça              | 0       | 0          | 0         | 0     | 0     | 0         | 0            | 0           | 0               | 1              | 4         | 1        | 1           | 1      | 0           | 0           | 1        | 1             | 1             | 0              | 0     | 1            | 0         | 0      | 0       | 0      | 0            | 0     | 0       | 2        | 0          | 0      |
| Churra de Terra Quente | 0       | 1          | 0         | 0     | 2     | 0         | 1            | 2           | 0               | 0              | 1         | 6        | 0           | 2      | 1           | 0           | 0        | 0             | 0             | 1              | 0     | 0            | 0         | 0      | 0       | 0      | 0            | 0     | 0       | 0        | 0          | 1      |
| German Merino          | 0       | 0          | 2         | 0     | 1     | 0         | 0            | 0           | 0               | 0              | 1         | 0        | 6           | 0      | 1           | 1           | 0        | 1             | 2             | 1              | 1     | 0            | 0         | 0      | 0       | 2      | 0            | 0     | 0       | 0        | 1          | 0      |
| Saloia                 | 0       | 1          | 0         | 0     | 0     | 1         | 1            | 2           | 3               | 0              | 1         | 2        | 0           | 4      | 0           | 0           | 1        | 1             | 2             | 2              | 0     | 1            | 0         | 0      | 0       | 0      | 0            | 1     | 0       | 0        | 0          | 0      |
| Spanish Merino         | 0       | 0          | 0         | 0     | 1     | 0         | 0            | 0           | 0               | 1              | 0         | 1        | 1           | 0      | 0           | 0           | 0        | 2             | 1             | 0              | 0     | 0            | 0         | 0      | 0       | 0      | 0            | 1     | 0       | 0        | 0          | 0      |
| Appenninica            | 0       | 0          | 0         | 0     | 1     | 0         | 0            | 0           | 2               | 1              | 0         | 0        | 1           | 0      | 0           | 12          | 0        | 0             | 2             | 2              | 1     | 1            | 0         | 0      | 0       | 0      | 1            | 0     | 0       | 0        | 0          | 0      |
| Comisana               | 0       | 0          | 0         | 0     | 1     | 2         | 0            | 0           | 0               | 0              | 1         | 0        | 0           | 1      | 0           | 0           | 54       | 1             | 2             | 0              | 1     | 1            | 0         | 0      | 0       | 0      | 0            | 0     | 0       | 0        | 0          | 0      |
| Gentile de Puglia      | 0       | 2          | 0         | 0     | 0     | 1         | 0            | 0           | 0               | 1              | 1         | 0        | 1           | 1      | 2           | 0           | 1        | 6             | 2             | 1              | 1     | 4            | 0         | 0      | 0       | 0      | 0            | 0     | 0       | 0        | 0          | 0      |
| Lacaune of Italy       | 1       | 0          | 1         | 0     | 0     | 2         | 0            | 0           | 2               | 0              | 1         | 0        | 2           | 2      | 1           | 2           | 2        | 2             | 4             | 1              | 0     | 0            | 0         | 0      | 0       | 0      | 0            | 0     | 0       | 0        | 1          | 0      |
| Merinzata Italiana     | 1       | 1          | 0         | 0     | 2     | 1         | 0            | 0           | 0               | 0              | 0         | 1        | 1           | 2      | 0           | 2           | 0        | 1             | 1             | 12             | 1     | 0            | 0         | 0      | 0       | 0      | 0            | 0     | 0       | 0        | 0          | 0      |
| Sarda                  | 0       | 0          | 1         | 0     | 0     | 0         | 0            | 0           | 0               | 0              | 0         | 1        | 0           | 0      | 1           | 1           | 1        | 0             | 1             | 14             | 1     | 0            | 0         | 0      | 1       | 0      | 0            | 0     | 0       | 1        | 0          |        |
| Sopravissana           | 0       | 0          | 0         | 0     | 0     | 1         | 0            | 1           | 0               | 0              | 1         | 0        | 0           | 1      | 0           | 1           | 1        | 4             | 0             | 0              | 1     | 6            | 0         | 0      | 1       | 0      | 0            | 0     | 0       | 0        | 0          | 0      |
| Akkaraman              | 1       | 0          | 1         | 0     | 0     | 0         | 0            | 0           | 0               | 0              | 0         | 0        | 0           | 0      | 0           | 0           | 0        | 0             | 0             | 0              | 0     | 2            | 0         | 0      | 1       | 1      | 0            | 0     | 0       | 0        | 2          | 1      |
| Awassi                 | 0       | 0          | 0         | 0     | 0     | 0         | 0            | 0           | 0               | 0              | 0         | 0        | 0           | 0      | 0           | 0           | 0        | 0             | 0             | 0              | 0     | 0            | 0         | 0      | 0       | 0      | 0            | 0     | 0       | 0        | 1          | 0      |
| Baruwal                | 0       | 0          | 0         | 0     | 0     | 0         | 0            | 0           | 0               | 0              | 0         | 0        | 0           | 0      | 0           | 0           | 0        | 0             | 0             | 0              | 0     | 1            | 0         | 0      | 48      | 0      | 0            | 0     | 1       | 0        | 1          | 0      |
| Daglic                 | 0       | 0          | 0         | 0     | 0     | 0         | 0            | 0           | 0               | 0              | 0         | 0        | 2           | 0      | 0           | 0           | 0        | 0             | 0             | 0              | 1     | 0            | 1         | 0      | 0       | 2      | 4            | 1     | 0       | 6        | 6          | 4      |
| Garze Tibetan          | 0       | 0          | 0         | 0     | 0     | 0         | 0            | 0           | 1               | 1              | 0         | 0        | 0           | 0      | 1           | 0           | 0        | 0             | 0             | 0              | 0     | 1            | 0         | 0      | 0       | 4      | 14           | 4     | 0       | 0        | 13         | 4      |
| Herik                  | 1       | 1          | 0         | 0     | 0     | 0         | 0            | 0           | 0               | 0              | 0         | 0        | 0           | 1      | 1           | 0           | 0        | 0             | 0             | 0              | 0     | 0            | 0         | 0      | 1       | 4      | 2            | 0     | 1       | 3        | 1          |        |
| Karakas                | 0       | 0          | 0         | 0     | 0     | 0         | 0            | 0           | 0               | 0              | 0         | 0        | 0           | 0      | 0           | 0           | 0        | 0             | 0             | 0              | 0     | 0            | 0         | 1      | 0       | 0      | 0            | 8     | 0       | 0        | 0          |        |
| Karayaka               | 0       | 0          | 0         | 0     | 1     | 0         | 0            | 0           | 0               | 0              | 2         | 0        | 0           | 0      | 0           | 0           | 0        | 0             | 0             | 0              | 0     | 0            | 0         | 0      | 6       | 0      | 1            | 0     | 6       | 2        | 1          |        |
| Morkaraman             | 0       | 0          | 0         | 0     | 0     | 0         | 0            | 0           | 0               | 0              | 0         | 0        | 1           | 0      | 0           | 0           | 0        | 0             | 1             | 0              | 1     | 0            | 2         | 1      | 6       | 13     | 3            | 0     | 2       | 8        | 4          |        |
| Norduz                 | 0       | 0          | 0         | 0     | 0     | 0         | 1            | 0           | 0               | 1              | 0         | 1        | 0           | 0      | 0           | 0           | 0        | 0             | 0             | 0              | 0     | 0            | 1         | 0      | 0       | 4      | 4            | 1     | 0       | 1        | 4          | 0      |

Matrix of proportions of Similarities between breeds

|                        | Boujaad | ch de Mont | Beni-Guil | D'man | Sardi | Timahdite | hurra Algarv | hurra Badar | Latxa Blonde Fa | Latxa Black Fa | Campaniça | de Terra | German Meri | Saloia | banish Meri | Appenninica | Comisana | Intile de Pug | Lacaune of It | Merinzata Ital | Sarda | Sopravissana | Akkaraman | Awassi | Baruwal | Daglic | Garze Tibeta | Herik | Karakas | Karayaka | Morkaraman | Norduz |
|------------------------|---------|------------|-----------|-------|-------|-----------|--------------|-------------|-----------------|----------------|-----------|----------|-------------|--------|-------------|-------------|----------|---------------|---------------|----------------|-------|--------------|-----------|--------|---------|--------|--------------|-------|---------|----------|------------|--------|
| Boujaad                | 0.54    | 0.00       | 0.05      | 0.00  | 0.04  | 0.05      | 0.05         | 0.00        | 0.00            | 0.00           | 0.00      | 0.00     | 0.00        | 0.00   | 0.00        | 0.00        | 0.00     | 0.00          | 0.04          | 0.04           | 0.00  | 0.00         | 0.11      | 0.00   | 0.00    | 0.00   | 0.00         | 0.06  | 0.00    | 0.00     | 0.00       | 0.00   |
| Blanch de Montagne     | 0.00    | 0.18       | 0.00      | 0.16  | 0.11  | 0.10      | 0.00         | 0.07        | 0.00            | 0.10           | 0.00      | 0.06     | 0.00        | 0.04   | 0.00        | 0.00        | 0.00     | 0.08          | 0.00          | 0.04           | 0.00  | 0.00         | 0.00      | 0.00   | 0.00    | 0.00   | 0.00         | 0.06  | 0.00    | 0.00     | 0.00       | 0.00   |
| Beni-Guil              | 0.04    | 0.00       | 0.21      | 0.03  | 0.07  | 0.03      | 0.00         | 0.00        | 0.05            | 0.00           | 0.00      | 0.00     | 0.10        | 0.00   | 0.00        | 0.00        | 0.00     | 0.00          | 0.04          | 0.00           | 0.04  | 0.00         | 0.11      | 0.00   | 0.00    | 0.00   | 0.00         | 0.00  | 0.00    | 0.00     | 0.00       | 0.00   |
| D'man                  | 0.00    | 0.36       | 0.16      | 0.47  | 0.28  | 0.33      | 0.00         | 0.00        | 0.00            | 0.00           | 0.00      | 0.00     | 0.00        | 0.00   | 0.00        | 0.00        | 0.00     | 0.00          | 0.00          | 0.00           | 0.00  | 0.00         | 0.00      | 0.00   | 0.00    | 0.00   | 0.00         | 0.00  | 0.00    | 0.00     | 0.00       | 0.00   |
| Sardi                  | 0.08    | 0.11       | 0.16      | 0.13  | 0.22  | 0.05      | 0.03         | 0.00        | 0.00            | 0.00           | 0.00      | 0.11     | 0.05        | 0.00   | 0.13        | 0.04        | 0.02     | 0.00          | 0.00          | 0.08           | 0.00  | 0.00         | 0.00      | 0.00   | 0.00    | 0.00   | 0.00         | 0.00  | 0.00    | 0.05     | 0.00       | 0.00   |
| Timahdite              | 0.12    | 0.14       | 0.11      | 0.20  | 0.07  | 0.23      | 0.03         | 0.00        | 0.10            | 0.05           | 0.00      | 0.00     | 0.04        | 0.00   | 0.00        | 0.03        | 0.04     | 0.08          | 0.04          | 0.00           | 0.06  | 0.00         | 0.00      | 0.00   | 0.00    | 0.00   | 0.00         | 0.00  | 0.00    | 0.00     | 0.00       | 0.00   |
| Churra Algarvia        | 0.08    | 0.00       | 0.00      | 0.00  | 0.02  | 0.02      | 0.80         | 0.07        | 0.00            | 0.00           | 0.00      | 0.06     | 0.00        | 0.04   | 0.00        | 0.00        | 0.00     | 0.00          | 0.00          | 0.00           | 0.00  | 0.00         | 0.00      | 0.00   | 0.00    | 0.00   | 0.00         | 0.00  | 0.00    | 0.00     | 0.00       | 0.06   |
| Churra Badana          | 0.00    | 0.02       | 0.00      | 0.00  | 0.00  | 0.00      | 0.03         | 0.43        | 0.05            | 0.00           | 0.00      | 0.11     | 0.00        | 0.09   | 0.00        | 0.00        | 0.00     | 0.00          | 0.00          | 0.00           | 0.00  | 0.06         | 0.00      | 0.00   | 0.00    | 0.00   | 0.00         | 0.00  | 0.00    | 0.00     | 0.00       | 0.00   |
| Latxa Blonde Face      | 0.00    | 0.00       | 0.05      | 0.00  | 0.00  | 0.03      | 0.00         | 0.07        | 0.29            | 0.15           | 0.00      | 0.00     | 0.00        | 0.13   | 0.00        | 0.08        | 0.00     | 0.00          | 0.08          | 0.00           | 0.00  | 0.00         | 0.00      | 0.00   | 0.00    | 0.02   | 0.00         | 0.00  | 0.00    | 0.00     | 0.00       |        |
| Latxa Black Face       | 0.00    | 0.05       | 0.00      | 0.00  | 0.00  | 0.02      | 0.00         | 0.00        | 0.14            | 0.40           | 0.07      | 0.00     | 0.00        | 0.13   | 0.04        | 0.00        | 0.04     | 0.00          | 0.00          | 0.00           | 0.00  | 0.00         | 0.00      | 0.00   | 0.00    | 0.02   | 0.00         | 0.00  | 0.00    | 0.00     | 0.00       | 0.06   |
| Campaniça              | 0.00    | 0.00       | 0.00      | 0.00  | 0.00  | 0.00      | 0.00         | 0.00        | 0.05            | 0.29           | 0.06      | 0.05     | 0.04        | 0.00   | 0.00        | 0.02        | 0.04     | 0.04          | 0.00          | 0.00           | 0.06  | 0.00         | 0.00      | 0.00   | 0.00    | 0.00   | 0.00         | 0.00  | 0.11    | 0.00     | 0.00       |        |
| Churra de Terra Quente | 0.00    | 0.02       | 0.00      | 0.00  | 0.04  | 0.00      | 0.03         | 0.14        | 0.00            | 0.00           | 0.07      | 0.33     | 0.00        | 0.09   | 0.13        | 0.00        | 0.00     | 0.00          | 0.00          | 0.04           | 0.00  | 0.00         | 0.00      | 0.00   | 0.00    | 0.00   | 0.00         | 0.00  | 0.00    | 0.00     | 0.00       | 0.06   |
| German Merino          | 0.00    | 0.00       | 0.11      | 0.00  | 0.02  | 0.00      | 0.00         | 0.00        | 0.00            | 0.07           | 0.00      | 0.30     | 0.00        | 0.13   | 0.04        | 0.00        | 0.04     | 0.08          | 0.04          | 0.04           | 0.04  | 0.00         | 0.00      | 0.00   | 0.00    | 0.07   | 0.00         | 0.00  | 0.00    | 0.02     | 0.00       |        |
| Saloia                 | 0.00    | 0.02       | 0.00      | 0.00  | 0.00  | 0.02      | 0.03         | 0.14        | 0.14            | 0.00           | 0.07      | 0.11     | 0.00        | 0.17   | 0.00        | 0.00        | 0.02     | 0.04          | 0.08          | 0.08           | 0.00  | 0.06         | 0.00      | 0.00   | 0.00    | 0.00   | 0.06         | 0.00  | 0.00    | 0.00     | 0.00       | 0.00   |
| Spanish Merino         | 0.00    | 0.00       | 0.00      | 0.00  | 0.02  | 0.00      | 0.00         | 0.00        | 0.05            | 0.00           | 0.06      | 0.05     | 0.00        | 0.00   | 0.00        | 0.00        | 0.00     | 0.08          | 0.04          | 0.00           | 0.00  | 0.00         | 0.00      | 0.00   | 0.00    | 0.00   | 0.06         | 0.00  | 0.00    | 0.00     | 0.00       |        |
| Appenninica            | 0.00    | 0.00       | 0.00      | 0.00  | 0.02  | 0.00      | 0.00         | 0.00        | 0.10            | 0.05           | 0.00      | 0.00     | 0.05        | 0.00   | 0.00        | 0.50        | 0.00     | 0.00          | 0.08          | 0.08           | 0.04  | 0.06         | 0.00      | 0.00   | 0.00    | 0.02   | 0.00         | 0.00  | 0.00    | 0.00     | 0.00       |        |
| Comisana               | 0.00    | 0.00       | 0.00      | 0.00  | 0.02  | 0.03      | 0.00         | 0.00        | 0.00            | 0.00           | 0.07      | 0.00     | 0.00        | 0.04   | 0.00        | 0.00        | 0.84     | 0.04          | 0.08          | 0.00           | 0.04  | 0.06         | 0.00</    |        |         |        |              |       |         |          |            |        |

#### 4. Genetic distances

NB: Values of the corrected average pair-wise differences between populations (Da) are below the diagonal, and the values of the average number of pair-wise differences between populations, Dxy are above.

| Da \ Dxy      | BOUJAAD | CHE DE MONT | BENI-GUIL | DMAN    | SARDI   | TIMAHDITE | URRA ALGAR | RRA BADA | BLONDE  | TA BLACK FA | CAMPANICA | A DE TERRA | ORMAN MERI | SALOIA   | NISH MER | APPENNINICA | COMISANA | NTILE DE PUG | CAUNE D'Ita | NIZZTA ITAL | SARDA   | OPRAVISSAN | AKKARAMAN | AWASSI   | BARUWAL | DAGLIC   | RZE TIBET | HERIK   | KARAKAS | KARAYAKA | WOKKARAMAN | NORDUZ  |
|---------------|---------|-------------|-----------|---------|---------|-----------|------------|----------|---------|-------------|-----------|------------|------------|----------|----------|-------------|----------|--------------|-------------|-------------|---------|------------|-----------|----------|---------|----------|-----------|---------|---------|----------|------------|---------|
| BOUJAAD       | 0       | 0.01701     | 0.01898   | 0.02048 | 0.02232 | 0.02051   | 0.00061    | 0.0008   | 0.00022 | 0.00005     | 0.0004    | 0.00042    | 0.00039    | 0.00009  | 0.00012  | 0.00037     | 0.00348  | 0.00023      | 0.0001      | 0.00031     | 0.00079 | 0.00035    | 0.01239   | 0.00975  | 0.02503 | 0.01142  | 0.0043    | 0.00489 | 0.00633 | 0.01182  | 0.01603    | 0.00916 |
| CHE DE MONT   | 0.0002  | 0           | 0.01433   | 0.01251 | 0.01659 | 0.02039   | 0.00048    | 0.00054  | 0.00056 | 0.00017     | 0.00043   | 0.00068    | 0.00078    | 0.00026  | 0.00073  | 0.0006      | 0.00339  | 0.00019      | 0.00054     | 0.0003      | 0.0008  | 0.00053    | 0.0121    | 0.01154  | 0.02241 | 0.01079  | 0.0037    | 0.00434 | 0.00635 | 0.01105  | 0.01531    | 0.00884 |
| BENI-GUIL     | 0.00017 | 0.00036     | 0         | 0.0148  | 0.01774 | 0.0193    | 0.00092    | 0.00038  | 0.00014 | 0.0002      | 0.00031   | 0.00048    | -0.00009   | 0.00008  | 0.00015  | 0.00063     | 0.00317  | 0.00021      | 0.00014     | 0.00033     | 0.00083 | 0.00042    | 0.00969   | 0.01649  | 0.02082 | 0.00981  | 0.00333   | 0.0042  | 0.00548 | 0.00947  | 0.01226    | 0.00706 |
| DMAN          | 0.00104 | 0.00059     | 0.00007   | 0       | 0.01879 | 0.01702   | 0.00213    | 0.00146  | 0.00111 | 0.00104     | 0.00109   | 0.00152    | 0.00044    | 0.00083  | 0.00078  | 0.00133     | 0.00469  | 0.00092      | 0.00073     | 0.00125     | 0.00183 | 0.00094    | 0.01458   | 0.01303  | 0.02582 | 0.01384  | 0.0058    | 0.00612 | 0.0082  | 0.01403  | 0.01874    | 0.01111 |
| SARDI         | 0.0004  | 0.00065     | 0.00017   | 0.00106 | 0       | 0.02143   | 0.00055    | 0.00009  | 0.0004  | 0.00009     | 0.00016   | -0.00008   | 0.00002    | 0.00013  | 0.00026  | 0.0005      | 0.00203  | 0.00015      | 0.00014     | -0.00013    | 0.00045 | 0.00002    | 0.01203   | 0.00926  | 0.02229 | 0.01147  | 0.00349   | 0.00384 | 0.00607 | 0.01104  | 0.01665    | 0.00915 |
| TIMAHDITE     | 0.00004 | 0.00052     | 0.00016   | 0.0004  | 0.00042 | 0         | 0.00062    | 0.00017  | 0.00021 | 0.00029     | 0.00047   | 0.00041    | 0.00039    | 0.00011  | 0.00042  | 0.00011     | 0.00366  | 0.00031      | 0.00021     | 0.00016     | 0.00097 | 0.00031    | 0.01045   | 0.01536  | 0.02392 | 0.00914  | 0.00324   | 0.00456 | 0.00562 | 0.00966  | 0.01189    | 0.00671 |
| URRA ALGAR    | 0.02283 | 0.01671     | 0.01926   | 0.02074 | 0.02206 | 0.02266   | 0          | 0.018    | 0.01587 | 0.01829     | 0.01757   | 0.01989    | 0.01962    | 0.01887  | 0.01864  | 0.0188      | 0.0298   | 0.01839      | 0.01761     | 0.01967     | 0.01776 | 0.0188     | 0.01011   | 0.00667  | 0.02422 | 0.00975  | 0.00268   | 0.00375 | 0.0046  | 0.0113   | 0.01482    | 0.00655 |
| HURRA BADAN   | 0.01983 | 0.01312     | 0.01495   | 0.01674 | 0.01776 | 0.01783   | 0.00058    | 0        | 0.01224 | 0.01475     | 0.01428   | 0.01614    | 0.01577    | 0.01533  | 0.01495  | 0.01516     | 0.02674  | 0.01497      | 0.01393     | 0.01614     | 0.01389 | 0.01518    | 0.01286   | 0.00927  | 0.02537 | 0.01267  | 0.00393   | 0.00467 | 0.00702 | 0.01232  | 0.01838    | 0.00933 |
| TA BLONDE F   | 0.01662 | 0.01066     | 0.01313   | 0.0136  | 0.01544 | 0.01528   | 0.0009     | 0.00053  | 0       | 0.01202     | 0.01144   | 0.01387    | 0.0137     | 0.01277  | 0.01171  | 0.01219     | 0.02537  | 0.01222      | 0.01098     | 0.01343     | 0.01145 | 0.01244    | 0.015     | 0.01079  | 0.0287  | 0.01506  | 0.00516   | 0.00635 | 0.0835  | 0.016    | 0.02074    | 0.01077 |
| TA BLACK FA   | 0.01938 | 0.01221     | 0.01551   | 0.01635 | 0.01789 | 0.0176    | 0.00062    | 0.00034  | 0.00008 | 0           | 0.01397   | 0.01633    | 0.01614    | 0.01473  | 0.01455  | 0.01496     | 0.04645  | 0.01483      | 0.01371     | 0.0161      | 0.01422 | 0.015      | 0.01328   | 0.00896  | 0.02571 | 0.01271  | 0.00417   | 0.00467 | 0.00712 | 0.01289  | 0.0183     | 0.0098  |
| CAMPANICA     | 0.01915 | 0.01259     | 0.01566   | 0.01605 | 0.01783 | 0.01866   | 0.00051    | 0.0005   | 0.00016 | -0.00003    | 0         | 0.01577    | 0.01565    | 0.01429  | 0.01381  | 0.01431     | 0.02649  | 0.01416      | 0.01297     | 0.01554     | 0.0136  | 0.01431    | 0.01429   | 0.01026  | 0.02804 | 0.01416  | 0.00479   | 0.00556 | 0.0078  | 0.01477  | 0.02008    | 0.01016 |
| A DE TERRA C  | 0.02123 | 0.01562     | 0.01755   | 0.01829 | 0.0194  | 0.02101   | 0.00063    | 0.00013  | 0.00033 | 0.00009     | 0.00016   | 0          | 0.01729    | 0.0167   | 0.01639  | 0.01674     | 0.0282   | 0.01661      | 0.01553     | 0.01776     | 0.01565 | 0.01663    | 0.01289   | 0.00873  | 0.02544 | 0.01259  | 0.00397   | 0.00471 | 0.00698 | 0.01284  | 0.01849    | 0.00933 |
| ORMAN MERI    | 0.01999 | 0.01476     | 0.01517   | 0.01591 | 0.01911 | 0.01872   | 0.00063    | 0.00055  | 0.00038 | 0.00019     | 0         | 0.01668    | 0.01633    | 0.01634  | 0.02859  | 0.01623     | 0.0152   | 0.01773      | 0.0164      | 0.016       | 0.01226 | 0.00771    | 0.02458   | 0.0114   | 0.00332 | 0.00368  | 0.00635   | 0.01131 | 0.01682 | 0.0091   |            |         |
| SALOIA        | 0.01932 | 0.01525     | 0.01469   | 0.01567 | 0.01847 | 0.02069   | 0.00045    | 0.00023  | 0.00029 | -0.00012    | 0.00032   | 0.00002    | -0.00001   | 0        | 0.0154   | 0.01509     | 0.02746  | 0.01532      | 0.01431     | 0.01693     | 0.01519 | 0.01507    | 0.0129    | 0.00707  | 0.02382 | 0.01115  | 0.00326   | 0.00366 | 0.0062  | 0.01078  | 0.01654    | 0.00934 |
| PANISH MERI   | 0.01876 | 0.01329     | 0.0148    | 0.01533 | 0.01752 | 0.01754   | 0.00106    | 0.00071  | 0.00006 | 0.00007     | 0.00012   | 0.00028    | 0.00024    | 0.00024  | 0        | 0.01437     | 0.02732  | 0.01444      | 0.01305     | 0.01566     | 0.01397 | 0.0145     | 0.01494   | 0.01105  | 0.02895 | 0.01461  | 0.00512   | 0.00596 | 0.00797 | 0.01531  | 0.02025    | 0.0109  |
| APPENNINICA   | 0.0193  | 0.01336     | 0.01571   | 0.0164  | 0.01818 | 0.01781   | 0.001      | 0.00071  | 0.00032 | 0.00027     | 0.00028   | 0.00042    | 0.0008     | 0.00028  | 0.00022  | 0           | 0.02762  | 0.01498      | 0.01357     | 0.01597     | 0.01415 | 0.01491    | 0.01492   | 0.01122  | 0.02921 | 0.01449  | 0.00555   | 0.0062  | 0.0084  | 0.01512  | 0.02022    | 0.011   |
| COMISANA      | 0.03072 | 0.02518     | 0.02533   | 0.02772 | 0.02804 | 0.03031   | 0.0028     | 0.00308  | 0.00429 | 0.00713     | 0.00351   | 0.00267    | 0.00233    | 0.00203  | 0.00394  | 0.00405     | 0        | 0.0271       | 0.02629     | 0.02776     | 0.02619 | 0.02717    | 0.00713   | 0.00121  | 0.0161  | 0.00566  | 0.00157   | 0.00014 | 0.00377 | 0.00334  | 0.00968    | 0.00743 |
| s             | 0.01957 | 0.01325     | 0.01606   | 0.01633 | 0.01811 | 0.01905   | 0.00044    | 0.00037  | 0.0002  | -0.00002    | -0.00003  | 0.00014    | 0.00023    | 0.00018  | 0.00014  | 0.00047     | 0.00337  | 0            | 0.01353     | 0.01603     | 0.01401 | 0.01473    | 0.01379   | 0.00963  | 0.02769 | 0.0134   | 0.00452   | 0.00529 | 0.00711 | 0.01388  | 0.0192     | 0.00989 |
| CAUNE D'Ital  | 0.01804 | 0.01255     | 0.01421   | 0.01486 | 0.01685 | 0.01699   | 0.00076    | 0.00042  | 0.00006 | -0.00004    | -0.00006  | 0.00016    | 0.0001     | 0.00016  | -0.00015 | 0.00016     | 0.00366  | -0.00004     | 0           | 0.0148      | 0.01304 | 0.01364    | 0.01457   | 0.0106   | 0.02606 | 0.01425  | 0.0049    | 0.00567 | 0.00776 | 0.01472  | 0.01984    | 0.01054 |
| NIZZTA ITALI  | 0.0205  | 0.01477     | 0.01656   | 0.01762 | 0.01864 | 0.01975   | 0.00045    | 0.00025  | 0.00013 | -0.00002    | 0.00006   | 0.00001    | 0.00001    | -0.00002 | 0.00008  | 0.00017     | 0.00276  | 0.00008      | -0.00005    | 0           | 0.01533 | 0.016      | 0.01322   | 0.00878  | 0.02606 | 0.01283  | 0.00408   | 0.00466 | 0.00678 | 0.01309  | 0.0183     | 0.00968 |
| SARDA         | 0.01893 | 0.01426     | 0.01584   | 0.01635 | 0.01768 | 0.01996   | 0.00085    | 0.00031  | 0.00047 | 0.00042     | 0.00045   | 0.0002     | 0.00088    | 0.00043  | 0.0007   | 0.00067     | 0.0035   | 0.00037      | 0.0005      | 0.00041     | 0       | 0.01424    | 0.01471   | 0.01038  | 0.0281  | 0.01416  | 0.00497   | 0.00573 | 0.00783 | 0.01453  | 0.02006    | 0.01053 |
| OPRAVISSANA   | 0.02044 | 0.01349     | 0.01615   | 0.01663 | 0.01827 | 0.0189    | 0.00075    | 0.00047  | 0.00032 | 0.00005     | 0.00002   | 0.00004    | 0.00016    | 0.00023  | 0.00009  | 0.00029     | 0.00334  | -0.00004     | -0.00003    | -0.00006    | 0.0005  | 0          | 0.01416   | 0.01024  | 0.02795 | 0.01367  | 0.00478   | 0.00531 | 0.00768 | 0.01406  | 0.01973    | 0.01022 |
| AKKARAMAN     | 0.04654 | 0.03946     | 0.0363    | 0.0444  | 0.04479 | 0.04002   | 0.043      | 0.0425   | 0.04215 | 0.04314     | 0.04363   | 0.04434    | 0.04419    | 0.04448  | 0.04485  | 0.04501     | 0.04645  | 0.04404      | 0.04372     | 0.04475     | 0.04393 | 0.04451    | 0         | 0.04185  | 0.04571 | 0.0488   | 0.04153   | 0.04191 | 0.04357 | 0.05483  | 0.04833    | 0.04208 |
| AWASSI        | 0.04217 | 0.03869     | 0.03738   | 0.04304 | 0.04184 | 0.04405   | 0.03892    | 0.0383   | 0.03731 | 0.03817     | 0.03896   | 0.03954    | 0.03924    | 0.03885  | 0.04049  | 0.04085     | 0.04005  | 0.03941      | 0.03928     | 0.03984     | 0.03913 | 0.04012    | -0.0026   | 0        | 0.0473  | 0.0456   | 0.0378    | 0.03694 | 0.04068 | 0.04872  | 0.04595    | 0.04252 |
| BARUWAL       | 0.04902 | 0.04088     | 0.03994   | 0.04586 | 0.04527 | 0.04701   | 0.0473     | 0.0452   | 0.04606 | 0.04577     | 0.0475    | 0.04709    | 0.04632    | 0.04566  | 0.04893  | 0.04938     | 0.042    | 0.04801      | 0.04758     | 0.04767     | 0.04739 | 0.04839    | 0.01043   | 0.02422  | 0       | 0.0493   | 0.04185   | 0.03871 | 0.04627 | 0.04566  | 0.04817    | 0.05034 |
| DAGLIC        | 0.0457  | 0.04089     | 0.03667   | 0.04453 | 0.04637 | 0.03882   | 0.04585    | 0.0451   | 0.0443  | 0.04475     | 0.04552   | 0.04638    | 0.04552    | 0.04583  | 0.0464   | 0.04601     | 0.0479   | 0.04543      | 0.04517     | 0.04668     | 0.04577 | 0.04537    | -0.00095  | -0.00394 | 0.01002 | 0        | 0.04637   | 0.04531 | 0.04865 | 0.05317  | 0.04944    | 0.04802 |
| BARZE TIBETAN | 0.03358 | 0.02681     | 0.02566   | 0.03092 | 0.0317  | 0.03045   | 0.03076    | 0.0288   | 0.02752 | 0.02923     | 0.0293    | 0.03062    | 0.03078    | 0.03084  | 0.03029  | 0.03092     | 0.03615  | 0.03004      | 0.02932     | 0.03088     | 0.02946 | 0.03041    | 0.00124   | -0.00183 | 0.01177 | 0.00036  | 0         | 0.03476 | 0.03791 | 0.04808  | 0.03797    |         |
| HERIK         | 0.0347  | 0.02735     | 0.02752   | 0.03185 | 0.03256 | 0.03186   | 0.03226    | 0.03     | 0.02922 | 0.03025     | 0.03048   | 0.03189    | 0.03171    | 0.03087  | 0.03167  | 0.0321      | 0.03528  | 0.03134      | 0.03062     | 0.032       | 0.03074 | 0.03147    | 0.00149   | -0.00271 | 0.00776 | 0.00047  | -0.00095  | 0       | 0.03911 | 0.04751  | 0.0473     | 0.04024 |
| KARAKAS       | 0.0379  | 0.03324     | 0.03013   | 0.03569 | 0.03673 | 0.03605   | 0.03595    | 0.035    | 0.03373 | 0.03537     | 0.0355    | 0.03682    | 0.03684    | 0.03723  | 0.03569  | 0.03631     | 0.04039  | 0.03518      | 0.03471     | 0.0361      | 0.03485 | 0.03586    | 0.00023   | -0.00219 | 0.01275 | -0.00035 | -0.00087  | 0.0002  | 0       | 0.05448  | 0.04935    | 0.03979 |
| KARAYAKA      | 0.04867 | 0.04498     | 0.03879   | 0.0476  | 0.04939 | 0.04238   | 0.04975    | 0.0472   | 0.0466  | 0.04662     | 0.04799   | 0.04947    | 0.04733    | 0.04753  | 0.04902  | 0.04895     | 0.04868  | 0.04811      | 0.04772     | 0.04875     | 0.04841 | 0.04831    | 0.00201   | -0.00515 | 0.00472 | 0.00064  | 0.00156   | -0.0005 | 0.00253 | 0        | 0.05436    | 0.0558  |
| WOKKARAMAN    | 0.04959 | 0.04462     | 0.03838   | 0.04893 | 0.05086 | 0.04108   | 0.05083    | 0.0501   | 0.0498  | 0.05015     | 0.05135   | 0.05208    | 0.05117    | 0.05072  | 0.05178  | 0.05155     | 0.05176  | 0.05111      | 0.0504      | 0.05196     | 0.0512  | 0.05141    | -0.00113  | -0.00271 | 0.00965 | -0.00049 | 0.0028    |         |         |          |            |         |



| Breeds                     | Individuals              | Network correspondance     | Breeds                   | Individuals                  | Network correspondance |
|----------------------------|--------------------------|----------------------------|--------------------------|------------------------------|------------------------|
| Garze Tibetan              | GARZE TIBETAN KU681175.1 | GARZ01                     | Gentile de Puglia        | GENTILE DE PUGLIA KF228668.1 | GENT01                 |
|                            | GARZE TIBETAN KU681176.1 | GARZ02                     |                          | GENTILE DE PUGLIA KF228669.1 | GENT02                 |
|                            | GARZE TIBETAN KU681177.1 | GARZ03                     |                          | GENTILE DE PUGLIA KF228670.1 | GENT03                 |
|                            | GARZE TIBETAN KU681179.1 | GARZ04                     |                          | GENTILE DE PUGLIA KF228671.1 | GENT04                 |
|                            | GARZE TIBETAN KU681180.1 | GARZ05                     |                          | GENTILE DE PUGLIA KF228672.1 | GENT05                 |
|                            | GARZE TIBETAN KU681181.1 | GARZ06                     |                          | GENTILE DE PUGLIA KF228673.1 | GENT06                 |
|                            | GARZE TIBETAN KU681182.1 | GARZ07                     |                          | GENTILE DE PUGLIA KF228674.1 | GENT07                 |
|                            | GARZE TIBETAN KU681183.1 | GARZ08                     |                          | GENTILE DE PUGLIA KF228675.1 | GENT08                 |
|                            | GARZE TIBETAN KU681184.1 | GARZ09                     |                          | GENTILE DE PUGLIA KF228676.1 | GENT09                 |
|                            | GARZE TIBETAN KU681185.1 | GARZ10                     |                          | GENTILE DE PUGLIA KF228677.1 | GENT10                 |
|                            | GARZE TIBETAN KU681186.1 | GARZ11                     |                          | GENTILE DE PUGLIA KF228678.1 | GENT11                 |
|                            | GARZE TIBETAN KU681187.1 | GARZ12                     |                          | GENTILE DE PUGLIA KF228679.1 | GENT12                 |
|                            | GARZE TIBETAN KU681188.1 | GARZ13                     |                          | GENTILE DE PUGLIA KF228680.1 | GENT13                 |
|                            | GARZE TIBETAN KU681189.1 | GARZ14                     |                          | GENTILE DE PUGLIA KF228681.1 | GENT14                 |
|                            | GARZE TIBETAN KU681190.1 | GARZ15                     |                          | GENTILE DE PUGLIA KF228682.1 | GENT15                 |
|                            | GARZE TIBETAN KU681191.1 | GARZ16                     |                          | GENTILE DE PUGLIA KF228683.1 | GENT16                 |
|                            | GARZE TIBETAN KU681192.1 | GARZ17                     |                          | GENTILE DE PUGLIA KF228684.1 | GENT17                 |
| Akkaraman                  | AKKARAMAN AY091497.1     | AKKA01                     |                          | GENTILE DE PUGLIA KF228685.1 | GENT18                 |
|                            | AKKARAMAN JN574132.1     | AKKA02                     |                          | GENTILE DE PUGLIA KF228686.1 | GENT19                 |
|                            | AKKARAMAN JN574133.1     | AKKA03                     |                          | GENTILE DE PUGLIA KF228687.1 | GENT20                 |
|                            | AKKARAMAN JN574134.1     | AKKA04                     |                          | GENTILE DE PUGLIA KF228688.1 | GENT21                 |
|                            | AKKARAMAN JN574135.1     | AKKA05                     |                          | GENTILE DE PUGLIA KF228689.1 | GENT22                 |
|                            | AKKARAMAN JN574136.1     | AKKA06                     |                          | GENTILE DE PUGLIA KF228690.1 | GENT23                 |
|                            | AKKARAMAN JN574137.1     | AKKA07                     |                          | GENTILE DE PUGLIA KF228691.1 | GENT24                 |
|                            | AKKARAMAN JN574138.1     | AKKA08                     |                          | GENTILE DE PUGLIA KF228692.1 | GENT25                 |
|                            | AKKARAMAN JN574139.1     | AKKA09                     |                          | GENTILE DE PUGLIA KF228693.1 | GENT26                 |
|                            | AKKARAMAN JN574140.1     | AKKA10                     |                          | GENTILE DE PUGLIA KF228694.1 | GENT27                 |
|                            | AKKARAMAN JN574141.1     | AKKA11                     |                          | GENTILE DE PUGLIA KF302448.1 | GENT28                 |
|                            | AKKARAMAN JN574142.1     | AKKA12                     |                          | GENTILE DE PUGLIA KF302455.1 | GENT29                 |
|                            | AKKARAMAN JN574143.1     | AKKA13                     |                          | GENTILE DE PUGLIA KF302457.1 | GENT30                 |
|                            | AKKARAMAN JN574144.1     | AKKA14                     | GERMAN MERINO JN573922.1 | GERM01                       |                        |
|                            | AKKARAMAN JN574147.1     | AKKA17                     | GERMAN MERINO JN573923.1 | GERM02                       |                        |
|                            | AKKARAMAN KF677049.1     | AKKA18                     | GERMAN MERINO JN573924.1 | GERM03                       |                        |
|                            | Churra Algarvia          | CHURRA ALGARVIA DQ491580.1 | ALGA01                   | GERMAN MERINO JN573925.1     | GERM04                 |
|                            |                          | CHURRA ALGARVIA DQ491589.1 | ALGA02                   | GERMAN MERINO JN573926.1     | GERM05                 |
| CHURRA ALGARVIA DQ491591.1 |                          | ALGA03                     | GERMAN MERINO JN573927.1 | GERM06                       |                        |
| CHURRA ALGARVIA DQ491646.1 |                          | ALGA04                     | GERMAN MERINO JN573928.1 | GERM07                       |                        |
| CHURRA ALGARVIA DQ491649.1 |                          | ALGA05                     | GERMAN MERINO JN573929.1 | GERM08                       |                        |
| CHURRA ALGARVIA DQ491652.1 |                          | ALGA06                     | GERMAN MERINO JN573930.1 | GERM09                       |                        |
| CHURRA ALGARVIA DQ491654.1 |                          | ALGA07                     | GERMAN MERINO JN573931.1 | GERM10                       |                        |
| CHURRA ALGARVIA DQ491656.1 |                          | ALGA08                     | GERMAN MERINO JN573932.1 | GERM11                       |                        |
| CHURRA ALGARVIA DQ491658.1 |                          | ALGA09                     | GERMAN MERINO JN573933.1 | GERM12                       |                        |
| CHURRA ALGARVIA DQ491664.1 |                          | ALGA10                     | GERMAN MERINO JN573934.1 | GERM13                       |                        |
| CHURRA ALGARVIA DQ491678.1 |                          | ALGA11                     | GERMAN MERINO JN573935.1 | GERM14                       |                        |
| CHURRA ALGARVIA DQ491687.1 |                          | ALGA12                     | GERMAN MERINO JN573936.1 | GERM15                       |                        |
| CHURRA ALGARVIA DQ491699.1 |                          | ALGA13                     | GERMAN MERINO JN573937.1 | GERM16                       |                        |
| CHURRA ALGARVIA DQ491706.1 |                          | ALGA14                     | GERMAN MERINO JN573938.1 | GERM17                       |                        |
| CHURRA ALGARVIA DQ491708.1 |                          | ALGA15                     | GERMAN MERINO JN573939.1 | GERM18                       |                        |
| CHURRA ALGARVIA DQ491712.1 |                          | ALGA16                     | GERMAN MERINO JN573940.1 | GERM19                       |                        |
| CHURRA ALGARVIA DQ491713.1 |                          | ALGA17                     | GERMAN MERINO JN573941.1 | GERM20                       |                        |
| CHURRA ALGARVIA DQ491714.1 |                          | ALGA18                     | GERMAN MERINO JN573942.1 | GERM21                       |                        |
| CHURRA ALGARVIA DQ491719.1 |                          | ALGA19                     | GERMAN MERINO JN573943.1 | GERM22                       |                        |
| CHURRA ALGARVIA DQ491720.1 |                          | ALGA20                     | GERMAN MERINO JN573944.1 | GERM23                       |                        |
| CHURRA ALGARVIA DQ491722.1 |                          | ALGA21                     | GERMAN MERINO JN573945.1 | GERM24                       |                        |
| CHURRA ALGARVIA DQ491723.1 |                          | ALGA22                     | GERMAN MERINO JN573946.1 | GERM25                       |                        |
| CHURRA ALGARVIA DQ491724.1 |                          | ALGA23                     | GERMAN MERINO JN573947.1 | GERM26                       |                        |
| CHURRA ALGARVIA DQ491725.1 |                          | ALGA24                     | GERMAN MERINO JN573948.1 | GERM27                       |                        |
| CHURRA ALGARVIA DQ491728.1 |                          | ALGA25                     | GERMAN MERINO JN574174.1 | GERM28                       |                        |
| CHURRA ALGARVIA DQ491730.1 |                          | ALGA26                     | GERMAN MERINO JN574209.1 | GERM29                       |                        |
| CHURRA ALGARVIA DQ491732.1 |                          | ALGA27                     | HERIK KF677119.1         | HERIO1                       |                        |
| CHURRA ALGARVIA DQ491733.1 |                          | ALGA28                     | HERIK KF677120.1         | HERIO2                       |                        |
| CHURRA ALGARVIA DQ491735.1 |                          | ALGA29                     | HERIK KF677121.1         | HERIO3                       |                        |
| CHURRA ALGARVIA DQ491736.1 |                          | ALGA30                     | HERIK KF677122.1         | HERIO4                       |                        |
| Appenninica                | APPENNINICA KF228617.1   | APPE01                     | HERIK KF677123.1         | HERIO5                       |                        |
|                            | APPENNINICA KF228618.1   | APPE02                     | HERIK KF677124.1         | HERIO6                       |                        |
|                            | APPENNINICA KF228612.1   | APPE03                     | HERIK KF677125.1         | HERIO7                       |                        |
|                            | APPENNINICA KF228613.1   | APPE04                     | HERIK KF677126.1         | HERIO8                       |                        |
|                            | APPENNINICA KF228614.1   | APPE05                     | HERIK KF677127.1         | HERIO9                       |                        |
|                            | APPENNINICA KF228615.1   | APPE06                     | HERIK KF677128.1         | HERIO10                      |                        |
|                            | APPENNINICA KF228616.1   | APPE07                     | HERIK KF677129.1         | HERIO11                      |                        |
|                            | APPENNINICA KF228619.1   | APPE08                     | HERIK KF677130.1         | HERIO12                      |                        |
|                            | APPENNINICA KF228620.1   | APPE09                     | HERIK KF677131.1         | HERIO13                      |                        |
|                            | APPENNINICA KF228621.1   | APPE10                     | HERIK KF677132.1         | HERIO14                      |                        |
|                            | APPENNINICA KF228622.1   | APPE11                     | HERIK KF677133.1         | HERIO15                      |                        |
|                            | APPENNINICA KF228623.1   | APPE12                     | KARAKAS DQ852282.1       | KARK1                        |                        |
|                            | APPENNINICA KF228624.1   | APPE13                     | KARAKAS DQ852283.1       | KARK2                        |                        |
|                            | APPENNINICA KF228625.1   | APPE14                     | KARAKAS DQ852284.1       | KARK3                        |                        |
|                            | APPENNINICA KF228626.1   | APPE15                     | KARAKAS DQ852285.1       | KARK4                        |                        |
|                            | APPENNINICA KF228627.1   | APPE16                     | KARAKAS DQ852286.1       | KARK5                        |                        |
|                            | APPENNINICA KF228628.1   | APPE17                     | KARAKAS DQ852287.1       | KARK6                        |                        |
|                            | APPENNINICA KF228629.1   | APPE18                     | KARAKAS DQ852288.1 D     | KARK7                        |                        |
|                            | APPENNINICA KF228630.1   | APPE19                     | KARAKAS DQ852289.1       | KARK8                        |                        |
|                            | APPENNINICA KF228631.1   | APPE20                     | KARAKAS HM236176.1       | KARK9                        |                        |
|                            | APPENNINICA KF228632.1   | APPE21                     | KARAKAS HM236177.1       | KARK10                       |                        |
|                            | APPENNINICA KF228633.1   | APPE22                     | KARAKAS HM236178.1       | KARK11                       |                        |
|                            | APPENNINICA KF228634.1   | APPE23                     | KARAYAKA JN574154.1      | KARY01                       |                        |
|                            | APPENNINICA KF228636.1   | APPE24                     | KARAYAKA JN574155.1      | KARY02                       |                        |
|                            | APPENNINICA KF228637.1   | APPE25                     | KARAYAKA JN574156.1      | KARY03                       |                        |
|                            | APPENNINICA KF228638.1   | APPE26                     | KARAYAKA JN574157.1      | KARY04                       |                        |
|                            | APPENNINICA KF228639.1   | APPE27                     | KARAYAKA JN574158.1      | KARY05                       |                        |
|                            | APPENNINICA KF302450.1   | APPE28                     | KARAYAKA JN574159.1      | KARY06                       |                        |
|                            | APPENNINICA KF302451.1   | APPE29                     | KARAYAKA JN574265.1      | KARY07                       |                        |

|                   |                              |        |
|-------------------|------------------------------|--------|
| Awassi            | Awassi HM236182.1 E          | Aw_H01 |
|                   | Awassi JX235859.1            | Aw_J02 |
|                   | Awassi JX235861.1            | Aw_J03 |
| Churra Badana     | CHURRA BADANA DQ491625.1     | BADD01 |
|                   | CHURRA BADANA DQ491626.1     | BADD02 |
|                   | CHURRA BADANA DQ491629.1     | BADD03 |
|                   | CHURRA BADANA DQ491647.1     | BADD04 |
|                   | CHURRA BADANA DQ491653.1     | BADD05 |
|                   | CHURRA BADANA DQ491660.1     | BADD06 |
|                   | CHURRA BADANA DQ491661.1     | BADD07 |
|                   | CHURRA BADANA DQ491663.1     | BADD08 |
|                   | CHURRA BADANA DQ491671.1     | BADD09 |
|                   | CHURRA BADANA DQ491683.1     | BADD10 |
|                   | CHURRA BADANA DQ491684.1     | BADD11 |
|                   | CHURRA BADANA DQ491685.1     | BADD12 |
|                   | CHURRA BADANA DQ491688.1     | BADD13 |
|                   | CHURRA BADANA DQ491690.1     | BADD14 |
|                   | CHURRA BADANA DQ491692.1     | BADD15 |
|                   | CHURRA BADANA DQ491704.1     | BADD16 |
|                   | CHURRA BADANA DQ491721.1     | BADD17 |
|                   | CHURRA BADANA DQ491726.1     | BADD18 |
| Baruwal           | BARUWAL KR610850.1           | BAR_01 |
|                   | BARUWAL KR610851.1           | BAR_02 |
|                   | BARUWAL KR610852.1           | BAR_03 |
|                   | BARUWAL KR610853.1           | BAR_04 |
|                   | BARUWAL KR610854.1           | BAR_05 |
|                   | BARUWAL KR610855.1           | BAR_06 |
|                   | BARUWAL KR610856.1           | BAR_07 |
|                   | BARUWAL KR610857.1           | BAR_08 |
|                   | BARUWAL KR610858.1           | BAR_09 |
|                   | BARUWAL KR610859.1           | BAR_10 |
|                   | BARUWAL KR610860.1           | BAR_11 |
|                   | BARUWAL KR610861.1           | BAR_12 |
|                   | BARUWAL KR610862.1           | BAR_13 |
|                   | BARUWAL KR610863.1           | BAR_14 |
|                   | BARUWAL KR610864.1           | BAR_15 |
|                   | BARUWAL KR610865.1           | BAR_16 |
|                   | BARUWAL KR610866.1           | BAR_17 |
|                   | BARUWAL KR610867.1           | BAR_18 |
|                   | BARUWAL KR610868.1           | BAR_19 |
|                   | BARUWAL KR610869.1           | BAR_20 |
|                   | BARUWAL KR610870.1           | BAR_21 |
|                   | BARUWAL KR610871.1           | BAR_22 |
|                   | BARUWAL KR610872.1           | BAR_23 |
|                   | BARUWAL KR610873.1           | BAR_24 |
|                   | BARUWAL KR610874.1           | BAR_25 |
|                   | BARUWAL KR610875.1           | BAR_26 |
|                   | BARUWAL KR610876.1           | BAR_27 |
| Boujaad           | Boujaad MN229085             | BJD01  |
|                   | Boujaad MN229086             | BJD02  |
|                   | Boujaad MN229087             | BJD03  |
|                   | Boujaad MN229088             | BJD04  |
|                   | Boujaad MN229089             | BJD05  |
|                   | Boujaad MN229090             | BJD06  |
|                   | Boujaad MN229091             | BJD07  |
|                   | Boujaad MN229092             | BJD08  |
|                   | Boujaad MN229093             | BJD09  |
|                   | Boujaad MN229094             | BJD10  |
|                   | Boujaad MN229095             | BJD11  |
|                   | Boujaad MN229096             | BJD12  |
|                   | Boujaad MN229097             | BJD13  |
|                   | Boujaad MN229098             | BJD14  |
|                   | Boujaad MN229099             | BJD15  |
|                   | Boujaad MN229100             | BJD16  |
|                   | Boujaad MN229101             | BJD17  |
|                   | Boujaad MN229102             | BJD18  |
|                   | Boujaad MN229103             | BJD19  |
|                   | Boujaad MN229104             | BJD20  |
|                   | Boujaad MN229105             | BJD21  |
|                   | Boujaad MN229106             | BJD22  |
|                   | Boujaad MN229107             | BJD23  |
|                   | Boujaad MN229108             | BJD24  |
|                   | Boujaad MN229109             | BJD25  |
|                   | Boujaad MN229110             | BJD26  |
|                   | Boujaad MN229111             | BJD27  |
|                   | Boujaad MN229112             | BJD28  |
|                   | Boujaad MN229113             | BJD29  |
|                   | Boujaad MN229114             | BJD30  |
|                   | Boujaad MN229115             | BJD31  |
| LATXA BLONDE FACE | LATXA BLONDE FACE KT879022.1 | BLDF01 |
|                   | LATXA BLONDE FACE KT879030.1 | BLDF02 |
|                   | LATXA BLONDE FACE KT879036.1 | BLDF03 |
|                   | LATXA BLONDE FACE KT879040.1 | BLDF04 |
|                   | LATXA BLONDE FACE KT879042.1 | BLDF05 |
|                   | LATXA BLONDE FACE KT879043.1 | BLDF06 |
|                   | LATXA BLONDE FACE KT879046.1 | BLDF07 |
|                   | LATXA BLONDE FACE KT879083.1 | BLDF08 |
|                   | LATXA BLONDE FACE KT879085.1 | BLDF09 |
|                   | LATXA BLONDE FACE KT879095.1 | BLDF10 |
|                   | LATXA BLONDE FACE KT879101.1 | BLDF11 |
|                   | LATXA BLONDE FACE KT879118.1 | BLDF12 |
|                   | LATXA BLONDE FACE KT879126.1 | BLDF13 |
|                   | LATXA BLONDE FACE KT879134.1 | BLDF14 |

Karayaka

Lacaune of Italy

Merinizzata Italiana

|                                 |        |
|---------------------------------|--------|
| KARAYAKA JN574266.1             | KARY08 |
| KARAYAKA JN574267.1             | KARY09 |
| KARAYAKA JN574268.1             | KARY10 |
| KARAYAKA JN574269.1             | KARY11 |
| KARAYAKA KF677024.1             | KARY12 |
| KARAYAKA KF677025.1             | KARY13 |
| KARAYAKA KF677026.1             | KARY14 |
| KARAYAKA KF677028.1             | KARY15 |
| KARAYAKA KF677029.1             | KARY16 |
| KARAYAKA KF677030.1             | KARY17 |
| KARAYAKA KF677031.1             | KARY18 |
| KARAYAKA KF677032.1             | KARY19 |
| KARAYAKA KF677033.1             | KARY20 |
| KARAYAKA KF677034.1             | KARY21 |
| KARAYAKA KF677035.1             | KARY22 |
| KARAYAKA KF677036.1             | KARY23 |
| KARAYAKA KF677037.1             | KARY24 |
| KARAYAKA KF677038.1             | KARY25 |
| KARAYAKA MG209458.1             | KARY26 |
| KARAYAKA MG209461.1             | KARY27 |
| KARAYAKA MG209462.1             | KARY28 |
| KARAYAKA MG209465.1             | KARY29 |
| KARAYAKA MG209466.1             | KARY30 |
| LACAUNE OF ITALY KF228745.1     | LACA01 |
| LACAUNE OF ITALY KF228746.1     | LACA02 |
| LACAUNE OF ITALY KF228763.1     | LACA03 |
| LACAUNE OF ITALY KF228766.1     | LACA04 |
| LACAUNE OF ITALY KF228769.1     | LACA05 |
| LACAUNE OF ITALY KF228770.1     | LACA06 |
| LACAUNE OF ITALY KF228771.1     | LACA07 |
| LACAUNE OF ITALY KF228772.1     | LACA08 |
| LACAUNE OF ITALY KF228773.1     | LACA09 |
| LACAUNE OF ITALY KF228774.1     | LACA10 |
| LACAUNE OF ITALY KF228775.1     | LACA11 |
| LACAUNE OF ITALY KF228776.1     | LACA12 |
| LACAUNE OF ITALY KF228777.1     | LACA13 |
| LACAUNE OF ITALY KF228779.1     | LACA14 |
| LACAUNE OF ITALY KF228785.1     | LACA15 |
| LACAUNE OF ITALY KF228786.1     | LACA16 |
| LACAUNE OF ITALY KF228787.1     | LACA17 |
| LACAUNE OF ITALY KF228788.1     | LACA18 |
| LACAUNE OF ITALY KF228789.1     | LACA19 |
| LACAUNE OF ITALY KF228790.1     | LACA20 |
| LACAUNE OF ITALY KF228791.1     | LACA21 |
| LACAUNE OF ITALY KF228792.1     | LACA22 |
| LACAUNE OF ITALY KF228793.1     | LACA23 |
| LACAUNE OF ITALY KF228794.1     | LACA24 |
| LACAUNE OF ITALY KF228795.1     | LACA25 |
| LACAUNE OF ITALY KF228796.1     | LACA26 |
| LACAUNE OF ITALY KF228797.1     | LACA27 |
| LACAUNE OF ITALY KF302447.1     | LACA28 |
| LACAUNE OF ITALY KF302453.1     | LACA29 |
| LACAUNE OF ITALY KF302460.1     | LACA30 |
| MERINIZZATA ITALIANA KF228640.1 | MRNZ01 |
| MERINIZZATA ITALIANA KF228641.1 | MRNZ02 |
| MERINIZZATA ITALIANA KF228642.1 | MRNZ03 |
| MERINIZZATA ITALIANA KF228643.1 | MRNZ04 |
| MERINIZZATA ITALIANA KF228644.1 | MRNZ05 |
| MERINIZZATA ITALIANA KF228645.1 | MRNZ06 |
| MERINIZZATA ITALIANA KF228646.1 | MRNZ07 |
| MERINIZZATA ITALIANA KF228647.1 | MRNZ08 |
| MERINIZZATA ITALIANA KF228648.1 | MRNZ09 |
| MERINIZZATA ITALIANA KF228649.1 | MRNZ10 |
| MERINIZZATA ITALIANA KF228650.1 | MRNZ11 |
| MERINIZZATA ITALIANA KF228651.1 | MRNZ12 |
| MERINIZZATA ITALIANA KF228652.1 | MRNZ13 |
| MERINIZZATA ITALIANA KF228653.1 | MRNZ14 |
| MERINIZZATA ITALIANA KF228654.1 | MRNZ15 |
| MERINIZZATA ITALIANA KF228655.1 | MRNZ16 |
| MERINIZZATA ITALIANA KF228656.1 | MRNZ17 |
| MERINIZZATA ITALIANA KF228657.1 | MRNZ18 |
| MERINIZZATA ITALIANA KF228658.1 | MRNZ19 |
| MERINIZZATA ITALIANA KF228659.1 | MRNZ20 |
| MERINIZZATA ITALIANA KF228660.1 | MRNZ21 |
| MERINIZZATA ITALIANA KF228661.1 | MRNZ22 |
| MERINIZZATA ITALIANA KF228662.1 | MRNZ23 |
| MERINIZZATA ITALIANA KF228663.1 | MRNZ24 |
| MERINIZZATA ITALIANA KF228664.1 | MRNZ25 |
| MERINIZZATA ITALIANA KF228665.1 | MRNZ26 |
| MERINIZZATA ITALIANA KF228666.1 | MRNZ27 |
| MERINIZZATA ITALIANA KF228667.1 | MRNZ28 |
| MERINIZZATA ITALIANA KF302446.1 | MRNZ29 |
| MERINIZZATA ITALIANA KF302459.1 | MRNZ30 |
| MORKARAMAN HM236179.1 C         | MORK01 |
| MORKARAMAN HM236181.1 D         | MORK02 |
| MORKARAMAN JN574160.1           | MORK03 |
| MORKARAMAN JN574161.1           | MORK04 |
| MORKARAMAN JN574162.1           | MORK05 |
| MORKARAMAN JN574163.1           | MORK06 |
| MORKARAMAN JN574164.1           | MORK07 |
| MORKARAMAN JN574165.1           | MORK08 |
| MORKARAMAN JN574166.1           | MORK09 |
| MORKARAMAN JN574167.1           | MORK10 |



|                              |                              |                    |       |
|------------------------------|------------------------------|--------------------|-------|
| Latxa Blonde Face            | LATXA BLONDE FACE KT879138.1 | BLDF15             |       |
|                              | LATXA BLONDE FACE KT879141.1 | BLDF16             |       |
|                              | LATXA BLONDE FACE KT879147.1 | BLDF17             |       |
|                              | LATXA BLONDE FACE KT879148.1 | BLDF18             |       |
|                              | LATXA BLONDE FACE KT879149.1 | BLDF19             |       |
|                              | LATXA BLONDE FACE KT879150.1 | BLDF20             |       |
|                              | LATXA BLONDE FACE KT879151.1 | BLDF21             |       |
|                              | LATXA BLONDE FACE KT879152.1 | BLDF22             |       |
|                              | LATXA BLONDE FACE KT879153.1 | BLDF23             |       |
|                              | LATXA BLONDE FACE KT879155.1 | BLDF24             |       |
|                              | LATXA BLONDE FACE KT879169.1 | BLDF25             |       |
|                              | LATXA BLONDE FACE KT879170.1 | BLDF26             |       |
|                              | LATXA BLONDE FACE KT879171.1 | BLDF27             |       |
|                              | LATXA BLONDE FACE KT879172.1 | BLDF28             |       |
|                              | LATXA BLONDE FACE KT879173.1 | BLDF29             |       |
| LATXA BLONDE FACE KT879184.1 | BLDF30                       |                    |       |
| LATXA BLONDE FACE KT879185.1 | BLDF31                       |                    |       |
| Latxa Black Face             | LATXA BLACK FACE KT879022.1  | BLKF01             |       |
|                              | LATXA BLACK FACE KT879038.1  | BLKF02             |       |
|                              | LATXA BLACK FACE KT879073.1  | BLKF03             |       |
|                              | LATXA BLACK FACE KT879099.1  | BLKF04             |       |
|                              | LATXA BLACK FACE KT879134.1  | BLKF05             |       |
|                              | LATXA BLACK FACE KT879136.1  | BLKF06             |       |
|                              | LATXA BLACK FACE KT879146.1  | BLKF07             |       |
|                              | LATXA BLACK FACE KT879154.1  | BLKF08             |       |
|                              | LATXA BLACK FACE KT879156.1  | BLKF09             |       |
|                              | LATXA BLACK FACE KT879157.1  | BLKF10             |       |
|                              | LATXA BLACK FACE KT879158.1  | BLKF11             |       |
|                              | LATXA BLACK FACE KT879159.1  | BLKF12             |       |
|                              | LATXA BLACK FACE KT879160.1  | BLKF13             |       |
|                              | LATXA BLACK FACE KT879161.1  | BLKF14             |       |
|                              | LATXA BLACK FACE KT879162.1  | BLKF15             |       |
|                              | LATXA BLACK FACE KT879163.1  | BLKF16             |       |
|                              | LATXA BLACK FACE KT879164.1  | BLKF17             |       |
|                              | LATXA BLACK FACE KT879165.1  | BLKF18             |       |
|                              | LATXA BLACK FACE KT879166.1  | BLKF19             |       |
|                              | LATXA BLACK FACE KT879167.1  | BLKF20             |       |
|                              | LATXA BLACK FACE KT879168.1  | BLKF21             |       |
|                              | LATXA BLACK FACE KT879174.1  | BLKF22             |       |
|                              | LATXA BLACK FACE KT879175.1  | BLKF23             |       |
|                              | LATXA BLACK FACE KT879176.1  | BLKF24             |       |
|                              | LATXA BLACK FACE KT879178.1  | BLKF25             |       |
|                              | LATXA BLACK FACE KT879179.1  | BLKF26             |       |
|                              | LATXA BLACK FACE KT879180.1  | BLKF27             |       |
|                              | LATXA BLACK FACE KT879181.1  | BLKF28             |       |
|                              | LATXA BLACK FACE KT879182.1  | BLKF29             |       |
|                              | LATXA BLACK FACE KT879183.1  | BLKF30             |       |
|                              | LATXA BLACK FACE KT879186.1  | BLKF31             |       |
| Blanche de Montagne          | BLANCHE DE MONTAGNE MN229116 | BLM01              |       |
|                              | BLANCHE DE MONTAGNE MN229117 | BLM02              |       |
|                              | BLANCHE DE MONTAGNE MN229118 | BLM03              |       |
|                              | BLANCHE DE MONTAGNE MN229119 | BLM04              |       |
|                              | BLANCHE DE MONTAGNE MN229120 | BLM05              |       |
|                              | BLANCHE DE MONTAGNE MN229121 | BLM06              |       |
|                              | BLANCHE DE MONTAGNE MN229122 | BLM07              |       |
|                              | BLANCHE DE MONTAGNE MN229123 | BLM08              |       |
|                              | BLANCHE DE MONTAGNE MN229124 | BLM09              |       |
|                              | BLANCHE DE MONTAGNE MN229125 | BLM10              |       |
|                              | BLANCHE DE MONTAGNE MN229126 | BLM11              |       |
|                              | BLANCHE DE MONTAGNE MN229127 | BLM12              |       |
|                              | BLANCHE DE MONTAGNE MN229128 | BLM13              |       |
|                              | BLANCHE DE MONTAGNE MN229129 | BLM14              |       |
|                              | BLANCHE DE MONTAGNE MN229130 | BLM15              |       |
|                              | BLANCHE DE MONTAGNE MN229131 | BLM16              |       |
|                              | BLANCHE DE MONTAGNE MN229132 | BLM17              |       |
|                              | BLANCHE DE MONTAGNE MN229133 | BLM18              |       |
|                              | BLANCHE DE MONTAGNE MN229134 | BLM19              |       |
|                              | BLANCHE DE MONTAGNE MN229135 | BLM20              |       |
|                              | BLANCHE DE MONTAGNE MN229136 | BLM21              |       |
|                              | BLANCHE DE MONTAGNE MN229137 | BLM22              |       |
|                              | BLANCHE DE MONTAGNE MN229138 | BLM23              |       |
|                              | BLANCHE DE MONTAGNE MN229139 | BLM24              |       |
|                              | BLANCHE DE MONTAGNE MN229140 | BLM25              |       |
|                              | BLANCHE DE MONTAGNE MN229141 | BLM26              |       |
|                              | BLANCHE DE MONTAGNE MN229142 | BLM27              |       |
|                              | BLANCHE DE MONTAGNE MN229143 | BLM28              |       |
|                              | BLANCHE DE MONTAGNE MN229144 | BLM29              |       |
|                              | BLANCHE DE MONTAGNE MN229145 | BLM30              |       |
|                              | BLANCHE DE MONTAGNE MN229146 | BLM31              |       |
|                              | BLANCHE DE MONTAGNE MN229147 | BLM32              |       |
|                              | BENI-GUIL MN229148           | BENI-GUIL MN229148 | BNG01 |
|                              |                              | BENI-GUIL MN229149 | BNG02 |
| BENI-GUIL MN229150           |                              | BNG03              |       |
| BENI-GUIL MN229151           |                              | BNG04              |       |
| BENI-GUIL MN229152           |                              | BNG05              |       |
| BENI-GUIL MN229153           |                              | BNG06              |       |
| BENI-GUIL MN229154           |                              | BNG07              |       |
| BENI-GUIL MN229155           |                              | BNG08              |       |
| BENI-GUIL MN229156           |                              | BNG09              |       |
| BENI-GUIL MN229157           |                              | BNG10              |       |
| BENI-GUIL MN229158           |                              | BNG11              |       |
| BENI-GUIL MN229159           |                              | BNG12              |       |
| BENI-GUIL MN229160           |                              | BNG13              |       |

Morkaraman

Norduz

Salovia

Sarda

|                       |        |
|-----------------------|--------|
| MORKARAMAN KF677238.1 | MORK11 |
| MORKARAMAN KF677239.1 | MORK12 |
| MORKARAMAN KF677240.1 | MORK13 |
| MORKARAMAN KF677241.1 | MORK14 |
| MORKARAMAN KF677242.1 | MORK15 |
| MORKARAMAN KF677243.1 | MORK16 |
| MORKARAMAN KF677244.1 | MORK17 |
| MORKARAMAN KF677245.1 | MORK18 |
| MORKARAMAN KF677246.1 | MORK19 |
| MORKARAMAN KF677247.1 | MORK20 |
| MORKARAMAN KF677248.1 | MORK21 |
| MORKARAMAN KF677249.1 | MORK22 |
| MORKARAMAN KF677250.1 | MORK23 |
| MORKARAMAN KF677251.1 | MORK24 |
| MORKARAMAN KF677252.1 | MORK25 |
| MORKARAMAN KF677253.1 | MORK26 |
| MORKARAMAN KF677254.1 | MORK27 |
| MORKARAMAN KF677255.1 | MORK28 |
| MORKARAMAN KF677256.1 | MORK29 |
| MORKARAMAN KF677257.1 | MORK30 |
| MORKARAMAN KF677258.1 | MORK31 |
| MORKARAMAN KF677259.1 | MORK32 |
| MORKARAMAN KF677260.1 | MORK33 |
| MORKARAMAN KF677261.1 | MORK34 |
| MORKARAMAN KF677262.1 | MORK35 |
| MORKARAMAN KF677263.1 | MORK36 |
| NORDUZ KF677193.1     | NORD01 |
| NORDUZ KF677199.1     | NORD02 |
| NORDUZ KF677200.1     | NORD03 |
| NORDUZ KF677201.1     | NORD04 |
| NORDUZ KF677202.1     | NORD05 |
| NORDUZ KF677203.1     | NORD06 |
| NORDUZ KF677204.1     | NORD07 |
| NORDUZ KF677205.1     | NORD08 |
| NORDUZ KF677206.1     | NORD09 |
| NORDUZ KF677207.1     | NORD10 |
| NORDUZ KF677208.1     | NORD11 |
| NORDUZ KF677209.1     | NORD12 |
| NORDUZ KF677210.1     | NORD13 |
| SALOVIA DQ491579.1    | SALO01 |
| SALOVIA DQ491597.1    | SALO02 |
| SALOVIA DQ491599.1    | SALO03 |
| SALOVIA DQ491604.1    | SALO04 |
| SALOVIA DQ491608.1    | SALO05 |
| SALOVIA DQ491610.1    | SALO06 |
| SALOVIA DQ491615.1    | SALO07 |
| SALOVIA DQ491617.1    | SALO08 |
| SALOVIA DQ491622.1    | SALO09 |
| SALOVIA DQ491623.1    | SALO10 |
| SALOVIA DQ491627.1    | SALO11 |
| SALOVIA DQ491628.1    | SALO12 |
| SALOVIA DQ491630.1    | SALO13 |
| SALOVIA DQ491632.1    | SALO14 |
| SALOVIA DQ491634.1    | SALO15 |
| SALOVIA DQ491637.1    | SALO16 |
| SALOVIA DQ491644.1    | SALO17 |
| SALOVIA DQ491648.1    | SALO18 |
| SALOVIA DQ491669.1    | SALO19 |
| SALOVIA DQ491670.1    | SALO20 |
| SALOVIA DQ491676.1    | SALO21 |
| SALOVIA DQ491677.1    | SALO22 |
| SALOVIA DQ491679.1    | SALO23 |
| SALOVIA DQ491691.1    | SALO24 |
| SALOVIA DQ491693.1    | SALO25 |
| SALOVIA DQ491694.1    | SALO26 |
| SALOVIA DQ491697.1    | SALO27 |
| SALOVIA DQ491703.1    | SALO28 |
| SALOVIA DQ491710.1    | SALO29 |
| SALOVIA DQ491715.1    | SALO30 |
| SARDA KF228824.1      | SRDA01 |
| SARDA KF228825.1      | SRDA02 |
| SARDA KF228826.1      | SRDA03 |
| SARDA KF228827.1      | SRDA04 |
| SARDA KF228828.1      | SRDA05 |
| SARDA KF228829.1      | SRDA06 |
| SARDA KF228830.1      | SRDA07 |
| SARDA KF228831.1      | SRDA08 |
| SARDA KF228832.1      | SRDA09 |
| SARDA KF228833.1      | SRDA10 |
| SARDA KF228834.1      | SRDA11 |
| SARDA KF228835.1      | SRDA12 |
| SARDA KF228836.1      | SRDA13 |
| SARDA KF228837.1      | SRDA14 |
| SARDA KF228838.1      | SRDA15 |
| SARDA KF228839.1      | SRDA16 |
| SARDA KF228840.1      | SRDA17 |
| SARDA KF228841.1      | SRDA18 |
| SARDA KF228842.1      | SRDA19 |
| SARDA KF228843.1      | SRDA20 |
| SARDA KF228844.1      | SRDA21 |
| SARDA KF228845.1      | SRDA22 |
| SARDA KF228846.1      | SRDA23 |
| SARDA KF228847.1      | SRDA24 |

|                        |                                   |        |                |                           |        |
|------------------------|-----------------------------------|--------|----------------|---------------------------|--------|
| Beni-Guil              | BENI-GUIL MN229161                | BNG14  |                | SARDA KF228848.1          | SRDA25 |
|                        | BENI-GUIL MN229162                | BNG15  |                | SARDA KF228849.1          | SRDA26 |
|                        | BENI-GUIL MN229163                | BNG16  |                | SARDA KF228850.1          | SRDA27 |
|                        | BENI-GUIL MN229164                | BNG17  |                | SARDA KF228851.1          | SRDA28 |
|                        | BENI-GUIL MN229165                | BNG18  |                | SARDA KF228852.1          | SRDA29 |
|                        | BENI-GUIL MN229166                | BNG19  |                | SARDA KF228853.1          | SRDA30 |
|                        | BENI-GUIL MN229167                | BNG20  |                | SARDI MN229208            | SRDI01 |
|                        | BENI-GUIL MN229168                | BNG21  |                | SARDI MN229209            | SRDI02 |
|                        | BENI-GUIL MN229169                | BNG22  |                | SARDI MN229210            | SRDI03 |
|                        | BENI-GUIL MN229170                | BNG23  |                | SARDI MN229211            | SRDI04 |
|                        | BENI-GUIL MN229171                | BNG24  |                | SARDI MN229212            | SRDI05 |
|                        | BENI-GUIL MN229172                | BNG25  |                | SARDI MN229213            | SRDI06 |
|                        | BENI-GUIL MN229173                | BNG26  |                | SARDI MN229214            | SRDI07 |
|                        | BENI-GUIL MN229174                | BNG27  |                | SARDI MN229215            | SRDI08 |
|                        | BENI-GUIL MN229175                | BNG28  |                | SARDI MN229216            | SRDI09 |
|                        | BENI-GUIL MN229176                | BNG29  |                | SARDI MN229217            | SRDI10 |
|                        | BENI-GUIL MN229177                | BNG30  |                | SARDI MN229218            | SRDI11 |
|                        | BENI-GUIL MN229178                | BNG31  |                | SARDI MN229219            | SRDI12 |
| Churra de Terra Quente | CHURRA DE TERRA QUENTE DQ491706.1 | CTQ01  | Sadri          | SARDI MN229220            | SRDI13 |
|                        | CHURRA DE TERRA QUENTE DQ491581.1 | CTQ02  |                | SARDI MN229221            | SRDI14 |
|                        | CHURRA DE TERRA QUENTE DQ491583.1 | CTQ03  |                | SARDI MN229222            | SRDI15 |
|                        | CHURRA DE TERRA QUENTE DQ491584.1 | CTQ04  |                | SARDI MN229223            | SRDI16 |
|                        | CHURRA DE TERRA QUENTE DQ491588.1 | CTQ05  |                | SARDI MN229224            | SRDI17 |
|                        | CHURRA DE TERRA QUENTE DQ491596.1 | CTQ06  |                | SARDI MN229225            | SRDI18 |
|                        | CHURRA DE TERRA QUENTE DQ491609.1 | CTQ07  |                | SARDI MN229226            | SRDI19 |
|                        | CHURRA DE TERRA QUENTE DQ491614.1 | CTQ08  |                | SARDI MN229227            | SRDI20 |
|                        | CHURRA DE TERRA QUENTE DQ491620.1 | CTQ09  |                | SARDI MN229228            | SRDI21 |
|                        | CHURRA DE TERRA QUENTE DQ491624.1 | CTQ10  |                | SARDI MN229229            | SRDI22 |
|                        | CHURRA DE TERRA QUENTE DQ491631.1 | CTQ11  |                | SARDI MN229230            | SRDI23 |
|                        | CHURRA DE TERRA QUENTE DQ491636.1 | CTQ12  |                | SARDI MN229231            | SRDI24 |
|                        | CHURRA DE TERRA QUENTE DQ491638.1 | CTQ13  |                | SARDI MN229232            | SRDI25 |
|                        | CHURRA DE TERRA QUENTE DQ491640.1 | CTQ14  |                | SARDI MN229233            | SRDI26 |
|                        | CHURRA DE TERRA QUENTE DQ491645.1 | CTQ15  |                | SARDI MN229234            | SRDI27 |
|                        | CHURRA DE TERRA QUENTE DQ491650.1 | CTQ16  |                | SARDI MN229235            | SRDI28 |
|                        | CHURRA DE TERRA QUENTE DQ491666.1 | CTQ17  |                | SARDI MN229236            | SRDI29 |
|                        | CHURRA DE TERRA QUENTE DQ491672.1 | CTQ18  |                | SARDI MN229237            | SRDI30 |
|                        | CHURRA DE TERRA QUENTE DQ491673.1 | CTQ19  |                | SARDI MN229238            | SRDI31 |
|                        | CHURRA DE TERRA QUENTE DQ491674.1 | CTQ20  |                | SARDI MN229239            | SRDI32 |
|                        | CHURRA DE TERRA QUENTE DQ491696.1 | CTQ21  |                | SARDI MN229240            | SRDI33 |
|                        | CHURRA DE TERRA QUENTE DQ491701.1 | CTQ22  |                | SOPRAVISSANA KF228586.1   | SOPR01 |
|                        | CHURRA DE TERRA QUENTE DQ491705.1 | CTQ23  |                | SOPRAVISSANA KF228587.1   | SOPR02 |
|                        | CHURRA DE TERRA QUENTE DQ491707.1 | CTQ24  |                | SOPRAVISSANA KF228588.1   | SOPR03 |
|                        | CHURRA DE TERRA QUENTE DQ491716.1 | CTQ25  |                | SOPRAVISSANA KF228589.1   | SOPR04 |
| Campaniça              | CAMPANICA DQ491595.1              | CAMP01 | Sopravissana   | SOPRAVISSANA KF228590.1   | SOPR05 |
|                        | CAMPANICA DQ491602.1              | CAMP02 |                | SOPRAVISSANA KF228591.1   | SOPR06 |
|                        | CAMPANICA DQ491611.1              | CAMP03 |                | SOPRAVISSANA KF228592.1   | SOPR07 |
|                        | CAMPANICA DQ491612.1              | CAMP04 |                | SOPRAVISSANA KF228593.1   | SOPR08 |
|                        | CAMPANICA DQ491618.1              | CAMP05 |                | SOPRAVISSANA KF228594.1   | SOPR09 |
|                        | CAMPANICA DQ491619.1              | CAMP06 |                | SOPRAVISSANA KF228595.1   | SOPR10 |
|                        | CAMPANICA DQ491621.1              | CAMP07 |                | SOPRAVISSANA KF228596.1   | SOPR11 |
|                        | CAMPANICA DQ491655.1              | CAMP08 |                | SOPRAVISSANA KF228597.1   | SOPR12 |
|                        | CAMPANICA DQ491657.1              | CAMP09 |                | SOPRAVISSANA KF228598.1   | SOPR13 |
|                        | CAMPANICA DQ491659.1              | CAMP10 |                | SOPRAVISSANA KF228599.1   | SOPR14 |
|                        | CAMPANICA DQ491662.1              | CAMP11 |                | SOPRAVISSANA KF228600.1   | SOPR15 |
|                        | CAMPANICA DQ491667.1              | CAMP12 |                | SOPRAVISSANA KF228601.1   | SOPR16 |
|                        | CAMPANICA DQ491668.1              | CAMP13 |                | SOPRAVISSANA KF228602.1   | SOPR17 |
|                        | CAMPANICA DQ491680.1              | CAMP14 |                | SOPRAVISSANA KF228603.1   | SOPR18 |
|                        | CAMPANICA DQ491681.1              | CAMP15 |                | SOPRAVISSANA KF228604.1   | SOPR19 |
|                        | CAMPANICA DQ491695.1              | CAMP16 |                | SOPRAVISSANA KF228605.1   | SOPR20 |
|                        | CAMPANICA DQ491698.1              | CAMP17 |                | SOPRAVISSANA KF228606.1   | SOPR21 |
|                        | CAMPANICA DQ491709.1              | CAMP18 |                | SOPRAVISSANA KF228607.1   | SOPR22 |
|                        | CAMPANICA DQ491729.1              | CAMP19 |                | SOPRAVISSANA KF228608.1   | SOPR23 |
|                        | CAMPANICA DQ491731.1              | CAMP20 |                | SOPRAVISSANA KF228609.1   | SOPR24 |
| Comisana               | COMISANA KF228724.1               | COMI01 | Spanish Merino | SOPRAVISSANA KF228610.1   | SOPR25 |
|                        | COMISANA KF302445.1               | COMI02 |                | SOPRAVISSANA KF228611.1   | SOPR26 |
|                        | COMISANA KF302452.1               | COMI03 |                | SOPRAVISSANA KF302449.1   | SOPR27 |
|                        | COMISANA KF302462.1               | COMI04 |                | SOPRAVISSANA KF302454.1   | SOPR28 |
|                        | COMISANA KF228695.1               | COMI05 |                | SOPRAVISSANA KF302456.1   | SOPR29 |
|                        | COMISANA KF228696.1               | COMI06 |                | SOPRAVISSANA KF302458.1   | SOPR30 |
|                        | COMISANA KF228698.1               | COMI07 |                | SPANISH MERINI KF228798.1 | SPAN01 |
|                        | COMISANA KF228699.1               | COMI08 |                | SPANISH MERINI KF228799.1 | SPAN02 |
|                        | COMISANA KF228700.1               | COMI09 |                | SPANISH MERINI KF228800.1 | SPAN03 |
|                        | COMISANA KF228703.1               | COMI10 |                | SPANISH MERINI KF228801.1 | SPAN04 |
|                        | COMISANA KF228704.1               | COMI11 |                | SPANISH MERINI KF228802.1 | SPAN05 |
|                        | COMISANA KF228705.1               | COMI12 |                | SPANISH MERINI KF228803.1 | SPAN06 |
|                        | COMISANA KF228706.1               | COMI13 |                | SPANISH MERINI KF228804.1 | SPAN07 |
|                        | COMISANA KF228709.1               | COMI14 |                | SPANISH MERINI KF228805.1 | SPAN08 |
|                        | COMISANA KF228710.1               | COMI15 |                | SPANISH MERINI KF228806.1 | SPAN09 |
|                        | COMISANA KF228711.1               | COMI16 |                | SPANISH MERINI KF228807.1 | SPAN10 |
|                        | COMISANA KF228713.1               | COMI17 |                | SPANISH MERINI KF228808.1 | SPAN11 |
|                        | COMISANA KF228714.1               | COMI18 |                | SPANISH MERINI KF228809.1 | SPAN12 |
|                        | COMISANA KF228715.1               | COMI19 |                | SPANISH MERINI KF228810.1 | SPAN13 |
|                        | COMISANA KF228717.1               | COMI20 |                | SPANISH MERINI KF228811.1 | SPAN14 |
|                        | COMISANA KF228718.1               | COMI21 |                | SPANISH MERINI KF228812.1 | SPAN15 |
|                        | COMISANA KF228719.1               | COMI22 |                | SPANISH MERINI KF228813.1 | SPAN16 |
|                        | COMISANA KF228720.1               | COMI23 |                | SPANISH MERINI KF228814.1 | SPAN17 |
|                        | COMISANA KF228721.1               | COMI24 |                | SPANISH MERINI KF228815.1 | SPAN18 |
|                        | COMISANA KF228722.1               | COMI25 |                | SPANISH MERINI KF228816.1 | SPAN19 |
|                        | COMISANA KF228723.1               | COMI26 |                | SPANISH MERINI KF228817.1 | SPAN20 |
|                        | COMISANA KF228725.1               | COMI27 |                | SPANISH MERINI KF228818.1 | SPAN21 |
|                        | COMISANA KF228726.1               | COMI28 |                | SPANISH MERINI KF228819.1 | SPAN22 |
|                        | COMISANA KF228727.1               | COMI29 |                | SPANISH MERINI KF228820.1 | SPAN23 |
|                        | COMISANA KF228730.1               | COMI30 |                | SPANISH MERINI KF228821.1 | SPAN24 |

|               |                   |               |                    |                           |                    |
|---------------|-------------------|---------------|--------------------|---------------------------|--------------------|
| Daglic        | DAGLIC KF677087.1 | DAGL01        | Timahdite          | SPANISH MERINI KF228822.1 | SPAN25             |
|               | DAGLIC JN574148.1 | DAGL02        |                    | SPANISH MERINI KF228823.1 | SPAN26             |
|               | DAGLIC JN574149.1 | DAGL03        |                    | TIMAHDITE MN229241        | TIM01              |
|               | DAGLIC JN574150.1 | DAGL04        |                    | TIMAHDITE MN229242        | TIM02              |
|               | DAGLIC JN574151.1 | DAGL05        |                    | TIMAHDITE MN229243        | TIM03              |
|               | DAGLIC JN574152.1 | DAGL06        |                    | TIMAHDITE MN229244        | TIM04              |
|               | DAGLIC JN574153.1 | DAGL07        |                    | TIMAHDITE MN229245        | TIM05              |
|               | DAGLIC JN574262.1 | DAGL08        |                    | TIMAHDITE MN229246        | TIM06              |
|               | DAGLIC JN574263.1 | DAGL09        |                    | TIMAHDITE MN229247        | TIM07              |
|               | DAGLIC JN574264.1 | DAGL10        |                    | TIMAHDITE MN229248        | TIM08              |
|               | DAGLIC JN574285.1 | DAGL11        |                    | TIMAHDITE MN229249        | TIM09              |
|               | DAGLIC JN574286.1 | DAGL13        |                    | TIMAHDITE MN229250        | TIM10              |
|               | DAGLIC KF677071.1 | DAGL14        |                    | TIMAHDITE MN229251        | TIM11              |
|               | DAGLIC KF677072.1 | DAGL15        |                    | TIMAHDITE MN229252        | TIM12              |
|               | DAGLIC KF677073.1 | DAGL16        |                    | TIMAHDITE MN229253        | TIM13              |
|               | DAGLIC KF677074.1 | DAGL17        |                    | TIMAHDITE MN229254        | TIM14              |
|               | DAGLIC KF677075.1 | DAGL18        |                    | TIMAHDITE MN229255        | TIM15              |
|               | DAGLIC KF677076.1 | DAGL19        |                    | TIMAHDITE MN229256        | TIM16              |
|               | DAGLIC KF677077.1 | DAGL20        |                    | TIMAHDITE MN229257        | TIM17              |
|               | DAGLIC KF677078.1 | DAGL21        |                    | TIMAHDITE MN229258        | TIM18              |
|               | DAGLIC KF677079.1 | DAGL22        |                    | TIMAHDITE MN229259        | TIM19              |
|               | DAGLIC KF677080.1 | DAGL23        |                    | TIMAHDITE MN229260        | TIM20              |
|               | DAGLIC KF677081.1 | DAGL24        |                    | TIMAHDITE MN229261        | TIM21              |
|               | DAGLIC KF677082.1 | DAGL25        |                    | TIMAHDITE MN229262        | TIM22              |
|               | DAGLIC KF677083.1 | DAGL26        |                    | TIMAHDITE MN229263        | TIM23              |
|               | DAGLIC KF677084.1 | DAGL27        |                    | TIMAHDITE MN229264        | TIM24              |
|               | DAGLIC KF677085.1 | DAGL28        |                    | TIMAHDITE MN229265        | TIM25              |
|               | DAGLIC KF677086.1 | DAGL29        |                    | TIMAHDITE MN229266        | TIM26              |
|               | DAGLIC KF677088.1 | DAGL30        |                    | TIMAHDITE MN229267        | TIM27              |
|               | DAGLIC KF677089.1 | DAGL31        |                    | TIMAHDITE MN229268        | TIM28              |
|               | DAGLIC KF677090.1 | DAGL32        |                    | TIMAHDITE MN229269        | TIM29              |
|               | DAGLIC KF677091.1 | DAGL33        |                    | TIMAHDITE MN229270        | TIM30              |
|               | DAGLIC KF677092.1 | DAGL34        |                    | TIMAHDITE MN229271        | TIM31              |
|               | D'man             | DMAN MN229179 |                    | DMAN01                    | TIMAHDITE MN229272 |
| DMAN MN229180 |                   | DMAN02        | TIMAHDITE MN229273 | TIM33                     |                    |
| DMAN MN229181 |                   | DMAN03        | TIMAHDITE MN229274 | TIM34                     |                    |
| DMAN MN229182 |                   | DMAN04        | TIMAHDITE MN229275 | TIM35                     |                    |
| DMAN MN229183 |                   | DMAN05        | TIMAHDITE MN229276 | TIM36                     |                    |
| DMAN MN229184 |                   | DMAN06        | TIMAHDITE MN229277 | TIM37                     |                    |
| DMAN MN229185 |                   | DMAN07        |                    |                           |                    |
| DMAN MN229186 |                   | DMAN08        |                    |                           |                    |
| DMAN MN229187 |                   | DMAN09        |                    |                           |                    |
| DMAN MN229188 |                   | DMAN10        |                    |                           |                    |
| DMAN MN229189 |                   | DMAN11        |                    |                           |                    |
| DMAN MN229190 |                   | DMAN12        |                    |                           |                    |
| DMAN MN229191 |                   | DMAN13        |                    |                           |                    |
| DMAN MN229192 |                   | DMAN14        |                    |                           |                    |
| DMAN MN229193 |                   | DMAN15        |                    |                           |                    |
| DMAN MN229194 |                   | DMAN16        |                    |                           |                    |
| DMAN MN229195 |                   | DMAN17        |                    |                           |                    |
| DMAN MN229196 |                   | DMAN18        |                    |                           |                    |
| DMAN MN229197 |                   | DMAN19        |                    |                           |                    |
| DMAN MN229198 |                   | DMAN20        |                    |                           |                    |
| DMAN MN229199 |                   | DMAN21        |                    |                           |                    |
| DMAN MN229200 |                   | DMAN22        |                    |                           |                    |
| DMAN MN229201 |                   | DMAN23        |                    |                           |                    |
| DMAN MN229202 |                   | DMAN24        |                    |                           |                    |
| DMAN MN229203 |                   | DMAN25        |                    |                           |                    |
| DMAN MN229204 |                   | DMAN26        |                    |                           |                    |
| DMAN MN229205 |                   | DMAN27        |                    |                           |                    |
| DMAN MN229206 |                   | DMAN28        |                    |                           |                    |
| DMAN MN229207 |                   | DMAN29        |                    |                           |                    |

6. ANOVA results

| Source           | Type III SS    | df      | Mean Squares  | F-Ratio | p-Value |
|------------------|----------------|---------|---------------|---------|---------|
| <b>v(Alti)</b>   |                |         |               |         |         |
| <b>REGION</b>    | 10 788.328     | 2.000   | 5 394.164     | 84.356  | 0.000   |
| <b>Error</b>     | 14 131.844     | 221.000 | 63.945        |         |         |
| <b>lg(T max)</b> |                |         |               |         |         |
| <b>REGION</b>    | 0.575          | 2.000   | 0.287         | 109.465 | 0.000   |
| <b>Error</b>     | 0.580          | 221.000 | 0.003         |         |         |
| <b>T min</b>     |                |         |               |         |         |
| <b>REGION</b>    | 29.570         | 2.000   | 14.785        | 2.415   | 0.092   |
| <b>Error</b>     | 1 352.903      | 221.000 | 6.122         |         |         |
| <b>lg(M)</b>     |                |         |               |         |         |
| <b>REGION</b>    | 0.484          | 2.000   | 0.242         | 125.528 | 0.000   |
| <b>Error</b>     | 0.426          | 221.000 | 0.002         |         |         |
| <b>M - m</b>     |                |         |               |         |         |
| <b>REGION</b>    | 4 509.628      | 2.000   | 2 254.814     | 135.978 | 0.000   |
| <b>Error</b>     | 3 664.675      | 221.000 | 16.582        |         |         |
| <b>m</b>         |                |         |               |         |         |
| <b>REGION</b>    | 286.814        | 2.000   | 143.407       | 19.051  | 0.000   |
| <b>Error</b>     | 1 663.605      | 221.000 | 7.528         |         |         |
| <b>R</b>         |                |         |               |         |         |
| <b>REGION</b>    | 10 785 437.156 | 2.000   | 5 392 718.578 | 115.215 | 0.000   |
| <b>Error</b>     | 10 344 017.654 | 221.000 | 46 805.510    |         |         |
| <b>Q3</b>        |                |         |               |         |         |
| <b>REGION</b>    | 341 021.988    | 2.000   | 170 510.994   | 113.805 | 0.000   |
| <b>Error</b>     | 331 119.717    | 221.000 | 1 498.279     |         |         |

## 7. Climatic and genetic parameter

### Data

| Breeds                 | Climatic parameters |        |        |        |        |        |          |         | Genetic parameters |         |                |                |         |             |         |         |
|------------------------|---------------------|--------|--------|--------|--------|--------|----------|---------|--------------------|---------|----------------|----------------|---------|-------------|---------|---------|
|                        | Alti                | T max  | T min  | M      | M - m  | m      | R        | Q3      | Hd                 | $\pi$   | Fu and Li's F* | Fu and Li's D* | Fu's Fs | D of Tajima | $\tau$  | Shannon |
| Boujaad                | 648.333             | 26.390 | 11.087 | 38.933 | 35.500 | 3.433  | 461.244  | 44.575  | 0.994              | 0.02256 | -3.280         | -3.10524       | -18.224 | -2.111      | 7.48047 | 0.239   |
| Blanche de Montagne    | 1430.867            | 23.907 | 7.804  | 35.193 | 35.827 | -0.900 | 321.400  | 30.986  | 0.97               | 0.0133  | -3.016         | -2.9434        | -13.24  | -1.766      | 8.09375 | 0.139   |
| Beni-Guil              | 924.400             | 22.267 | 9.277  | 32.507 | 30.533 | 1.973  | 263.324  | 30.029  | 0.966              | 0.0164  | -2.931         | -2.74106       | -22.713 | -1.953      | 7.58984 | 0.143   |
| D'man                  | 998.250             | 28.099 | 12.448 | 40.400 | 38.513 | 1.888  | 110.227  | 9.859   | 0.963              | 0.01514 | -0.880         | -0.63376       | -7.424  | -1.744      | 9.5293  | 0.000   |
| Sardi                  | 430.158             | 25.299 | 11.667 | 34.868 | 30.021 | 4.847  | 334.088  | 38.380  | 0.994              | 0.02028 | -1.821         | -1.45748       | -18.582 | -1.692      | 7.12305 | 0.229   |
| Timahdite              | 1010.000            | 22.281 | 8.439  | 33.683 | 32.448 | 1.235  | 578.634  | 60.947  | 0.988              | 0.02151 | -2.502         | -2.2419        | -25.845 | -1.855      | 6.25391 | 0.281   |
| Campaniça              | 226.600             | 21.443 | 11.105 | 30.870 | 24.950 | 5.920  | 607.800  | 83.759  | 0.968              | 0.0207  | -1.04632       | -0.67904       | -2.651  | -1.29999    | 8.50977 | 0.000   |
| Churra Algarvia        | 82.900              | 21.347 | 12.271 | 28.520 | 20.920 | 7.600  | 509.100  | 83.758  | 0.98               | 0.01419 | -0.67085       | -0.41733       | -4.627  | -0.96957    | 9.32422 | 0.389   |
| Churra Badana          | 525.300             | 18.423 | 7.663  | 28.980 | 27.540 | 1.440  | 743.700  | 92.716  | 0.972              | 0.00924 | -2.42002       | -2.1754        | -15.157 | -1.80017    | 8.97656 | 0.000   |
| Churra de terra Quente | 515.600             | 18.529 | 7.956  | 28.980 | 27.140 | 1.840  | 839.600  | 106.337 | 0.994              | 0.01465 | -2.39266       | -2.12604       | -18.069 | -1.817      | 8.81836 | 0.168   |
| Latxa Black Face       | 328.364             | 16.988 | 8.642  | 24.682 | 21.345 | 3.336  | 1086.182 | 179.734 | 0.993              | 0.01783 | -2.57006       | -2.31506       | -11.269 | -1.90879    | 6.9082  | 0.143   |
| Latxa Blonde Face      | 222.818             | 17.770 | 9.216  | 25.327 | 21.173 | 4.155  | 1150.818 | 189.761 | 0.989              | 0.01325 | -1.76605       | -1.4832        | -8.782  | -1.58999    | 6.05469 | 0.000   |
| Saloiã                 | 169.727             | 19.686 | 11.842 | 26.709 | 19.473 | 7.236  | 742.091  | 136.118 | 0.995              | 0.01737 | -1.35743       | -0.92374       | -18.953 | -1.60424    | 8.1875  | 0.000   |
| Spanish Merino         | 404.750             | 22.340 | 10.570 | 34.313 | 30.650 | 3.663  | 533.625  | 60.140  | 1                  | 0.01391 | -2.52843       | -2.26675       | -22.036 | -1.89837    | 8.23633 | 0.245   |
| Appenninica            | 214.429             | 18.435 | 9.136  | 28.950 | 27.393 | 1.557  | 797.643  | 99.953  | 0.98               | 0.01436 | -1.82815       | -1.52735       | -8.197  | -1.59373    | 8.82812 | 0.000   |
| Comisana               | 328.650             | 19.586 | 12.040 | 28.815 | 23.140 | 5.675  | 693.750  | 103.559 | 0.94               | 0.03278 | 0.17612        | 0.00182        | -0.655  | 0.4461      | 5.25    | 0.580   |
| Gentile di Puglia      | 333.600             | 20.047 | 11.876 | 29.513 | 24.540 | 4.973  | 685.200  | 98.107  | 0.995              | 0.01466 | -2.17776       | -1.92966       | -19.863 | -1.66853    | 8.58398 | 0.000   |
| Merinizzata Italiana   | 370.800             | 18.745 | 10.276 | 28.675 | 25.765 | 2.910  | 686.350  | 91.774  | 1                  | 0.01247 | -2.15818       | -1.81381       | -29.76  | -1.85405    | 8.80664 | 0.146   |
| Sarda                  | 267.525             | 18.208 | 9.649  | 28.425 | 26.170 | 2.255  | 765.450  | 100.102 | 0.989              | 0.01723 | -2.12499       | -1.77277       | -12.742 | -1.84739    | 8.40234 | 0.000   |
| Sopravissana           | 264.962             | 18.254 | 9.268  | 28.631 | 26.835 | 1.796  | 831.308  | 106.283 | 0.977              | 0.0126  | -1.72346       | -1.45472       | -8.867  | -1.47031    | 9.17969 | 0.000   |

### Normalized Data

| Breeds                 | Climatic parameters |           |        |       |        |        |          |         | Genetic parameters |             |                |                |         |             |        |         |
|------------------------|---------------------|-----------|--------|-------|--------|--------|----------|---------|--------------------|-------------|----------------|----------------|---------|-------------|--------|---------|
|                        | v(Alti)             | lg(T max) | T min  | lg(M) | M - m  | m      | R        | Q3      | Hd                 | lg( $\pi$ ) | Fu and Li's F* | Fu and Li's D* | Fu's Fs | D of Tajima | $\tau$ | Shannon |
| Boujaad                | 25.462              | 1.421     | 11.087 | 1.590 | 35.500 | 3.433  | 461.244  | 44.575  | 0.994              | -1.647      | -3.280         | -3.105         | -18.224 | -2.111      | 7.480  | 0.239   |
| Blanche de Montagne    | 37.827              | 1.379     | 7.804  | 1.546 | 35.827 | -0.900 | 321.400  | 30.986  | 0.970              | -1.876      | -3.016         | -2.943         | -13.240 | -1.766      | 8.094  | 0.139   |
| Beni-Guil              | 30.404              | 1.348     | 9.277  | 1.512 | 30.533 | 1.973  | 263.324  | 30.029  | 0.966              | -1.785      | -2.931         | -2.741         | -22.713 | -1.953      | 7.590  | 0.143   |
| D'man                  | 31.595              | 1.449     | 12.448 | 1.606 | 38.513 | 1.888  | 110.227  | 9.859   | 0.963              | -1.820      | -0.880         | -0.634         | -7.424  | -1.744      | 9.529  | 0.000   |
| Sardi                  | 20.740              | 1.403     | 11.667 | 1.542 | 30.021 | 4.847  | 334.088  | 38.380  | 0.994              | -1.693      | -1.821         | -1.457         | -18.582 | -1.692      | 7.123  | 0.229   |
| Timahdite              | 31.780              | 1.348     | 8.439  | 1.527 | 32.448 | 1.235  | 578.634  | 60.947  | 0.988              | -1.667      | -2.502         | -2.242         | -25.845 | -1.855      | 6.254  | 0.281   |
| Campaniça              | 15.053              | 1.331     | 11.105 | 1.490 | 24.950 | 5.920  | 607.800  | 83.759  | 0.968              | -1.684      | -1.046         | -0.679         | -2.651  | -1.300      | 8.510  | 0.000   |
| Churra Algarvia        | 9.105               | 1.329     | 12.271 | 1.455 | 20.920 | 7.600  | 509.100  | 83.758  | 0.980              | -1.848      | -0.671         | -0.417         | -4.627  | -0.970      | 9.324  | 0.389   |
| Churra Badana          | 22.919              | 1.265     | 7.663  | 1.462 | 27.540 | 1.440  | 743.700  | 92.716  | 0.972              | -2.034      | -2.420         | -2.175         | -15.157 | -1.800      | 8.977  | 0.000   |
| Churra de terra Quente | 22.707              | 1.268     | 7.956  | 1.462 | 27.140 | 1.840  | 839.600  | 106.337 | 0.994              | -1.834      | -2.393         | -2.126         | -18.069 | -1.817      | 8.818  | 0.168   |
| Latxa Black Face       | 18.121              | 1.230     | 8.642  | 1.392 | 21.345 | 3.336  | 1086.182 | 179.734 | 0.993              | -1.749      | -2.570         | -2.315         | -11.269 | -1.909      | 6.908  | 0.143   |
| Latxa Blonde Face      | 14.927              | 1.250     | 9.216  | 1.404 | 21.173 | 4.155  | 1150.818 | 189.761 | 0.989              | -1.878      | -1.766         | -1.483         | -8.782  | -1.590      | 6.055  | 0.000   |
| Saloiã                 | 13.028              | 1.294     | 11.842 | 1.427 | 19.473 | 7.236  | 742.091  | 136.118 | 0.995              | -1.760      | -1.357         | -0.924         | -18.953 | -1.604      | 8.188  | 0.245   |
| Spanish Merino         | 20.118              | 1.349     | 10.570 | 1.535 | 30.650 | 3.663  | 533.625  | 60.140  | 1.000              | -1.857      | -2.528         | -2.267         | -22.036 | -1.898      | 8.236  | 0.000   |
| Appenninica            | 12.617              | 1.276     | 9.188  | 1.468 | 27.380 | 2.020  | 781.800  | 97.739  | 0.980              | -1.843      | -1.828         | -1.527         | -8.197  | -1.594      | 8.828  | 0.000   |
| Comisana               | 19.154              | 1.294     | 12.507 | 1.458 | 22.488 | 6.213  | 545.500  | 83.862  | 0.940              | -1.484      | 0.176          | 0.002          | -0.655  | 0.446       | 5.250  | 0.580   |
| Gentile di Puglia      | 16.544              | 1.260     | 11.064 | 1.446 | 22.986 | 4.957  | 540.571  | 110.600 | 0.995              | -1.834      | -2.178         | -1.930         | -19.863 | -1.669      | 8.584  | 0.000   |
| Merinizzata Italiana   | 19.256              | 1.273     | 10.276 | 1.458 | 25.765 | 2.910  | 686.350  | 91.774  | 1.000              | -1.904      | -2.158         | -1.814         | -29.760 | -1.854      | 8.807  | 0.146   |
| Sarda                  | 11.421              | 1.301     | 12.360 | 1.459 | 22.286 | 6.500  | 548.143  | 83.938  | 0.989              | -1.764      | -2.125         | -1.773         | -12.742 | -1.847      | 8.402  | 0.000   |
| Sopravissana           | 17.163              | 1.242     | 9.524  | 1.445 | 26.286 | 1.586  | 824.143  | 107.514 | 0.977              | -1.900      | -1.723         | -1.455         | -8.867  | -1.470      | 9.180  | 0.000   |

### Correlation table

|                | Climatic parameters |           |        |        |        |        |        |        | Genetic parameters |             |                |                |         |             |        |         |
|----------------|---------------------|-----------|--------|--------|--------|--------|--------|--------|--------------------|-------------|----------------|----------------|---------|-------------|--------|---------|
|                | v(Alti)             | lg(T max) | T min  | lg(M)  | M - m  | m      | R      | Q3     | Hd                 | lg( $\pi$ ) | Fu and Li's F* | Fu and Li's D* | Fu's Fs | D of Tajima | $\tau$ | Shannon |
| v(Alti)        | 0.000               | 0.010     | 0.071  | 0.001  | 0.000  | 0.000  | 0.019  | 0.004  | 0.285              | 0.925       | 0.046          | 0.020          | 0.151   | 0.217       | 0.563  | 0.849   |
| lg(T max)      | 0.559               | 0.000     | 0.129  | 0.000  | 0.000  | 0.650  | 0.000  | 0.000  | 0.499              | 0.185       | 0.798          | 0.745          | 0.757   | 0.522       | 0.909  | 0.517   |
| T min          | -0.412              | 0.351     | 0.000  | 0.498  | 0.423  | 0.000  | 0.068  | 0.373  | 0.606              | 0.036       | 0.003          | 0.002          | 0.224   | 0.066       | 0.886  | 0.227   |
| lg(M)          | 0.677               | 0.939     | 0.161  | 0.000  | 0.000  | 0.127  | 0.000  | 0.000  | 0.524              | 0.416       | 0.369          | 0.310          | 0.453   | 0.300       | 0.645  | 0.966   |
| M - m          | 0.839               | 0.775     | -0.190 | 0.920  | 0.000  | 0.001  | 0.002  | 0.000  | 0.557              | 0.941       | 0.076          | 0.052          | 0.287   | 0.092       | 0.593  | 0.570   |
| m              | -0.758              | -0.108    | 0.777  | -0.353 | -0.688 | 0.000  | 0.759  | 0.220  | 0.756              | 0.076       | 0.007          | 0.004          | 0.205   | 0.046       | 0.629  | 0.158   |
| R              | -0.519              | -0.841    | -0.416 | -0.817 | -0.650 | 0.073  | 0.000  | 0.000  | 0.146              | 0.347       | 0.895          | 0.994          | 0.651   | 0.986       | 0.425  | 0.501   |
| Q3             | -0.617              | -0.846    | -0.210 | -0.903 | -0.800 | 0.287  | 0.939  | 0.000  | 0.174              | 0.494       | 0.663          | 0.556          | 0.479   | 0.731       | 0.381  | 0.632   |
| Hd             | -0.251              | -0.160    | -0.123 | -0.151 | -0.140 | 0.074  | 0.337  | 0.316  | 0.000              | 0.224       | 0.017          | 0.057          | 0.002   | 0.001       | 0.514  | 0.222   |
| lg( $\pi$ )    | 0.023               | 0.309     | 0.472  | 0.193  | -0.018 | 0.406  | -0.222 | -0.162 | -0.285             | 0.000       | 0.164          | 0.248          | 0.388   | 0.028       | 0.002  | 0.002   |
| Fu and Li's F* | -0.451              | -0.061    | 0.629  | -0.212 | -0.405 | 0.585  | -0.032 | 0.104  | -0.525             | 0.324       | 0.000          | 0.000          | 0.001   | 0.000       | 0.871  | 0.112   |
| Fu and Li's D* | -0.516              | -0.078    | 0.642  | -0.239 | -0.440 | 0.621  | 0.002  | 0.140  | -0.432             | 0.271       | 0.989          | 0.000          | 0.003   | 0.000       | 0.900  | 0.212   |
| Fu's Fs        | -0.333              | -0.074    | 0.285  | -0.178 | -0.250 | 0.296  | 0.108  | 0.168  | -0.639             | 0.204       | 0.674          | 0.636          | 0.000   | 0.002       | 0.942  | 0.713   |
| D of Tajima    | -0.289              | -0.152    | 0.419  | -0.244 | -0.387 | 0.451  | -0.004 | 0.082  | -0.672             | 0.490       | 0.824          | 0.744          | 0.638   | 0.000       | 0.128  | 0.003   |
| $\tau$         | -0.138              | 0.027     | 0.034  | 0.110  | 0.127  | -0.115 | -0.189 | -0.207 | 0.155              | -0.655      | -0.039         | 0.030          | -0.017  | -0.352      | 0.000  | 0.021   |
| Shannon        | 0.045               | 0.154     | 0.283  | 0.010  | -0.135 | 0.328  | -0.160 | -0.114 | -0.286             | 0.646       | 0.367          | 0.292          | 0.088   | 0.624       | -0.512 | 0.000   |

## 8. Calibration and dating

|                  | Breeds                 | $\tau$ | $\tau$ qt 5% | $\tau$ qt 95% | Date | 5%   | 95%   |
|------------------|------------------------|--------|--------------|---------------|------|------|-------|
| Morocco          | Blanche de Monatgne    | 8.1    | 5.6          | 9.3           | 7665 | 6373 | 8303  |
|                  | Boujaad                | 7.5    | 4.9          | 15.3          | 7352 | 6015 | 11350 |
|                  | Beni-Guil              | 7.6    | 5.6          | 12.7          | 7408 | 6391 | 10035 |
|                  | D'man                  | 9.5    | 5.4          | 11.8          | 8398 | 6310 | 9539  |
|                  | Sardi                  | 7.1    | 5.5          | 11.9          | 7170 | 6330 | 9612  |
|                  | Timahdite              | 6.3    | 3.6          | 13.9          | 6726 | 5365 | 10641 |
| Iberia           | Campaniça              | 8.5    | 6.0          | 10.9          | 7877 | 6618 | 9088  |
|                  | Churra Algarvia        | 9.3    | 6.3          | 10.8          | 8293 | 6770 | 9020  |
|                  | Churra Badana          | 9.0    | 6.4          | 10.4          | 8116 | 6810 | 8838  |
|                  | Churra de Terra Quente | 8.8    | 5.9          | 10.9          | 8035 | 6526 | 9076  |
|                  | Latxa blonde face      | 6.1    | 4.6          | 7.2           | 6625 | 5859 | 7214  |
|                  | Latxa Black Face       | 6.9    | 4.5          | 8.9           | 7060 | 5815 | 8102  |
|                  | Saloia                 | 8.2    | 6.7          | 9.2           | 7713 | 6950 | 8243  |
|                  | Spanish Merino         | 8.2    | 6.6          | 9.5           | 7738 | 6885 | 8390  |
| Italy            | Appenninica            | 8.8    | 5.7          | 10.1          | 8040 | 6456 | 8701  |
|                  | Gentile de Puglia      | 8.6    | 7.1          | 9.6           | 7915 | 7134 | 8415  |
|                  | Merinizzata Italiana   | 8.8    | 6.2          | 9.8           | 8029 | 6721 | 8554  |
|                  | Lacaune of Italy       | 7.6    | 6.2          | 8.6           | 7414 | 6720 | 7928  |
|                  | Sopravissana           | 9.2    | 7.3          | 10.7          | 8219 | 7242 | 9011  |
|                  | Sarda                  | 8.4    | 5.0          | 10.7          | 7823 | 6100 | 9011  |
| Moroccan group 1 |                        | 7.0    | 5.3          | 11.4          | 7131 | 6224 | 9351  |
| Moroccan group 2 |                        | 9.9    | 6.8          | 11.6          | 8605 | 7024 | 9453  |
| Iberian group    |                        | 7.8    | 7.1          | 8.1           | 7503 | 7134 | 7688  |
| Italian group    |                        | 8.8    | 8.0          | 9.2           | 8002 | 7638 | 8229  |

## Supplementary Data 2: Phylogenetic tree

### Evolutionary analysis by Maximum Likelihood method

The evolutionary history was inferred by using the Maximum Likelihood method and Hasegawa-Kishino-Yano mode<sup>40</sup>. The tree with the highest log likelihood (-23,775.91) is shown. Initial tree(s) for the heuristic search were obtained automatically by applying Neighbor- Join and BioNJ algorithms to a matrix of pairwise distances estimated using the Maximum Composite Likelihood (MCL) approach, and then selecting the topology with superior log likelihood value. A discrete Gamma distribution was used to model evolutionary rate differences among sites (5 categories (+G, parameter = 0.4180)). The rate variation model allowed for some sites to be evolutionarily invariable ([+I], 21.18% sites). The tree is drawn to scale, with branch lengths measured in the number of substitutions per site. This analysis involved 845 nucleotide sequences. There was a total of 628 positions in the final dataset. Evolutionary analyses were conducted in MEGA X<sup>32</sup>.

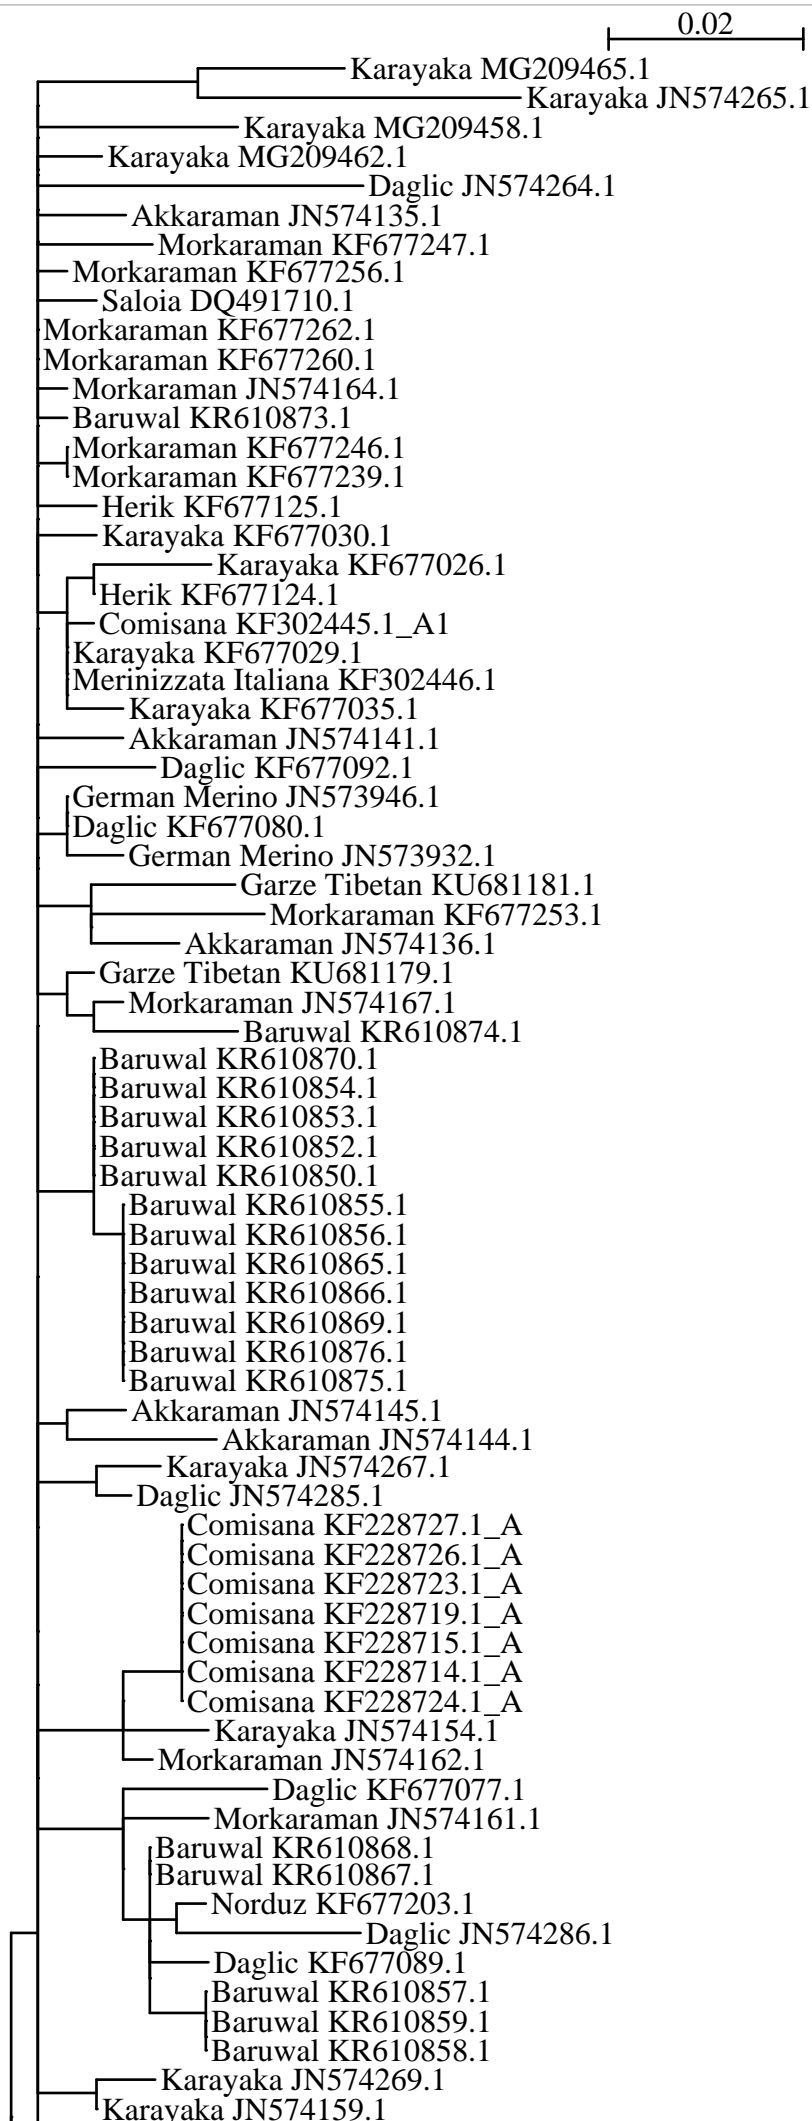



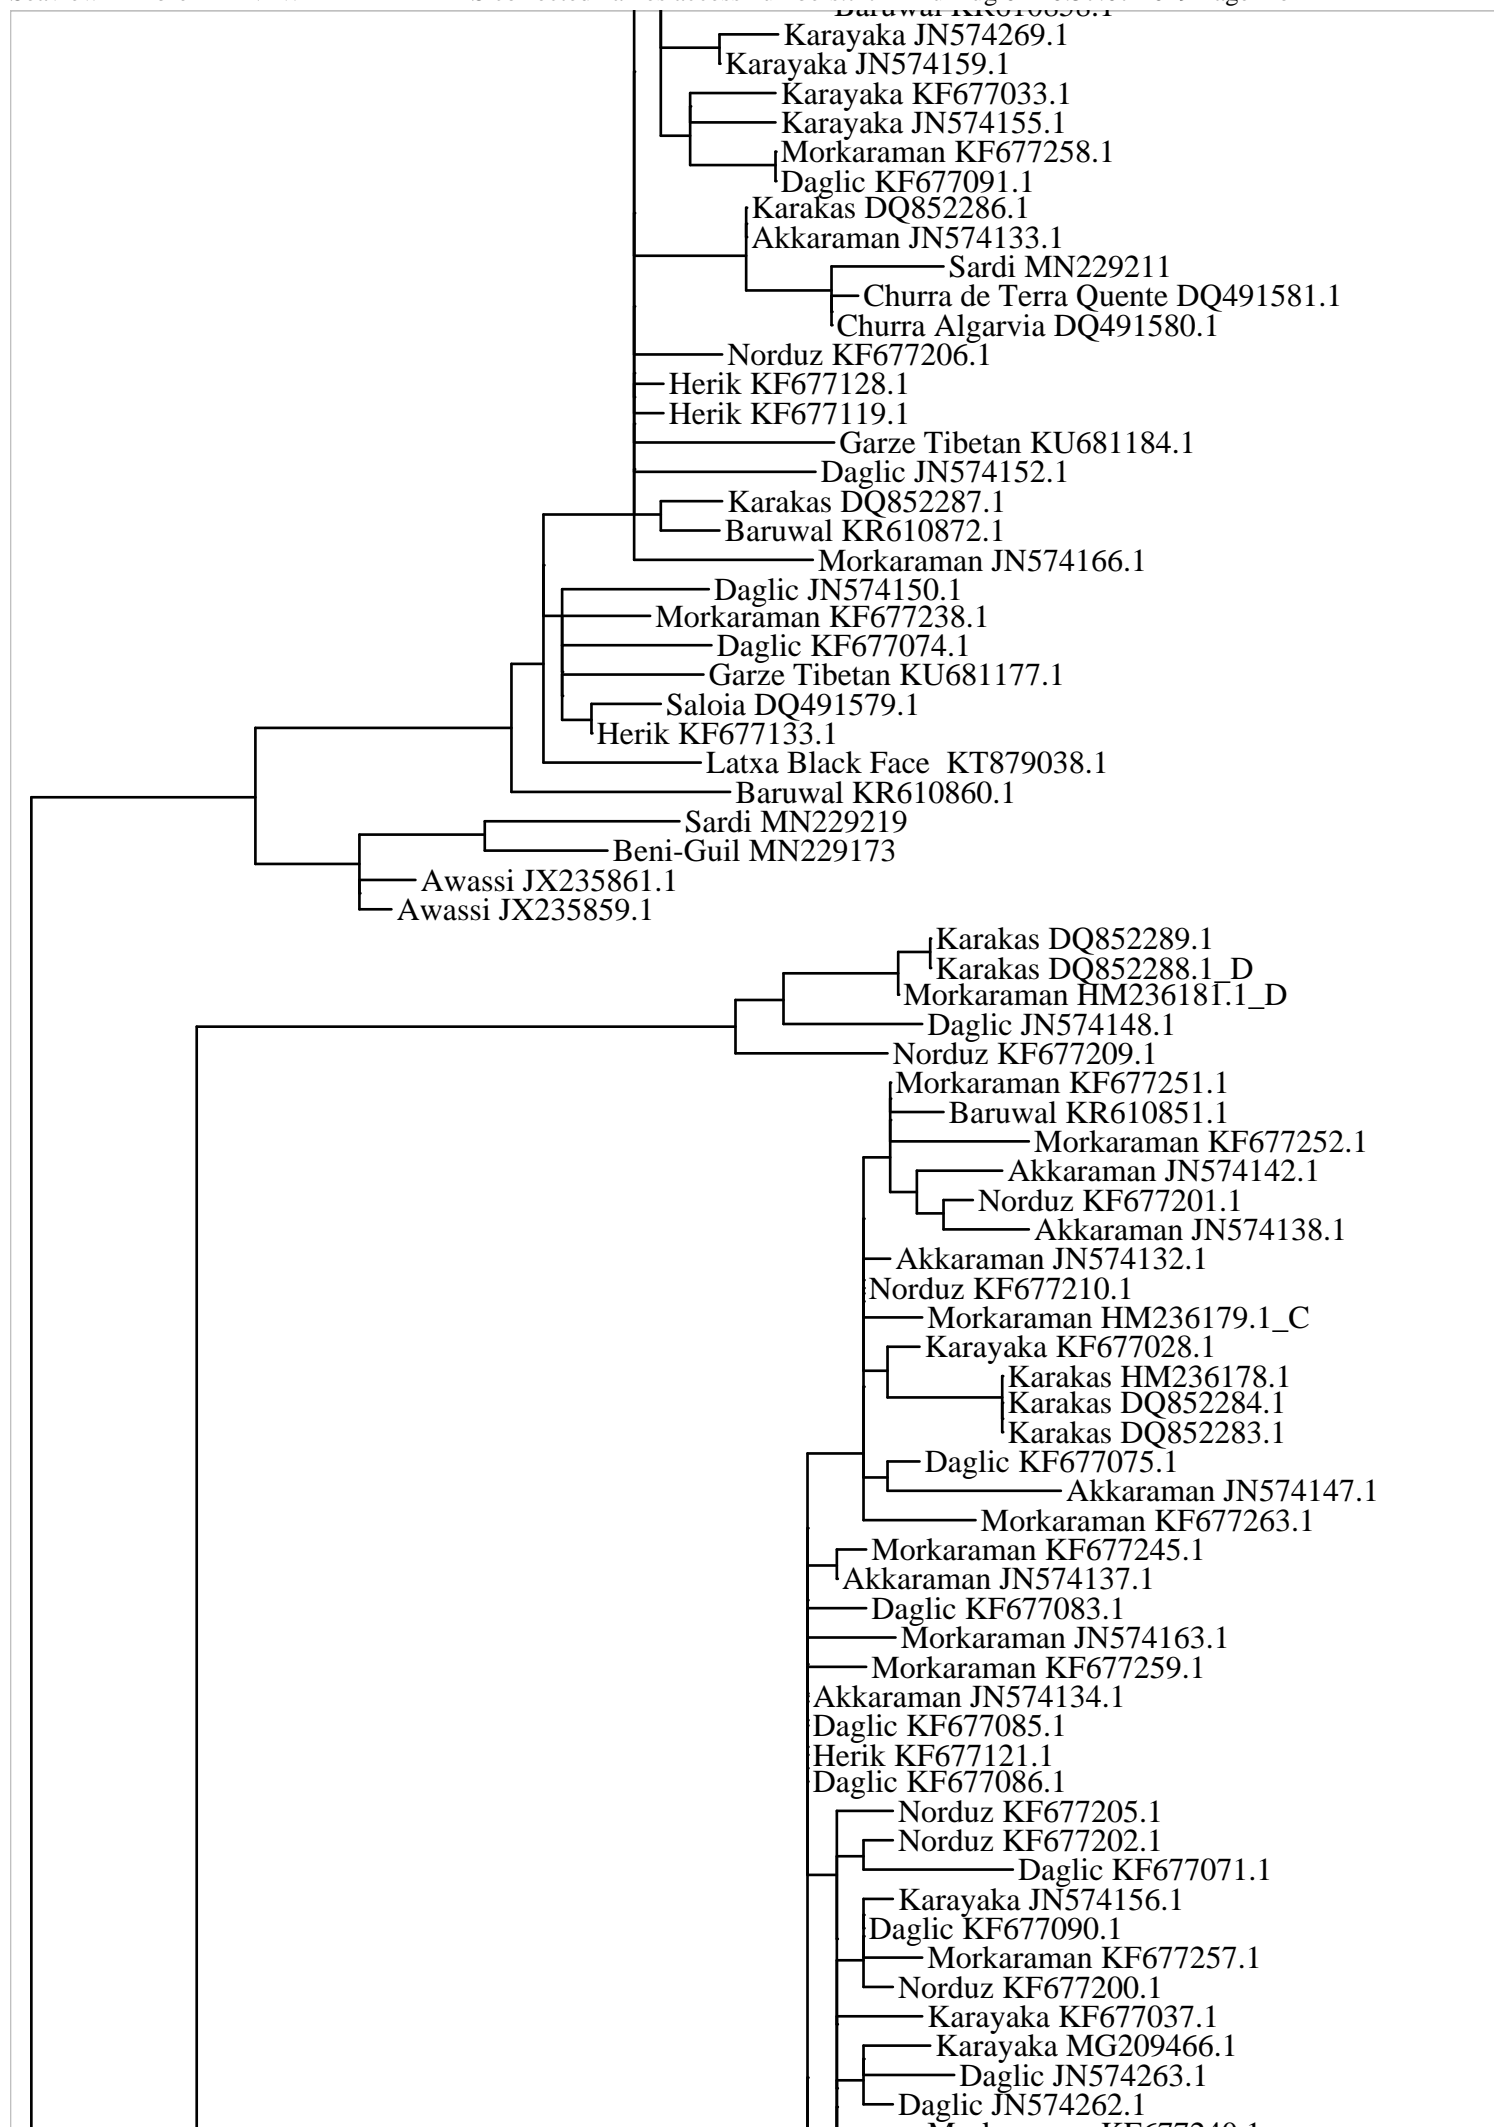

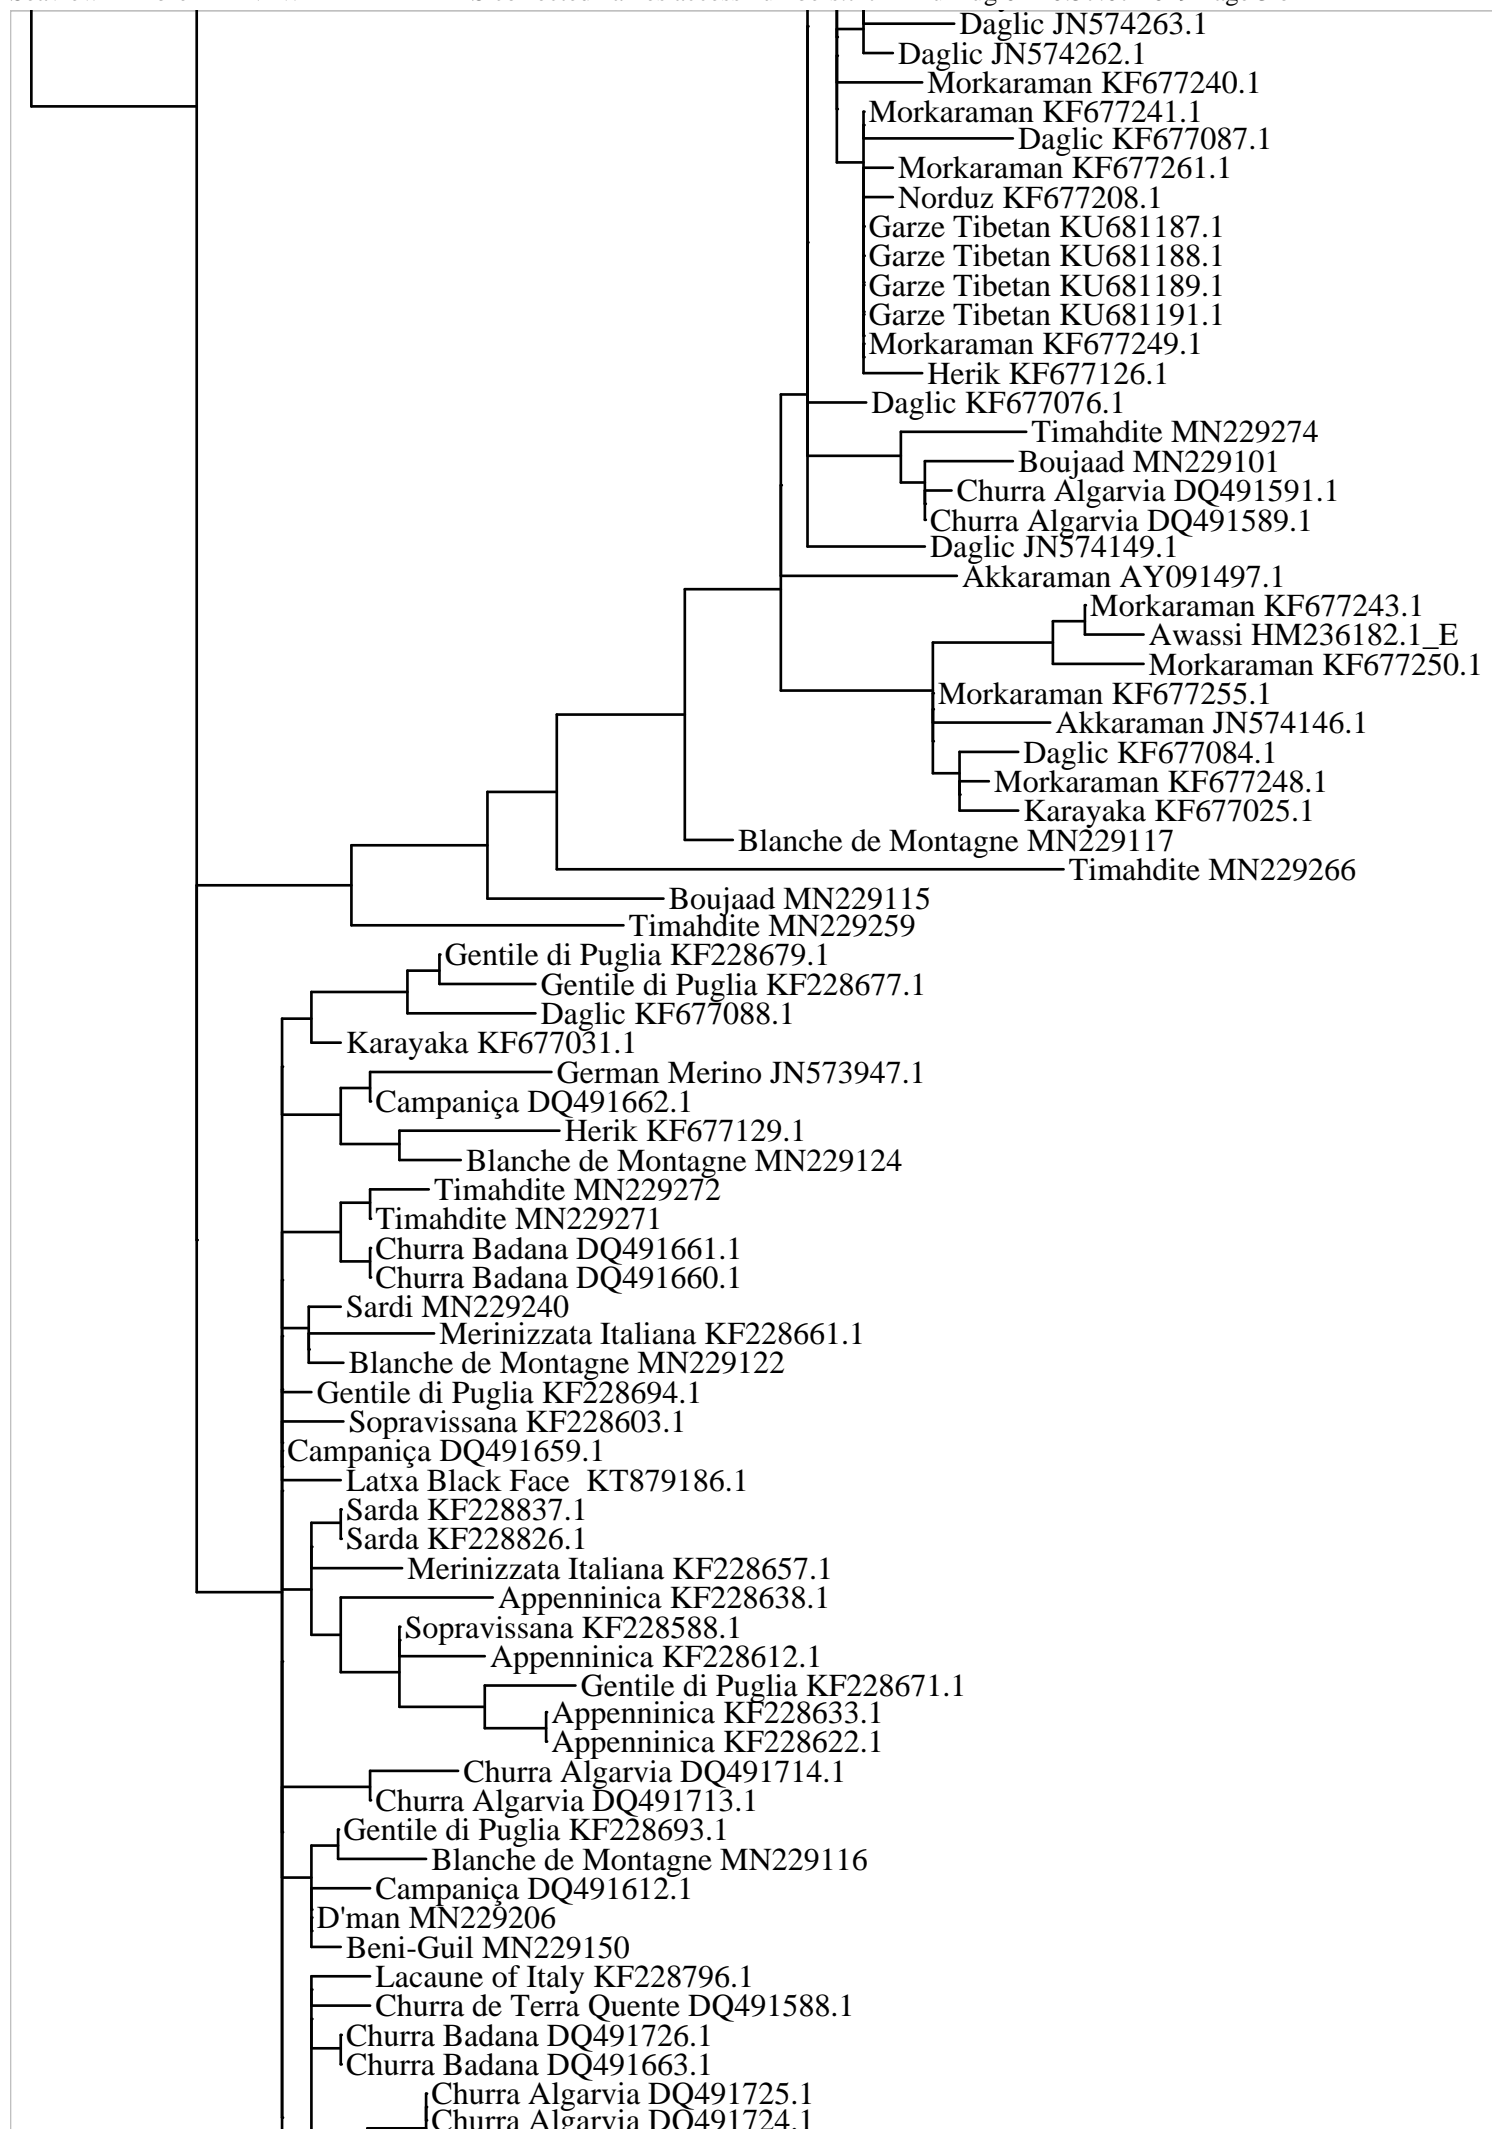

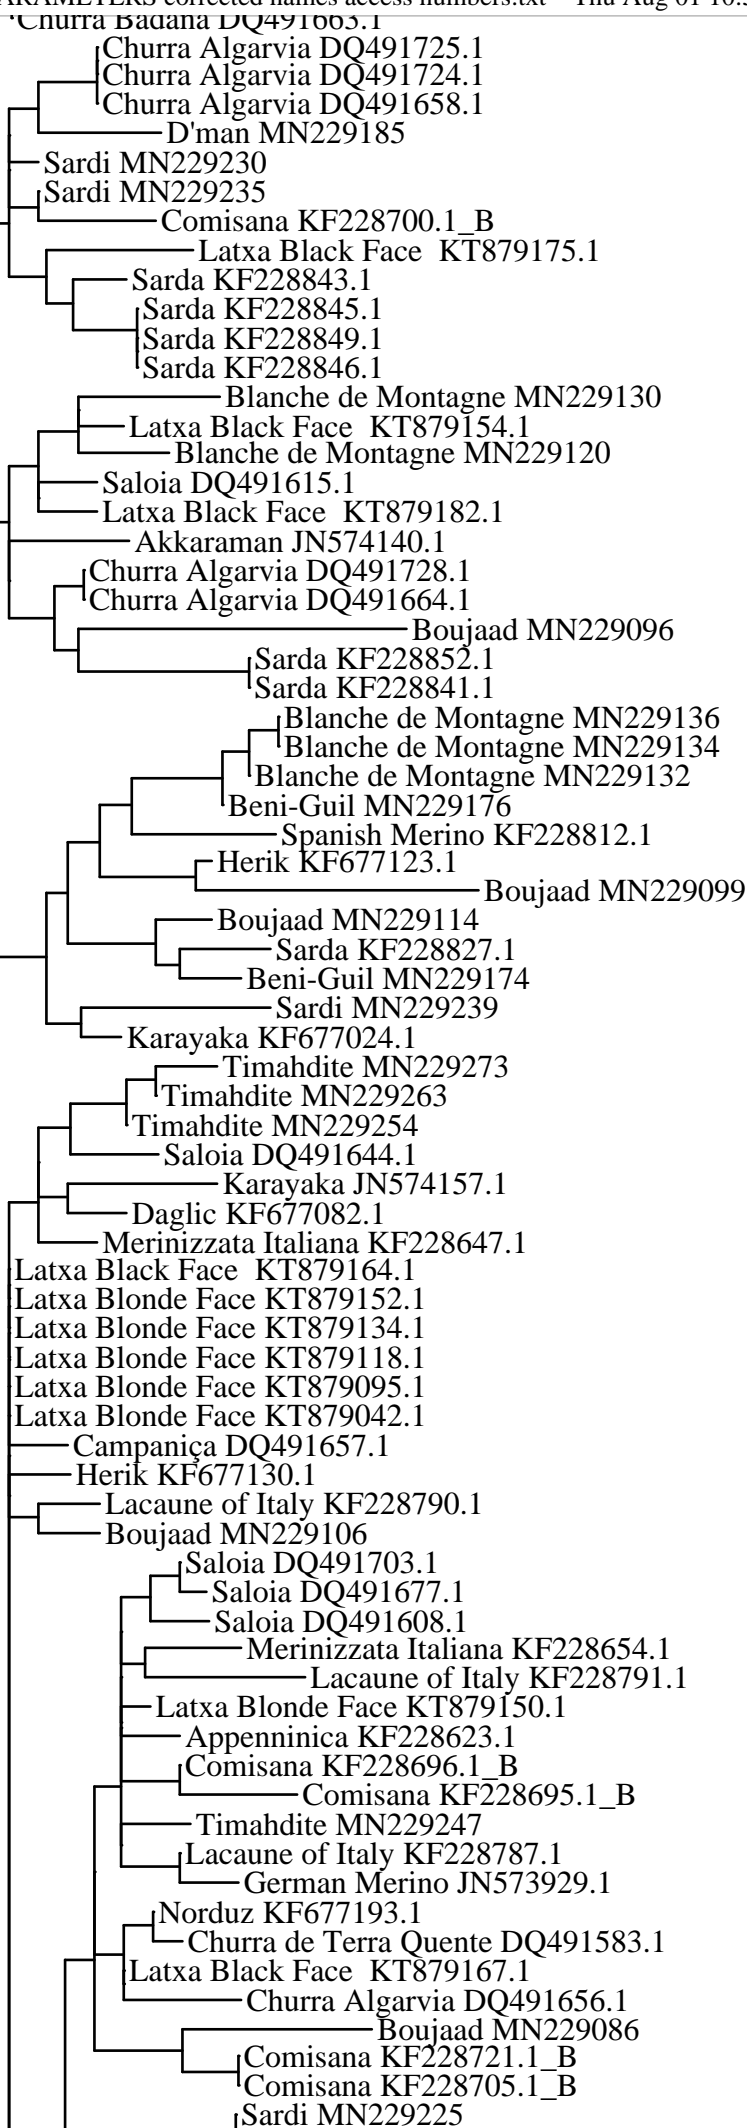

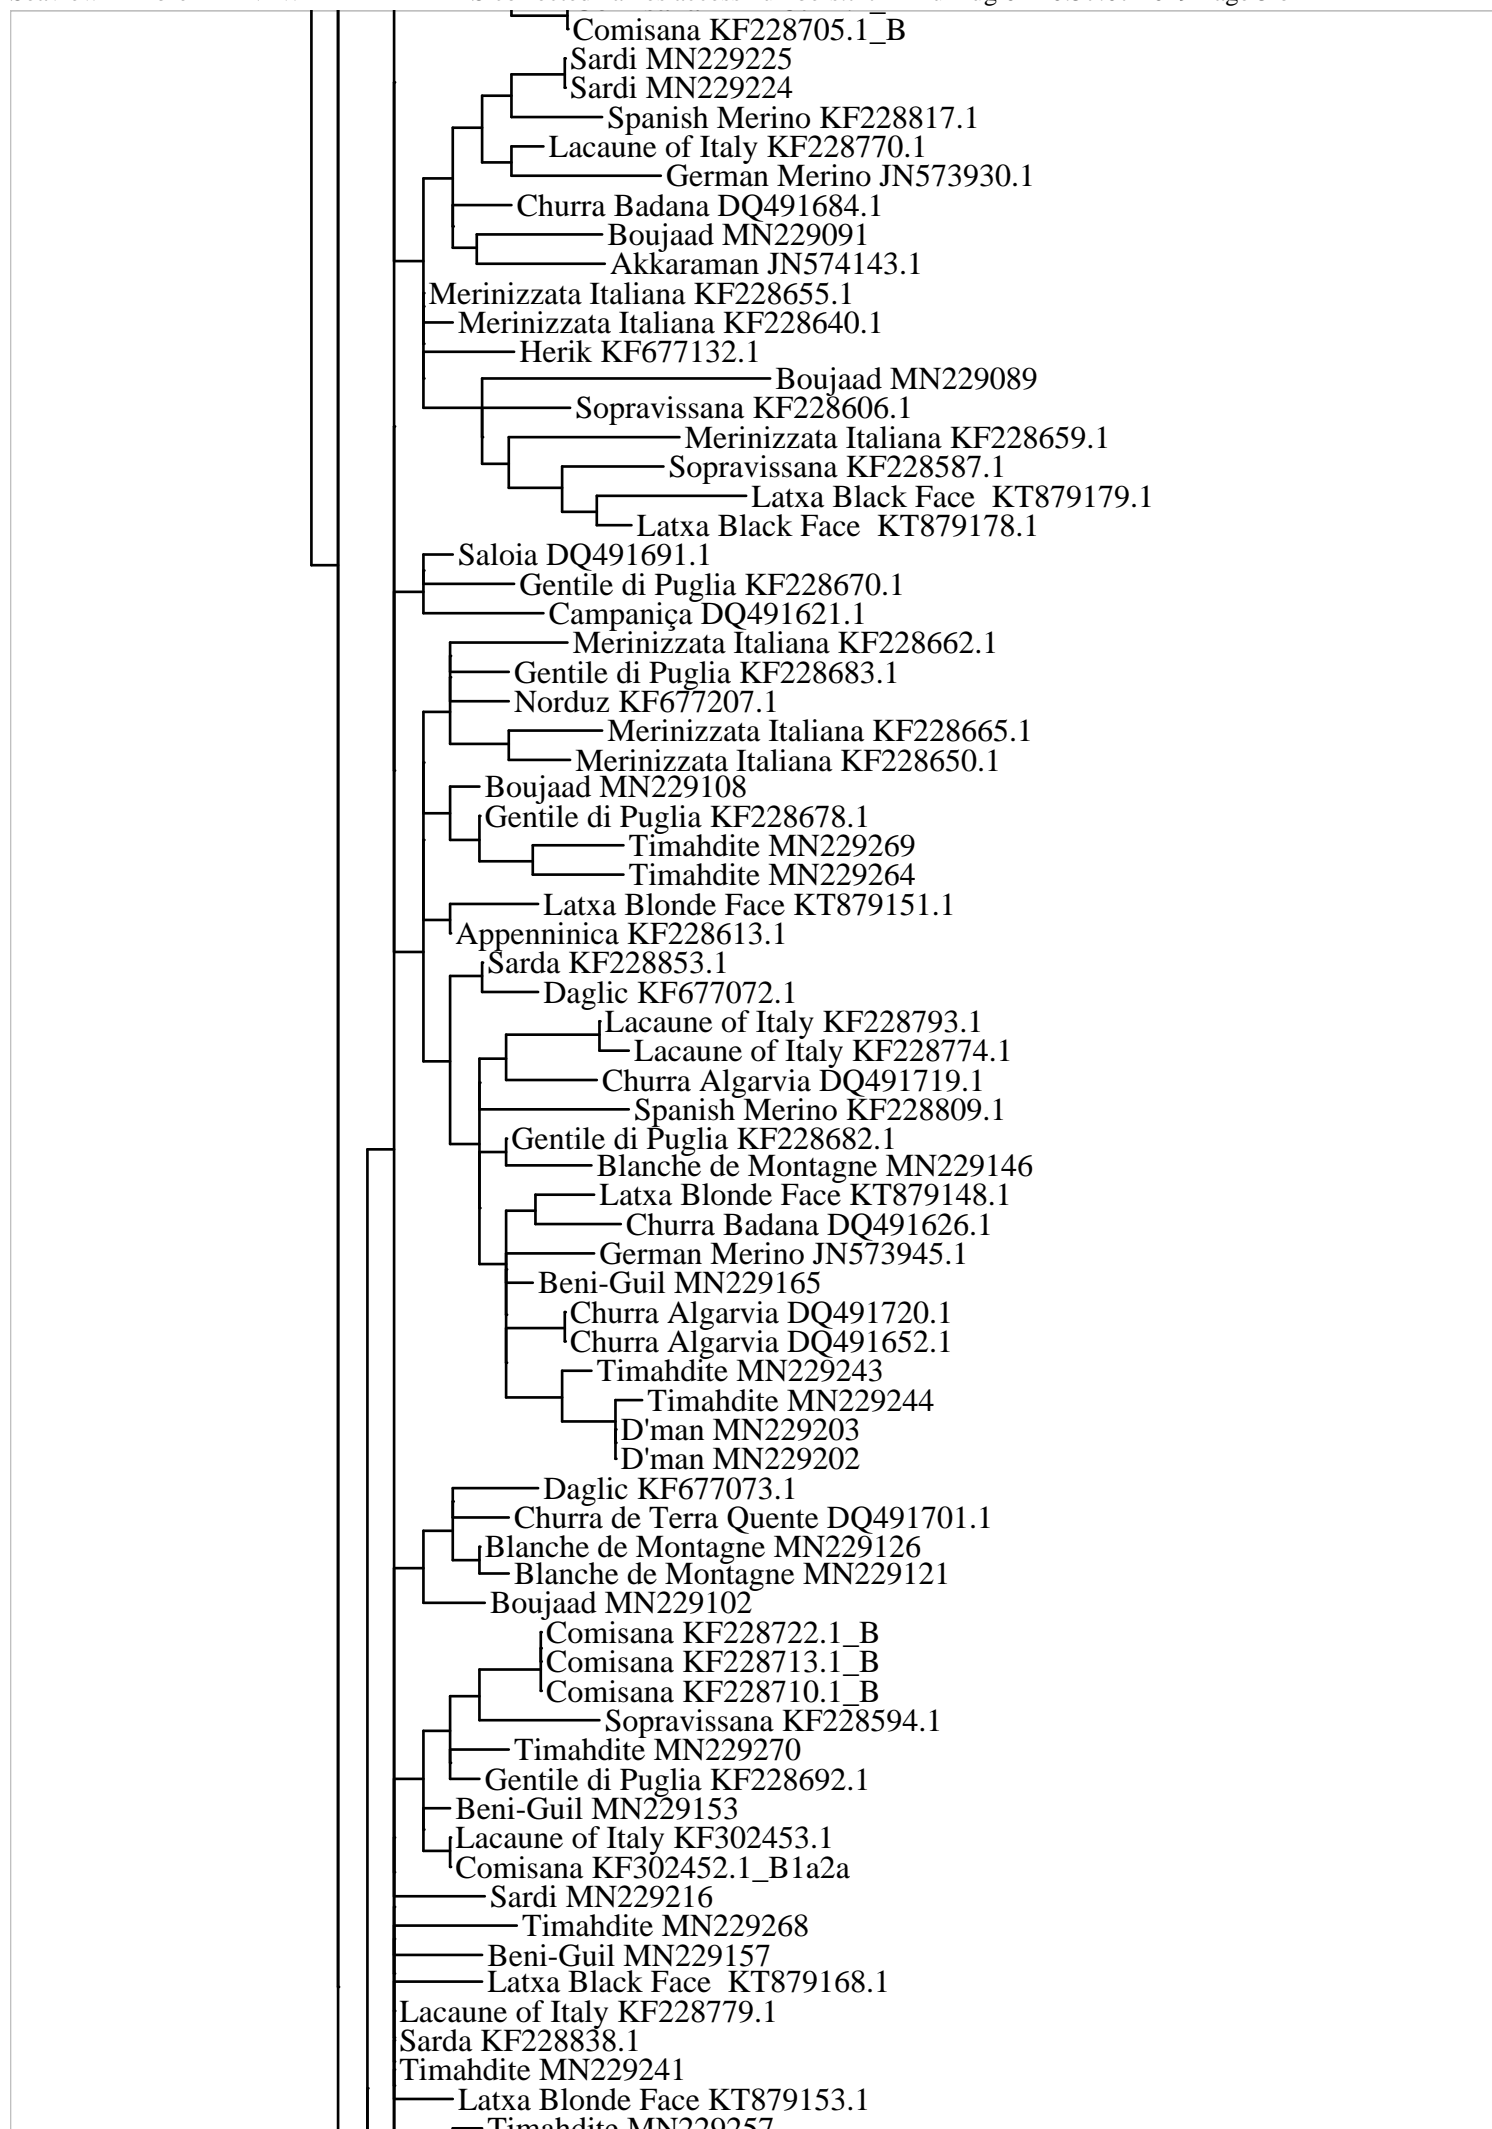

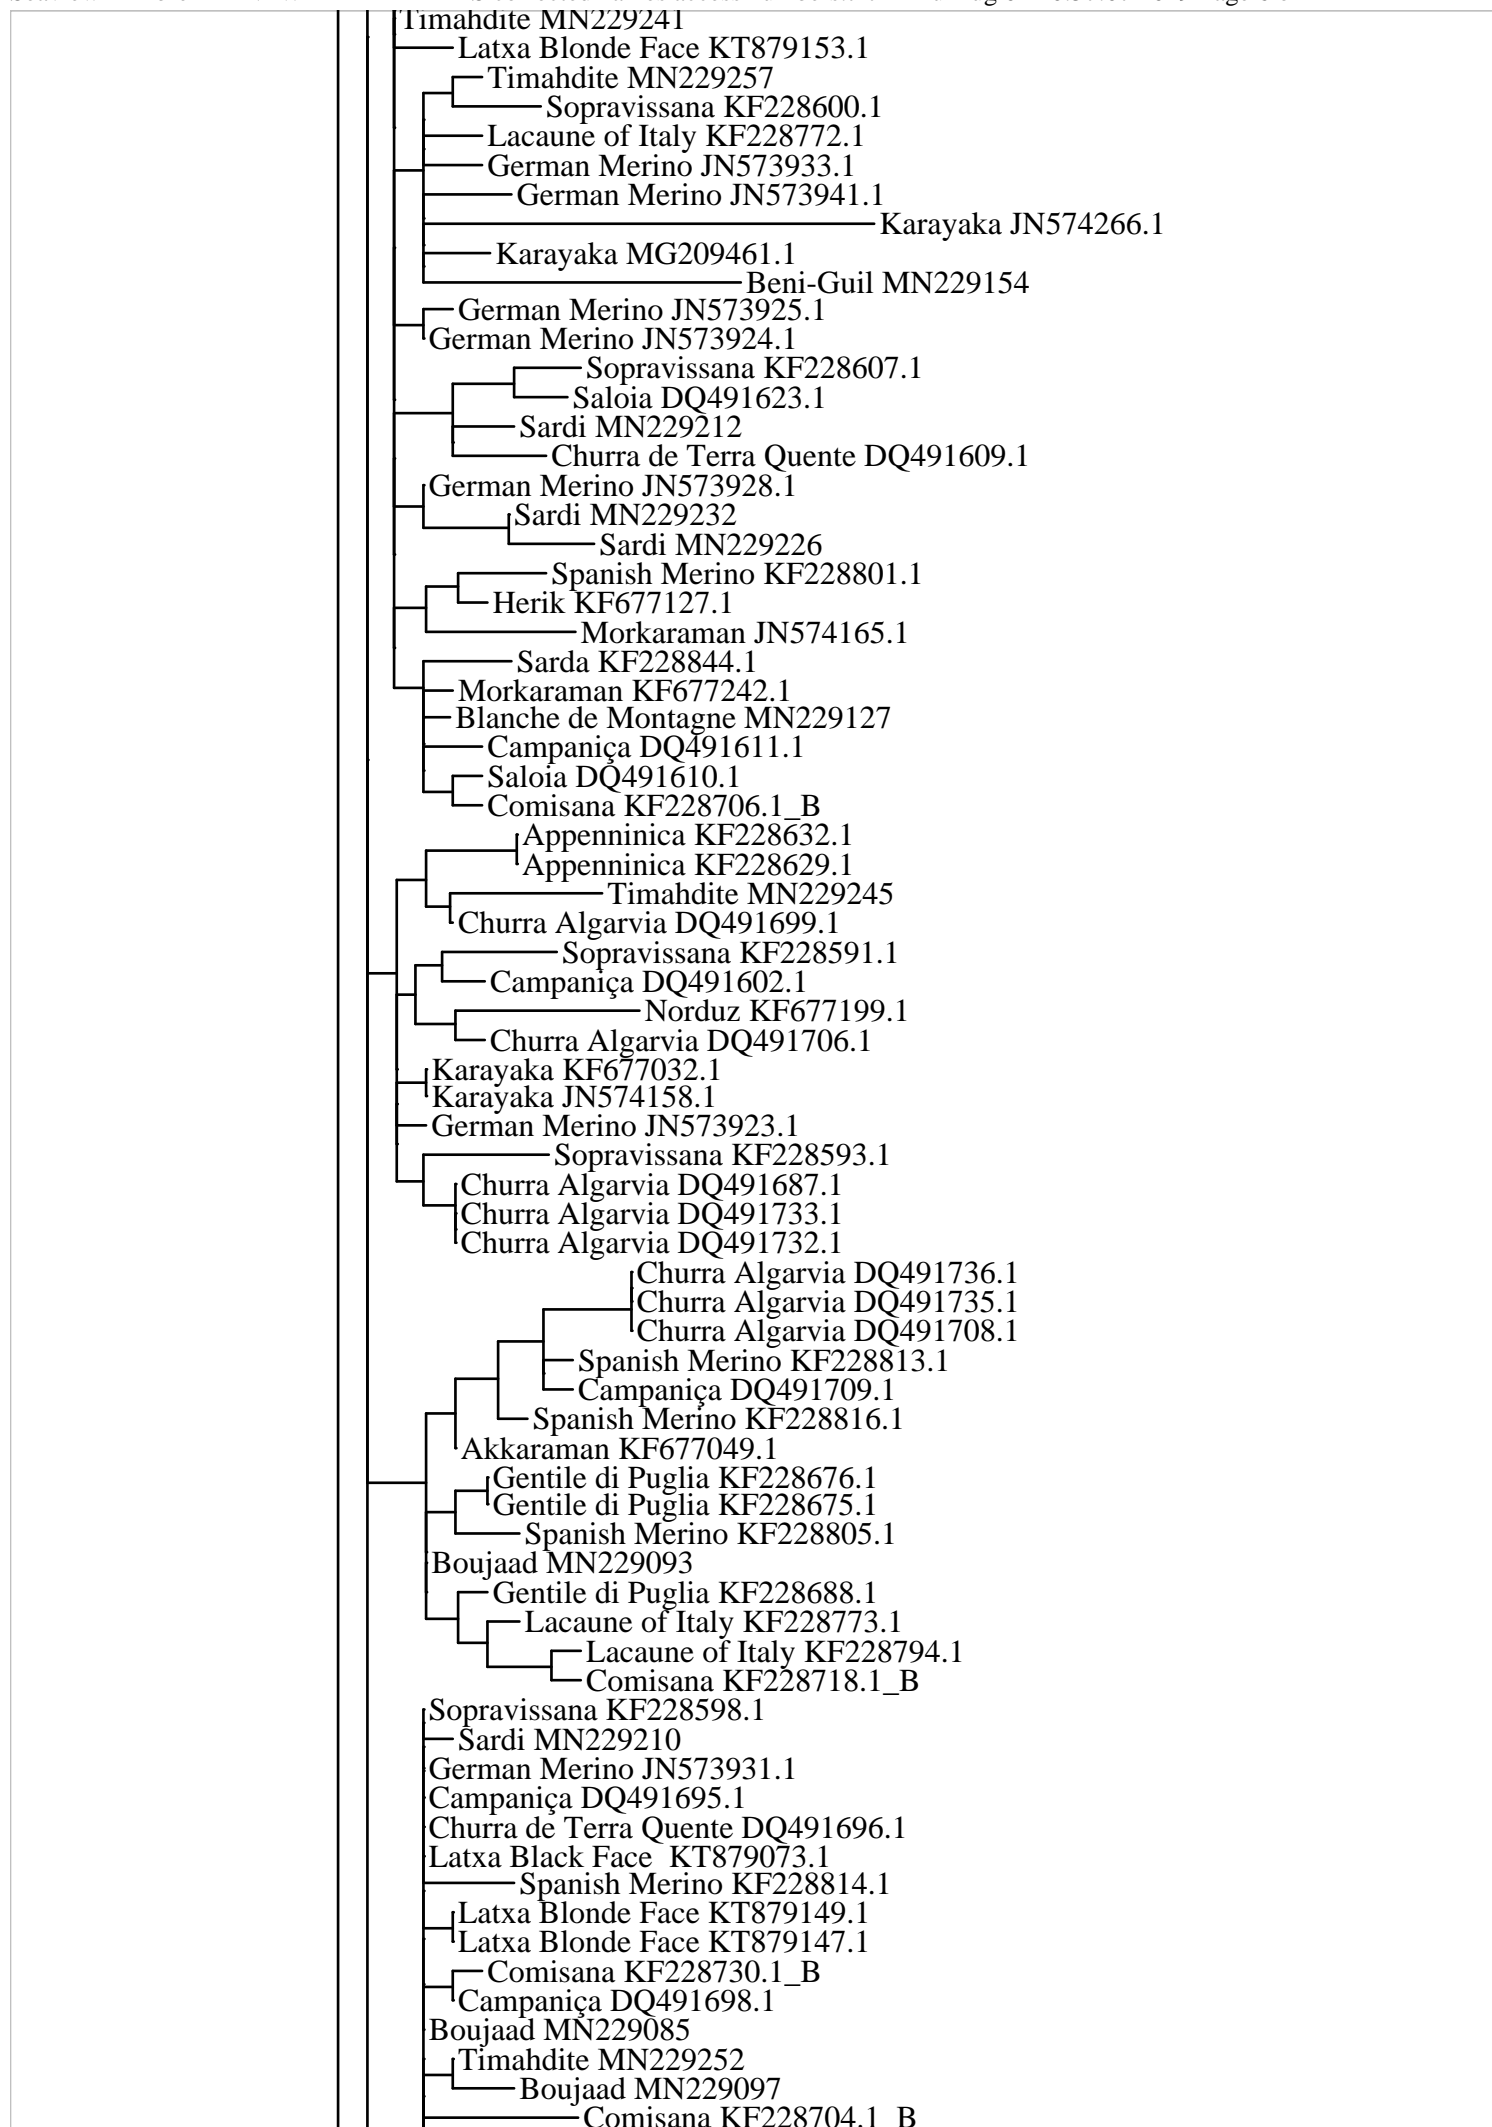

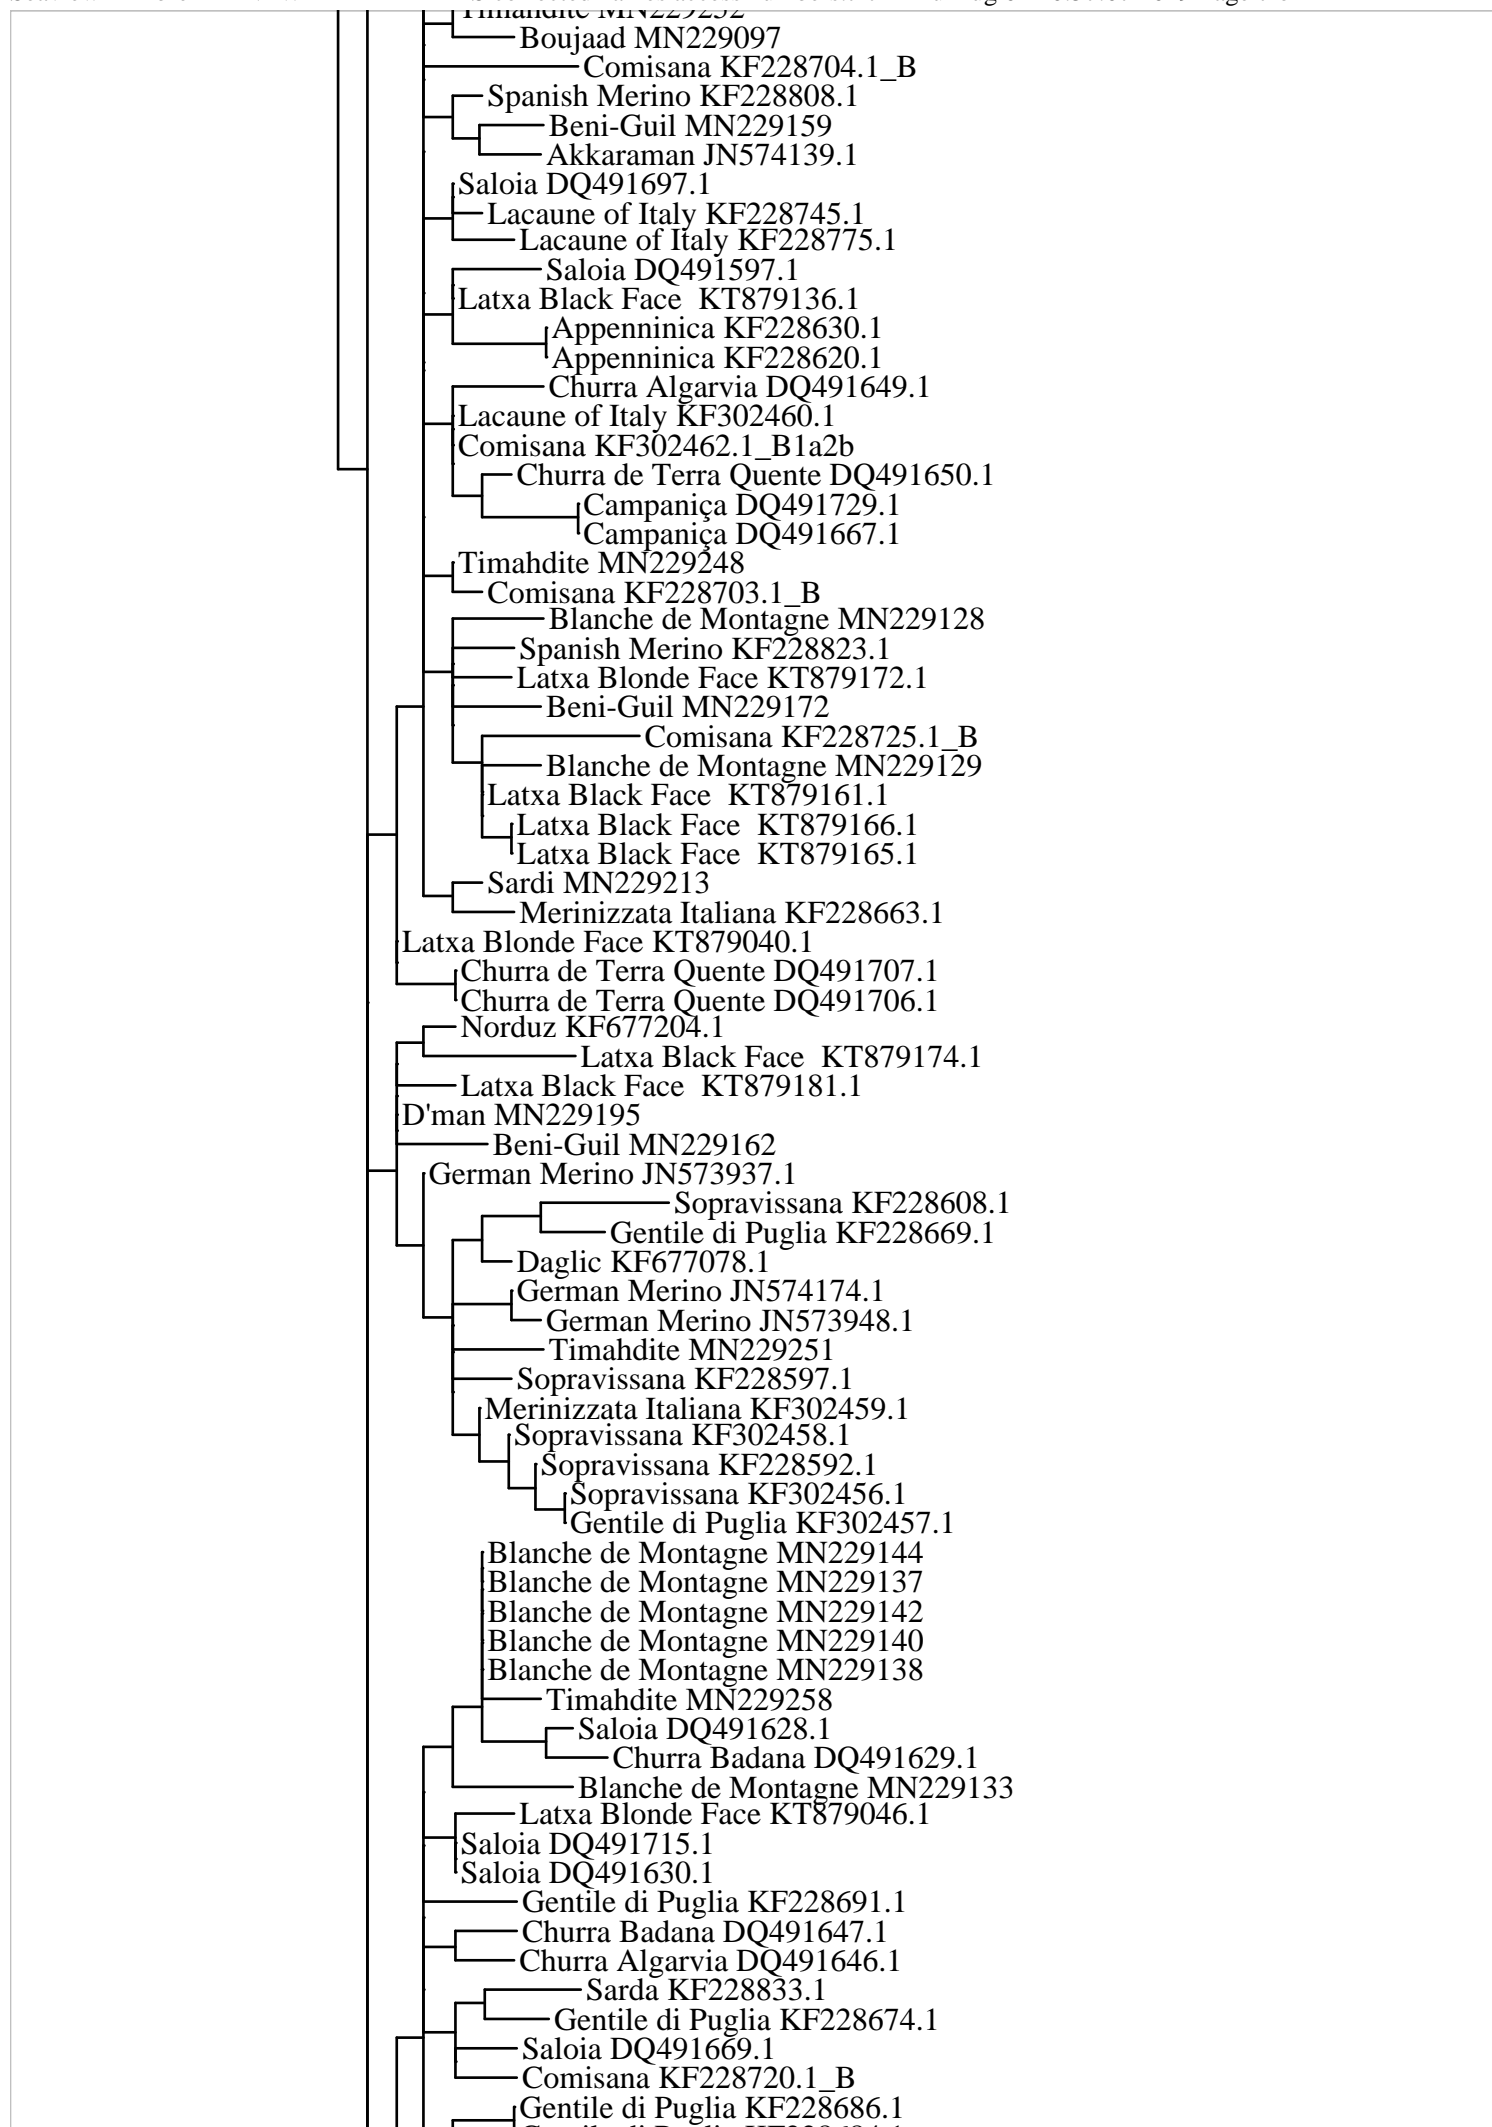

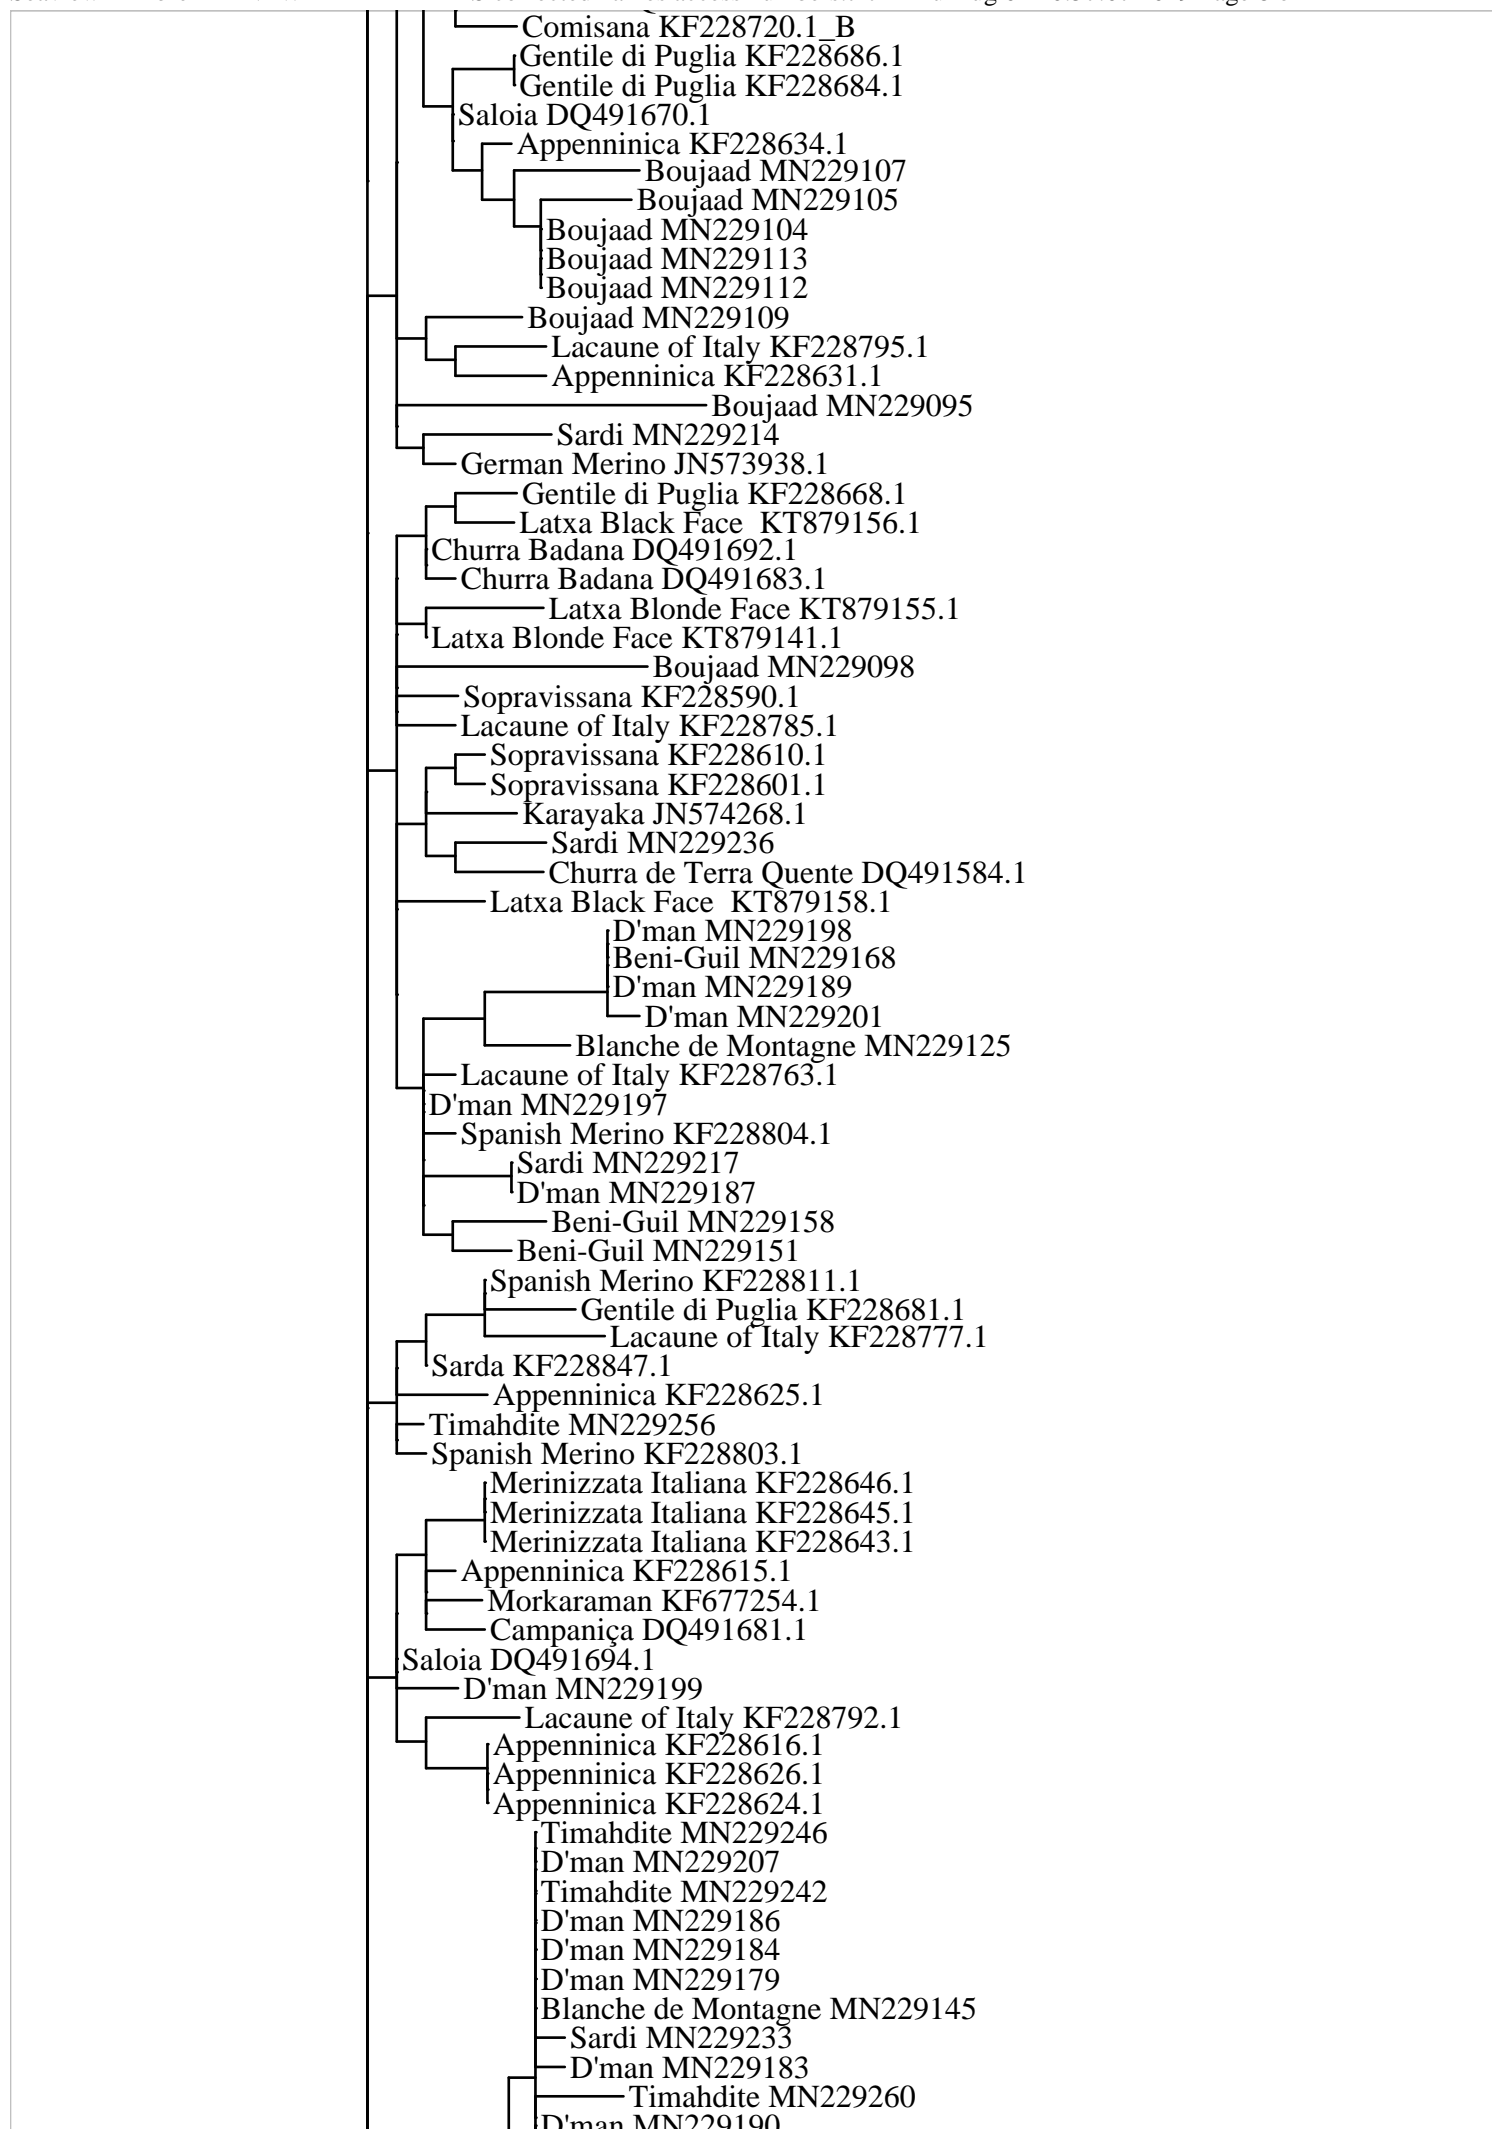

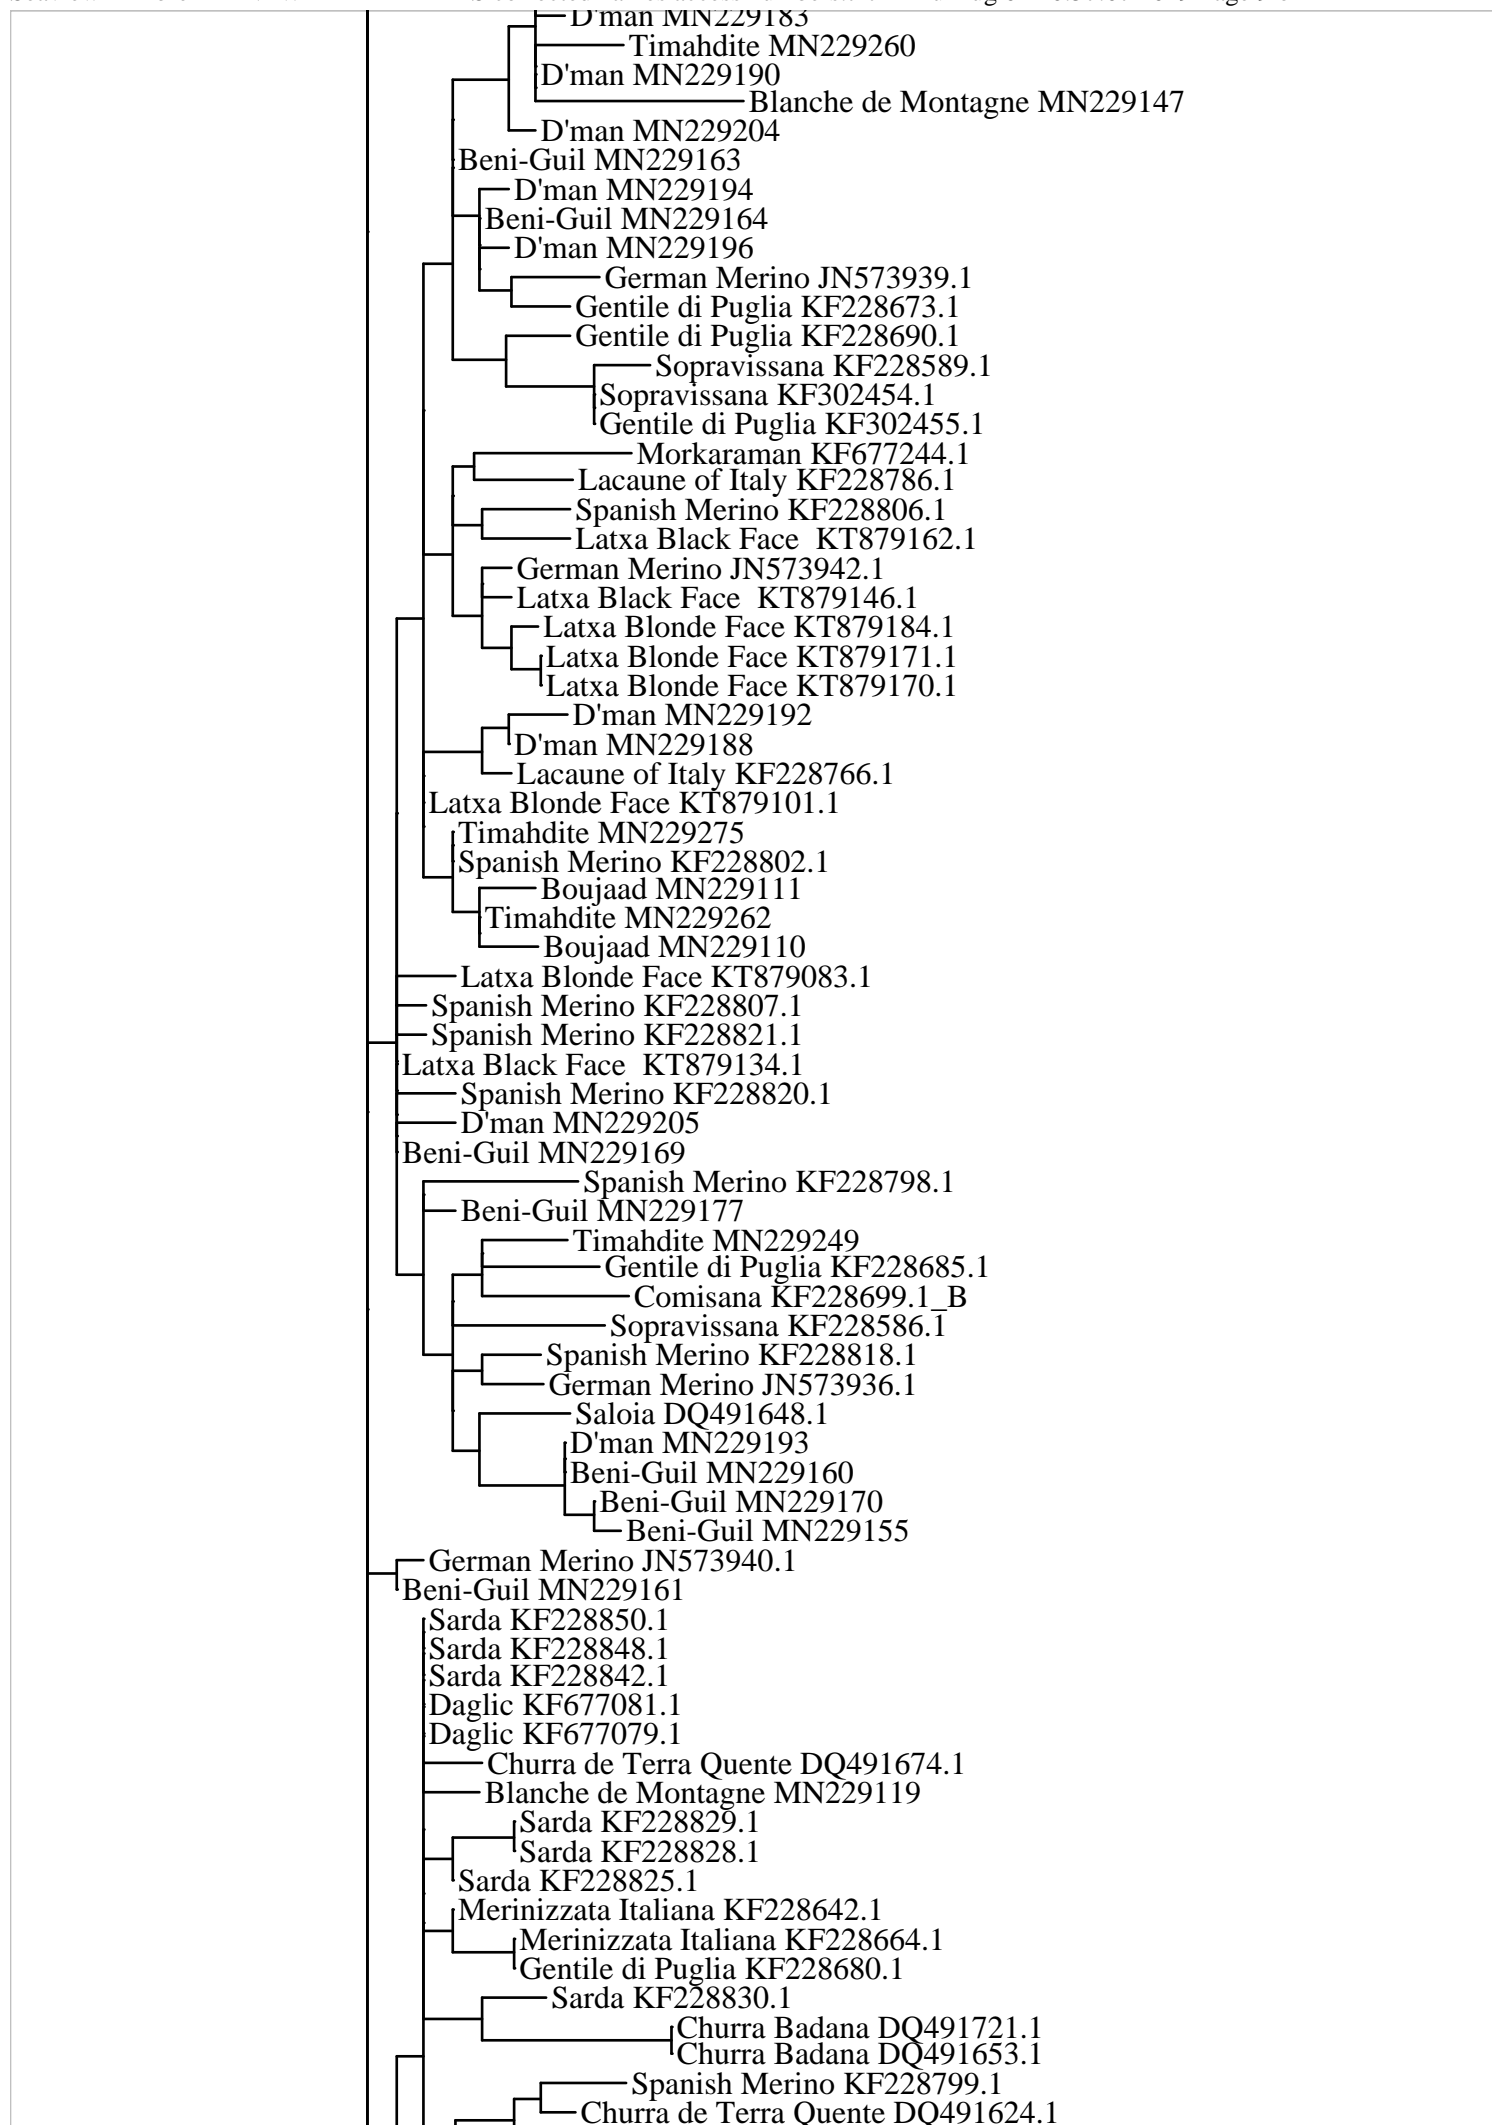



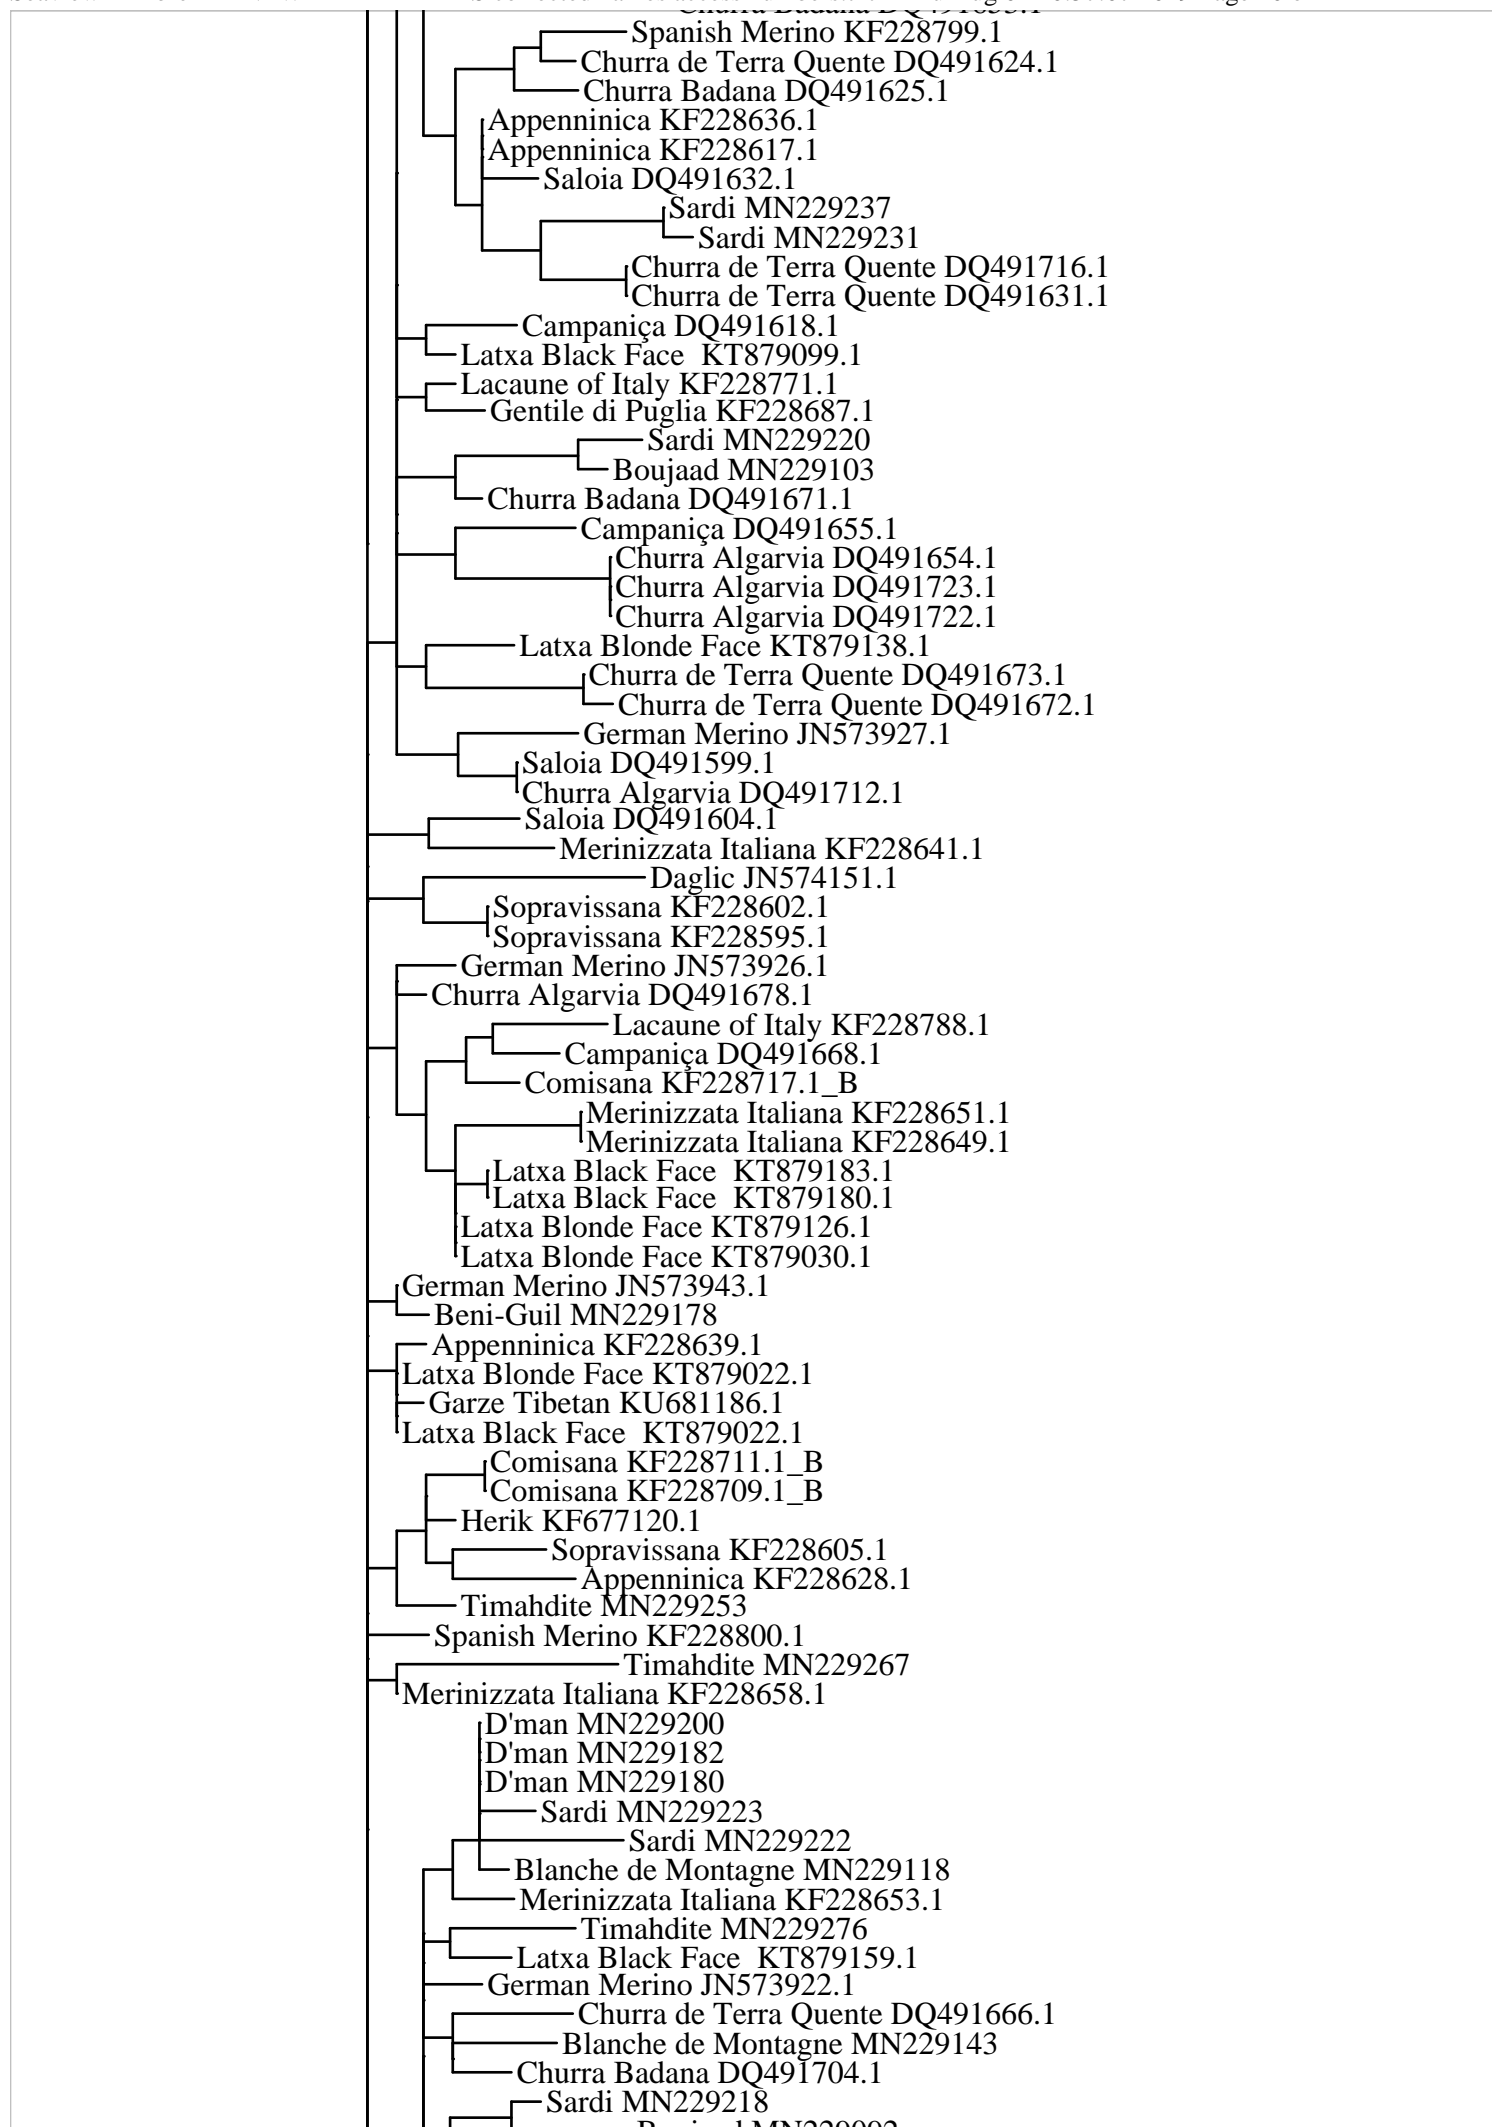

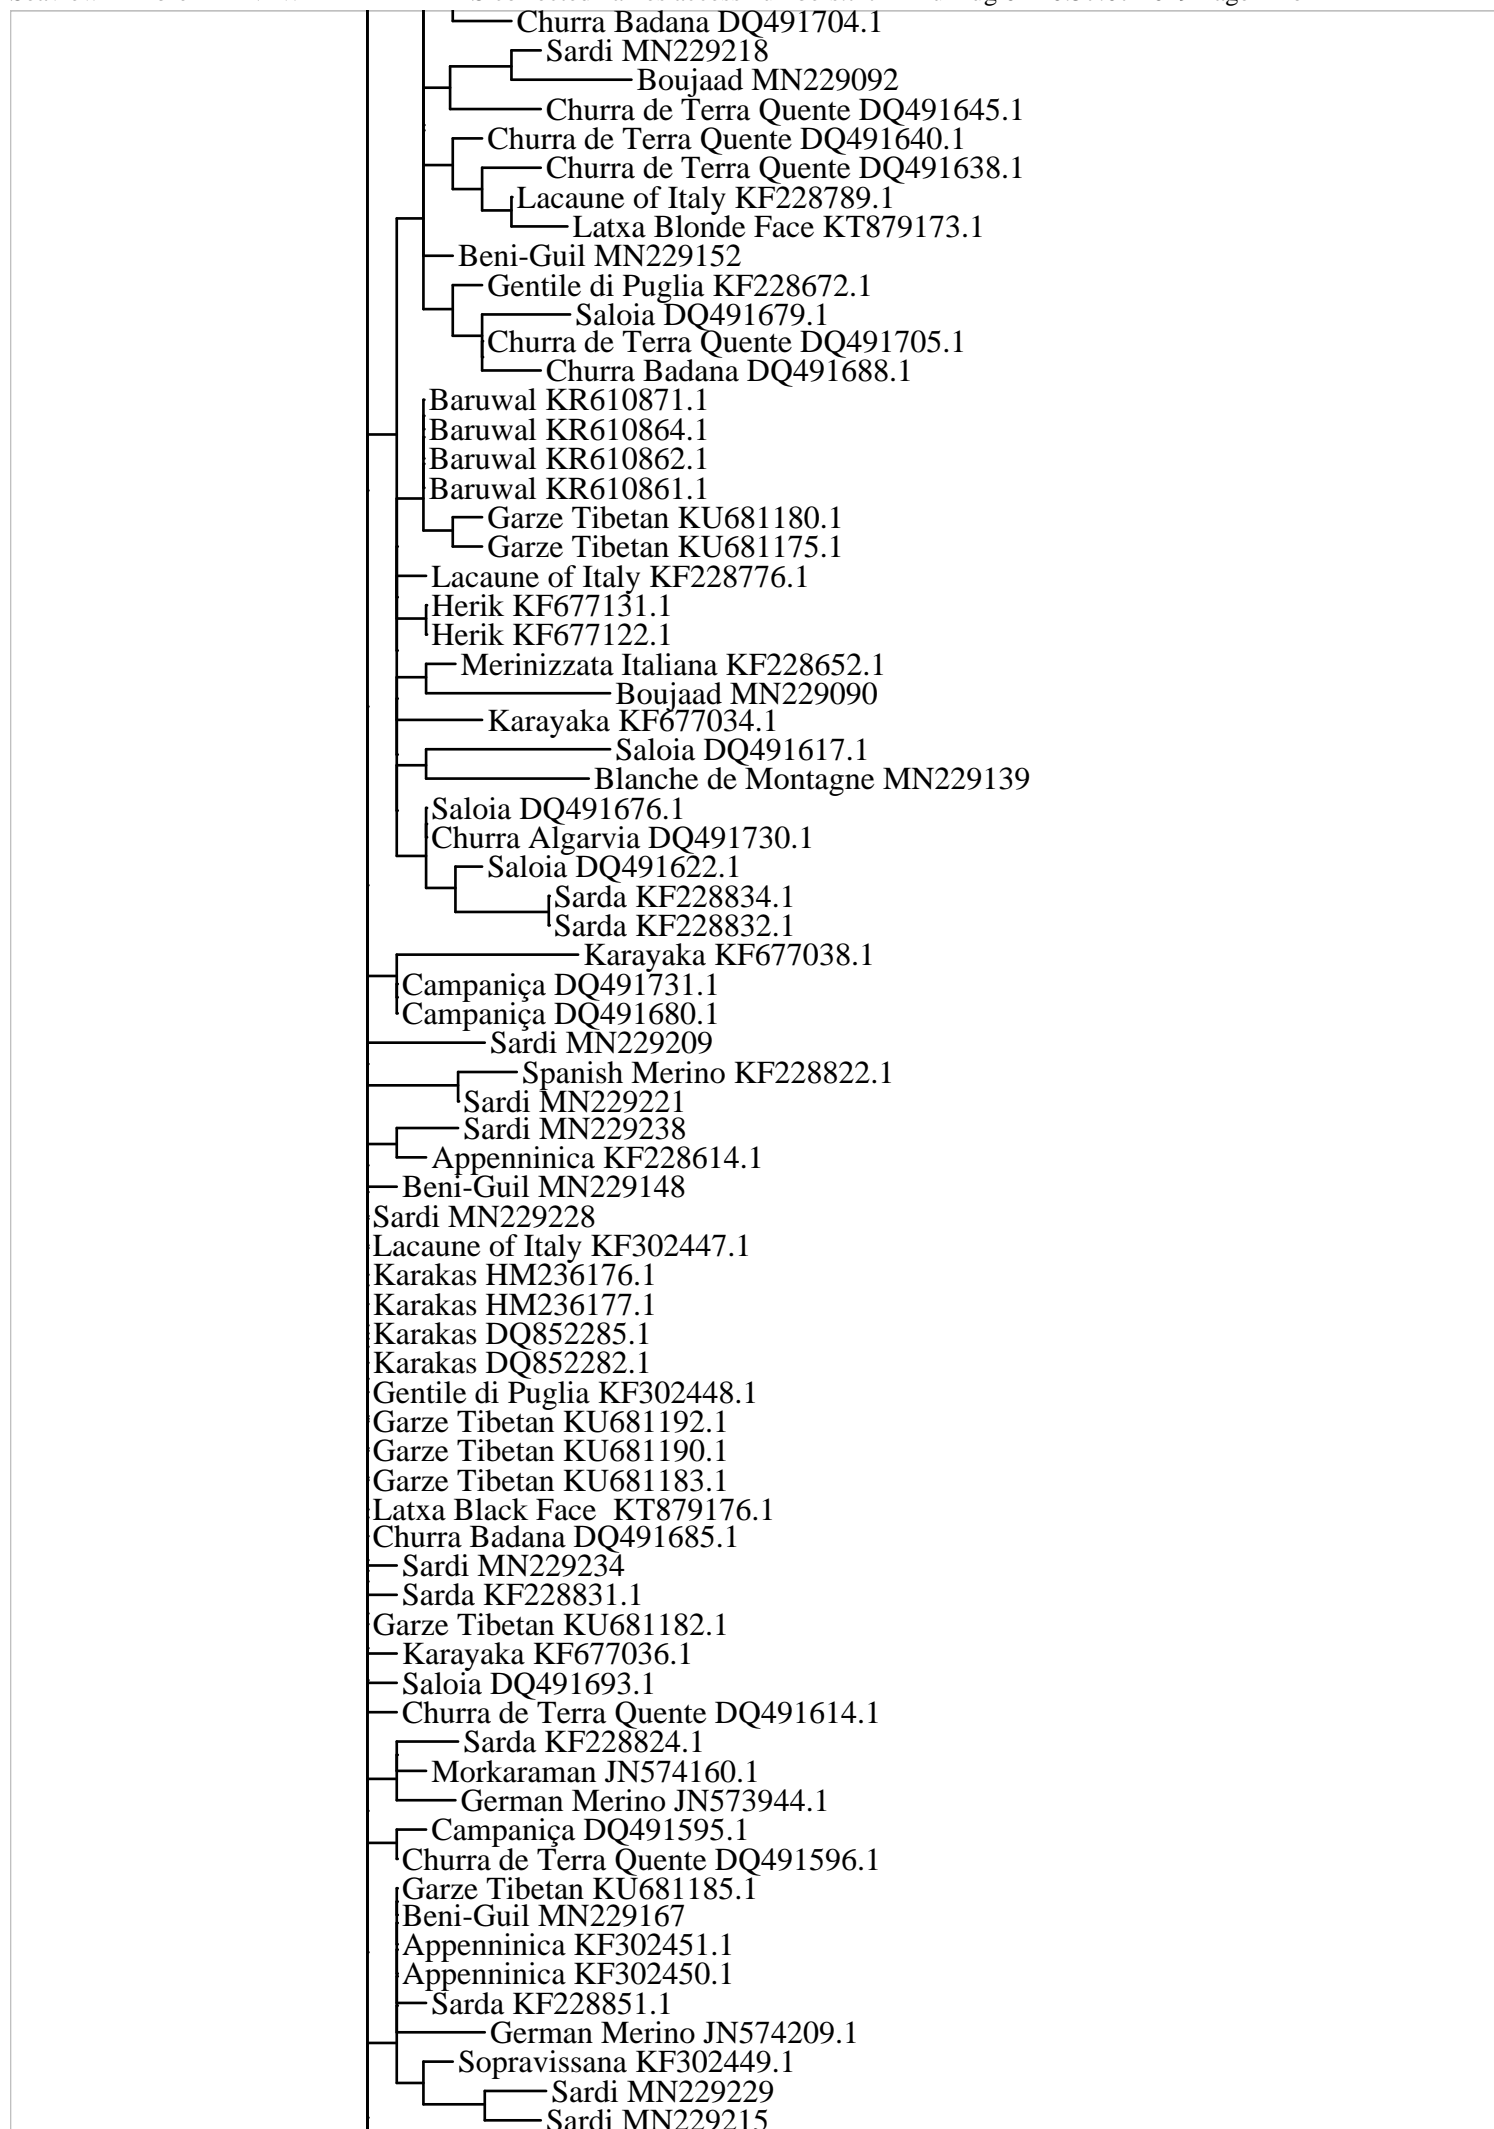

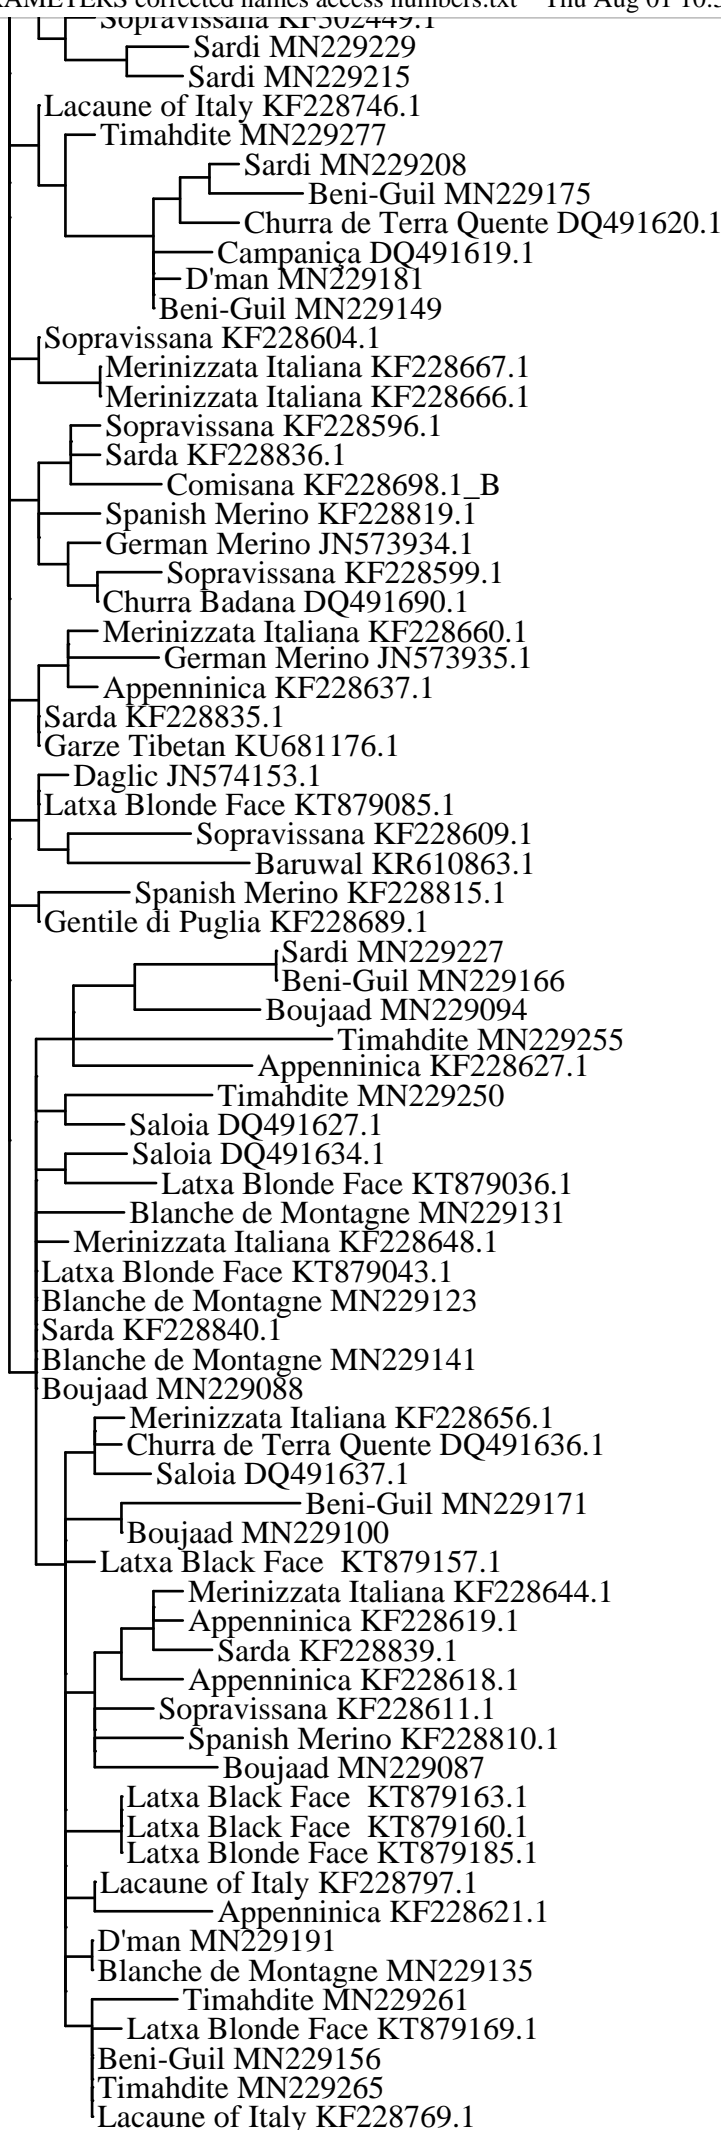

## Supplementary Data S3: Supplementary figures

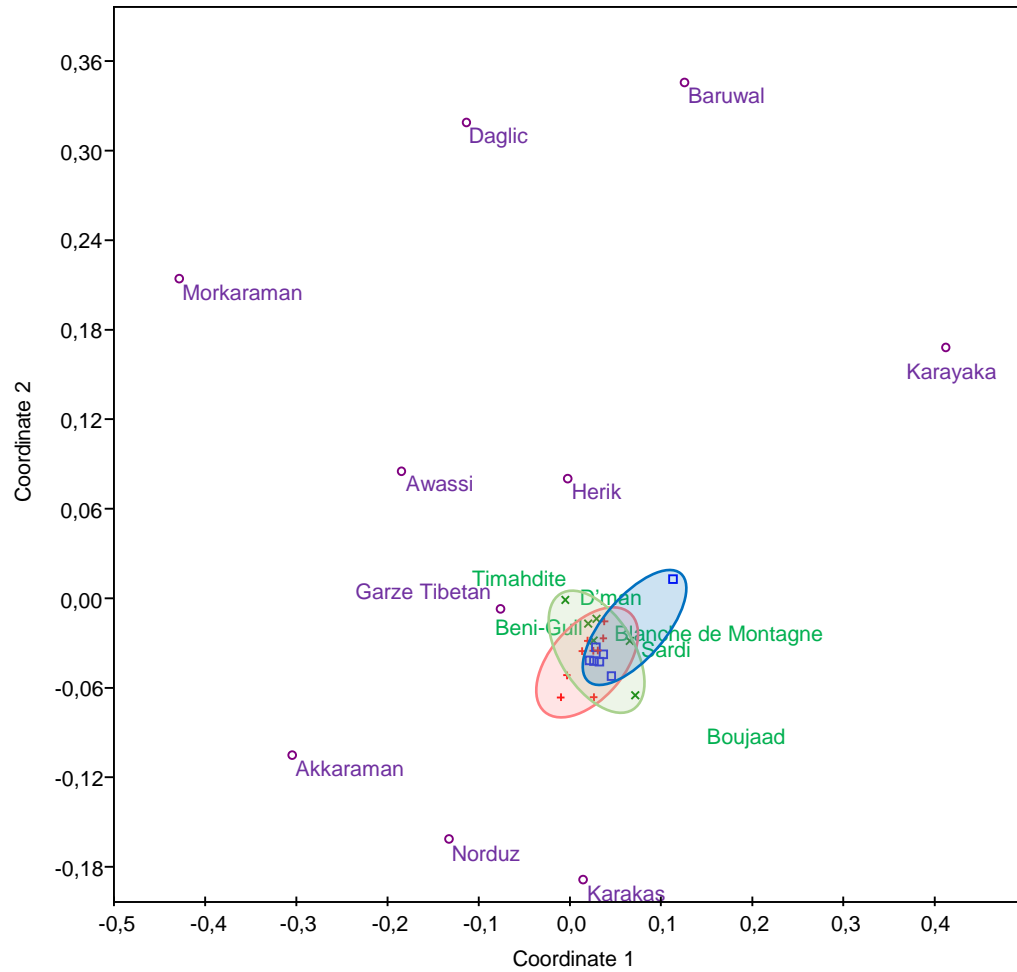

**A: N-MDS of Dxy genetic distance**

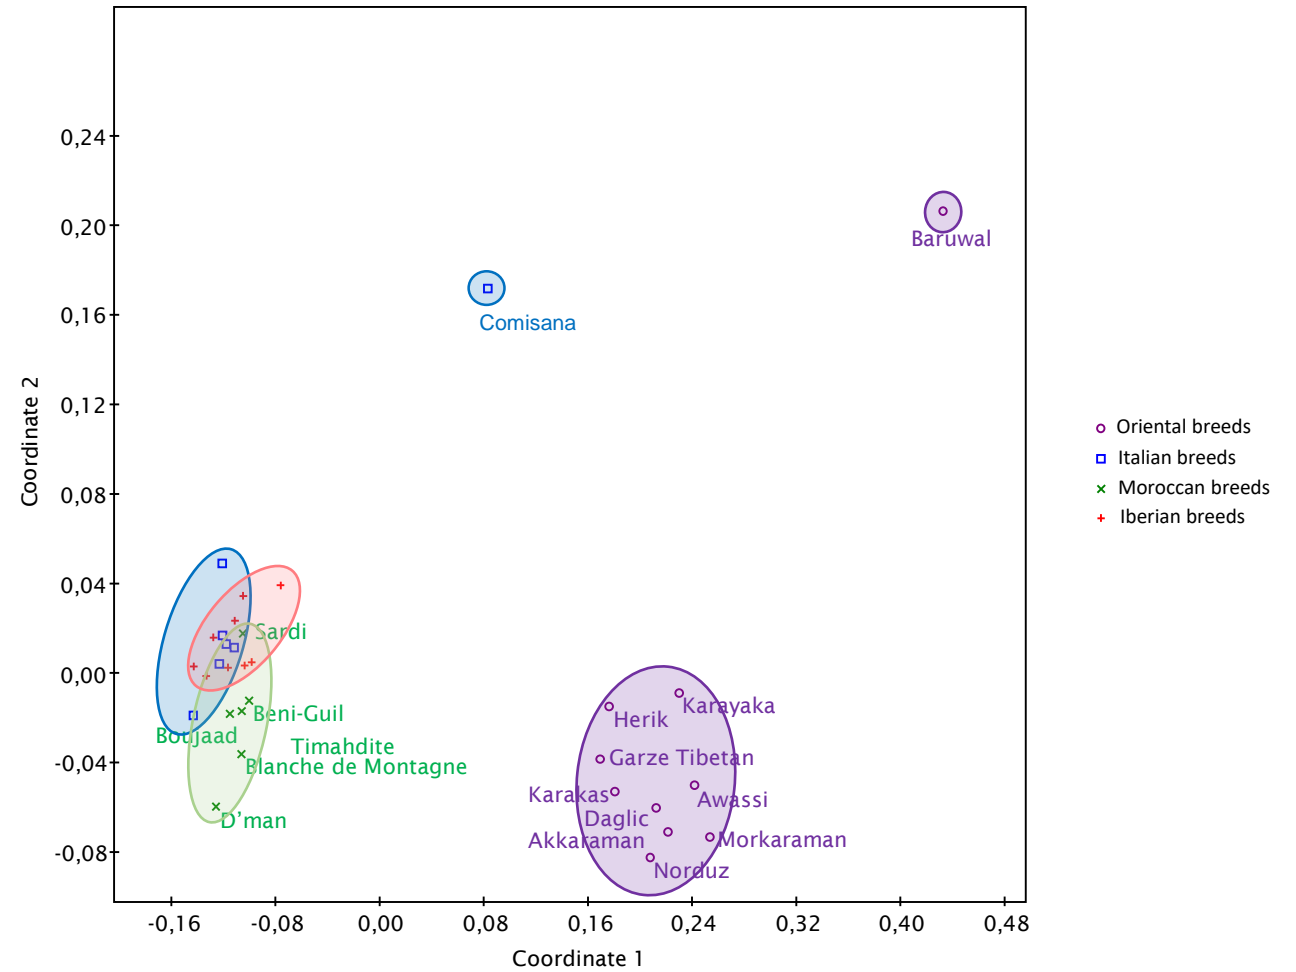

**B: N-MDS of Da genetic distance**

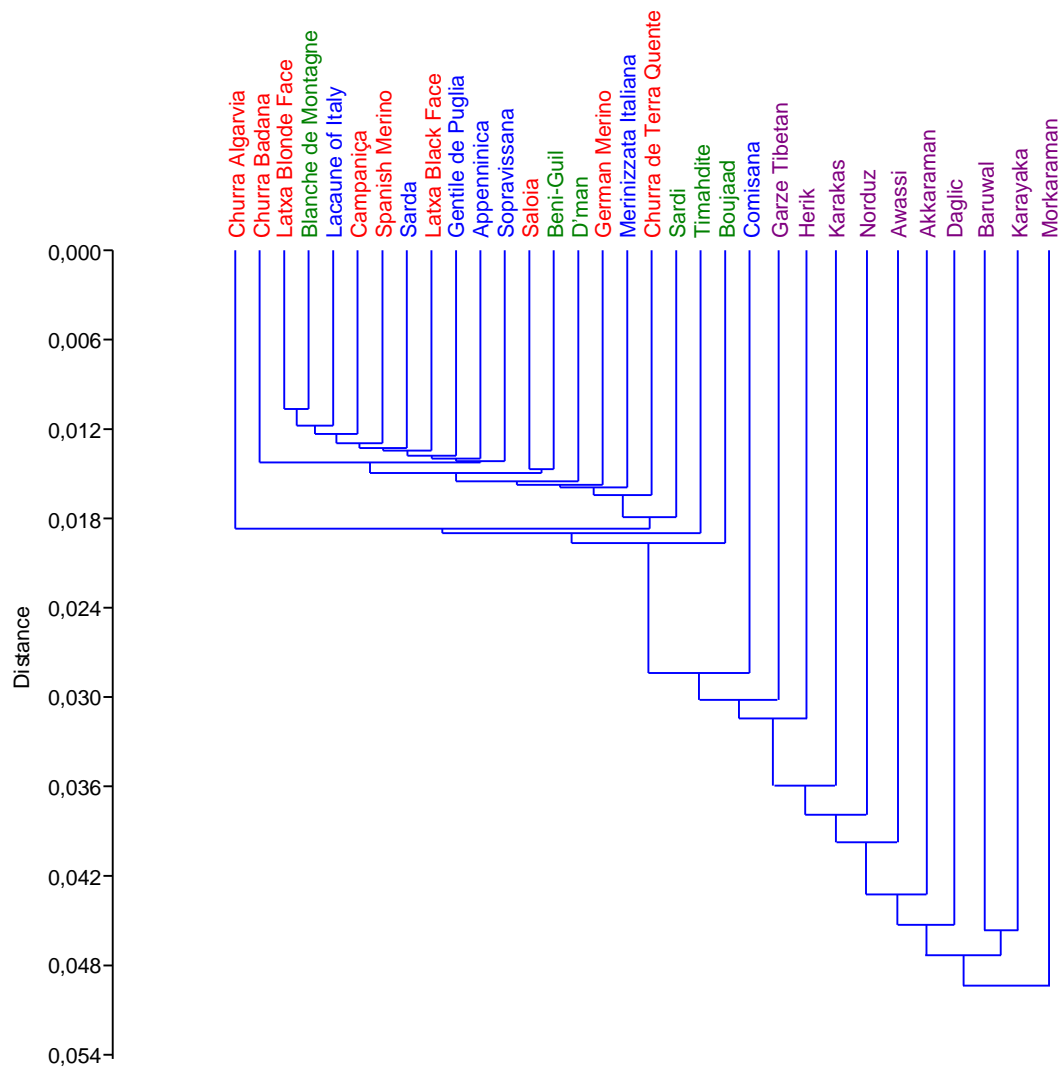

**C:** Cluster Analysis of Dxy genetic distance

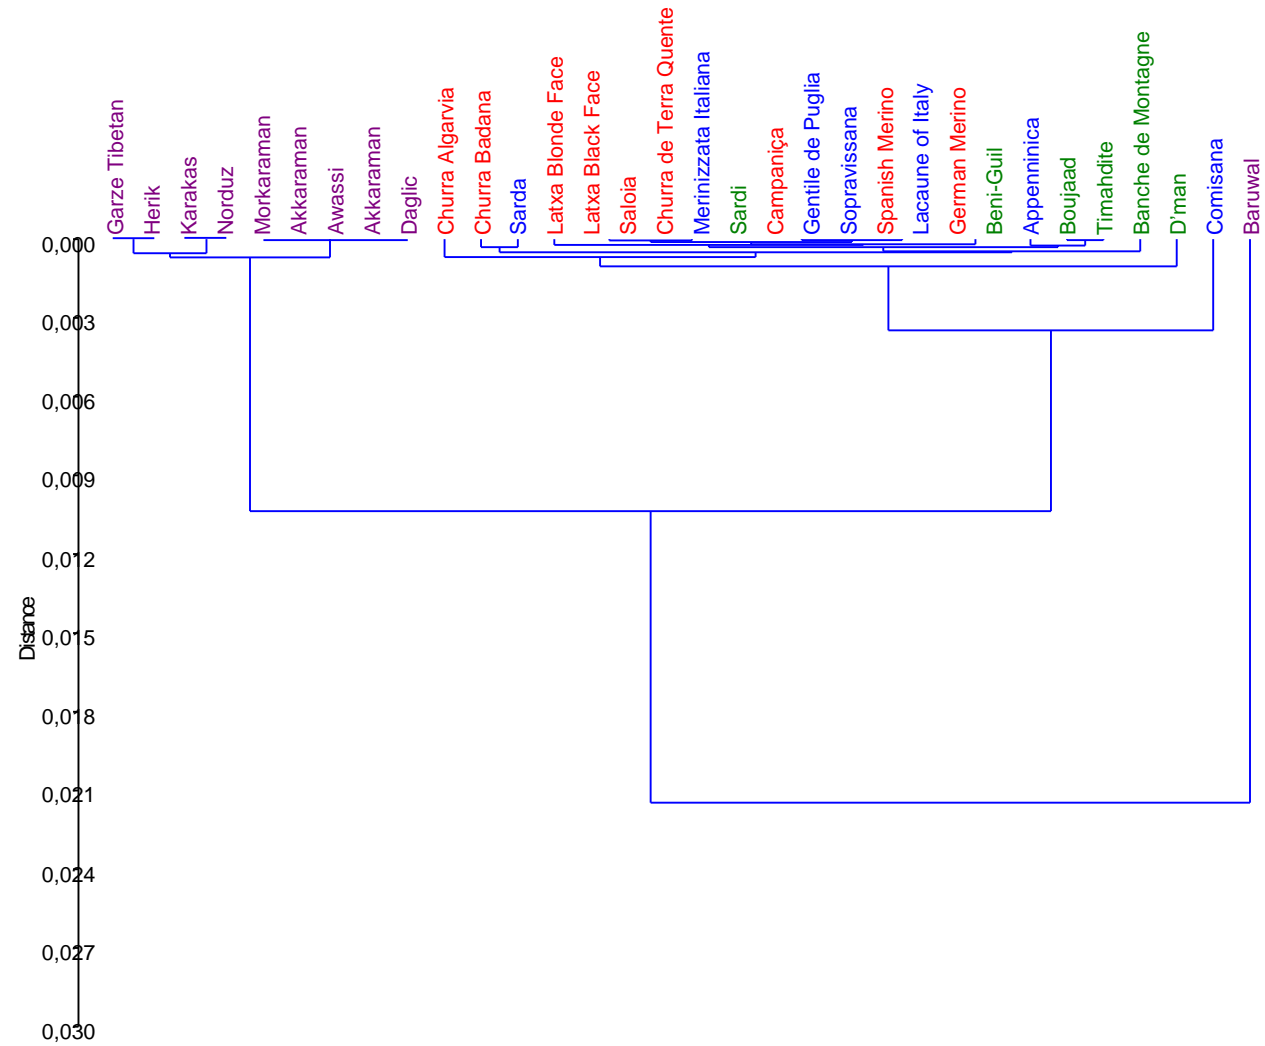

**D:** Cluster Analysis of Da genetic distance

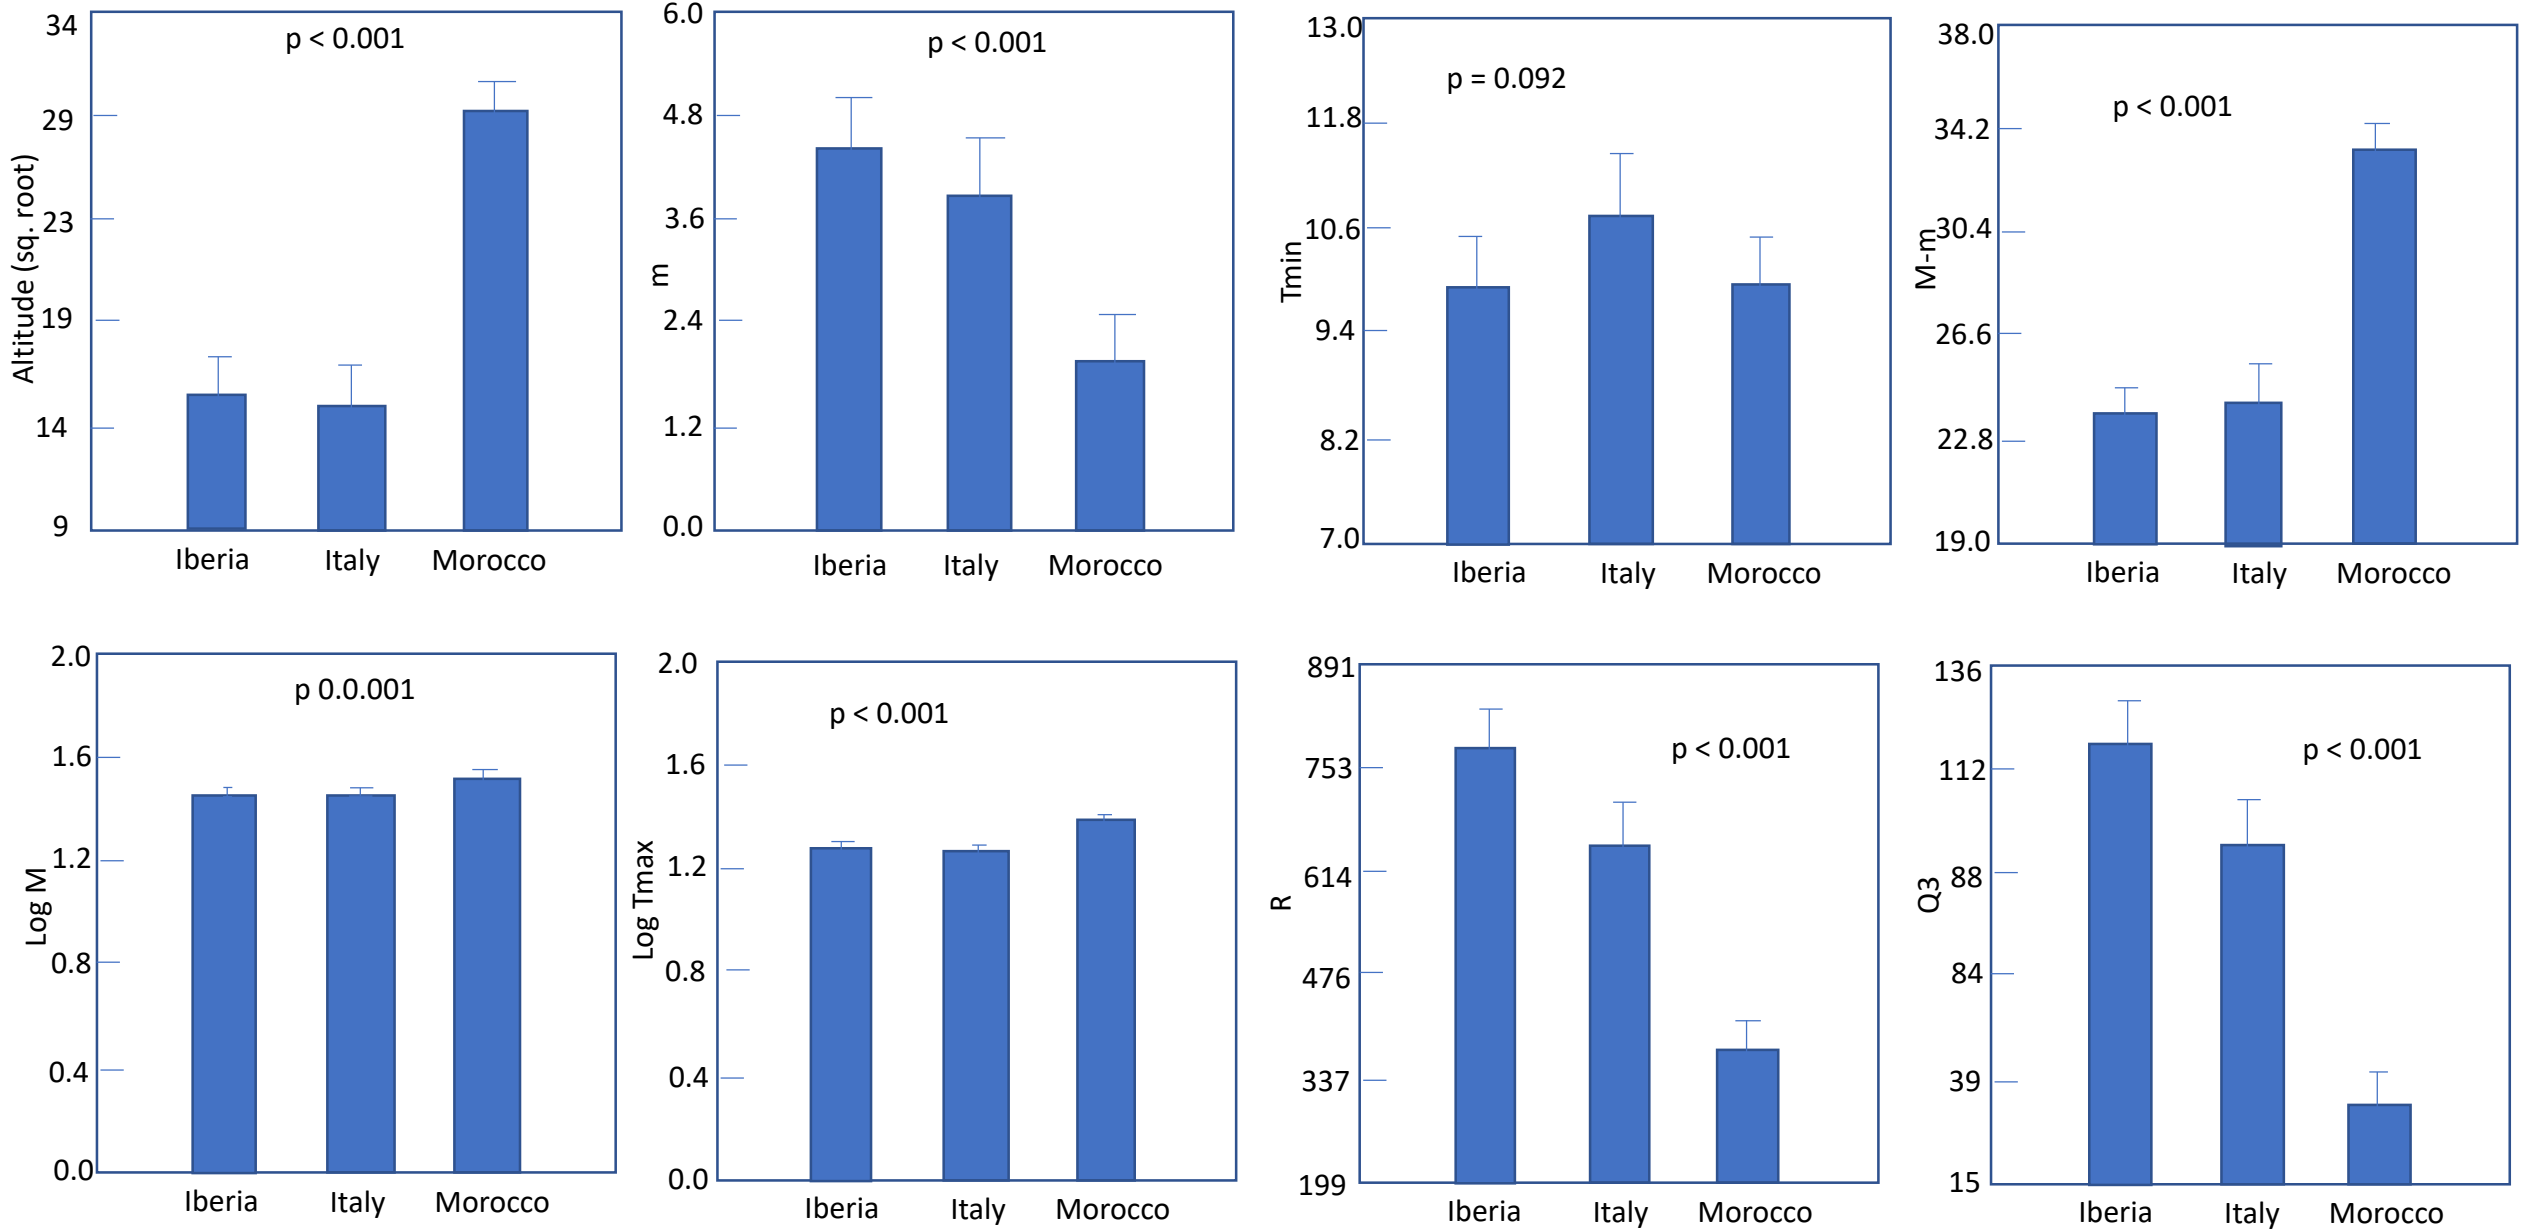

**E:** Variations in climatic parameters according to the three West Mediterranean regions. The p-value are given by ANOVA with 224 localities

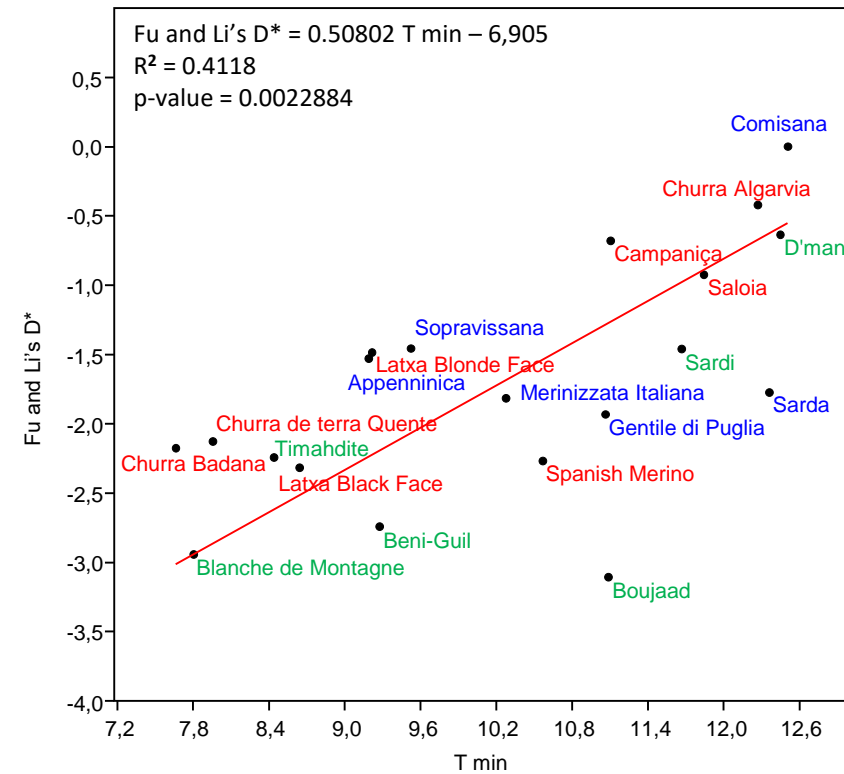

**F:** Relationship between  $T_{\min}$  and Fu and Li's  $D^*$

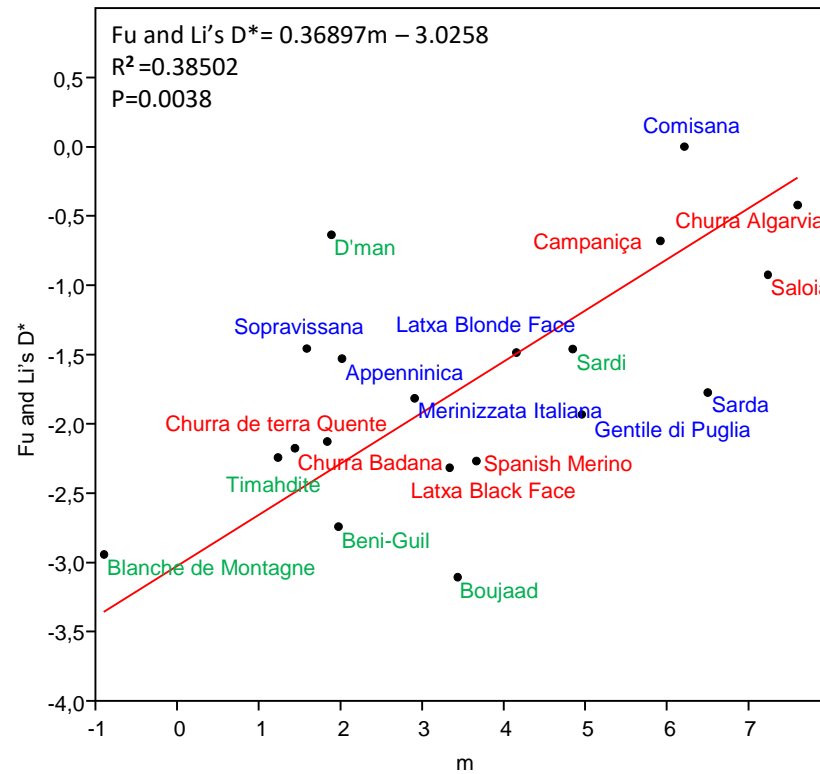

**G:** Relationship between  $m$  and Fu and Li's  $D^*$  (log transformed)

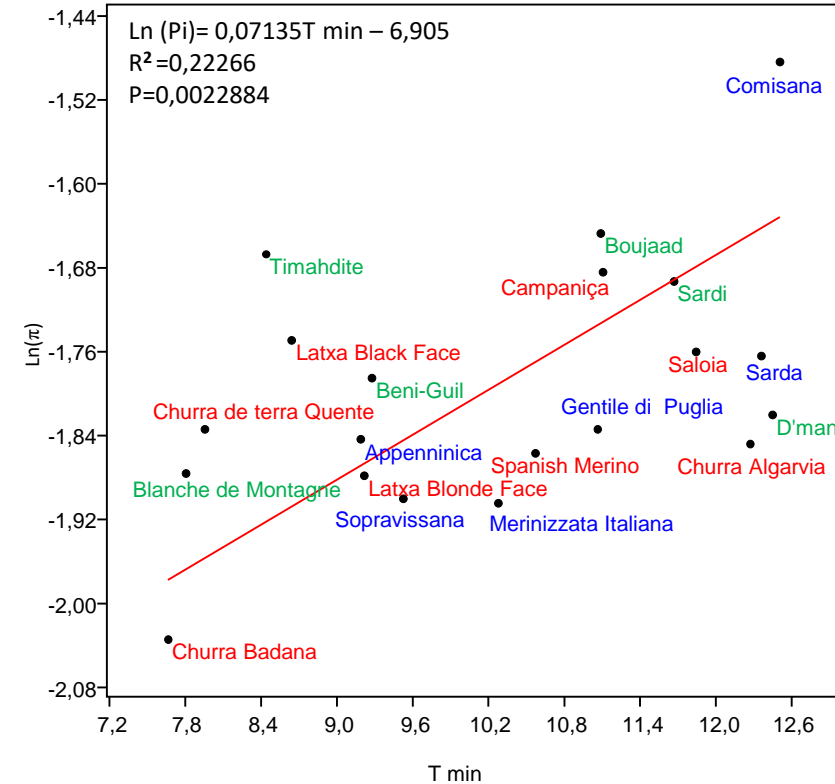

**H:** Relationship between  $T_{\min}$  and  $\pi$  (log transformed)

Moroccan group 1

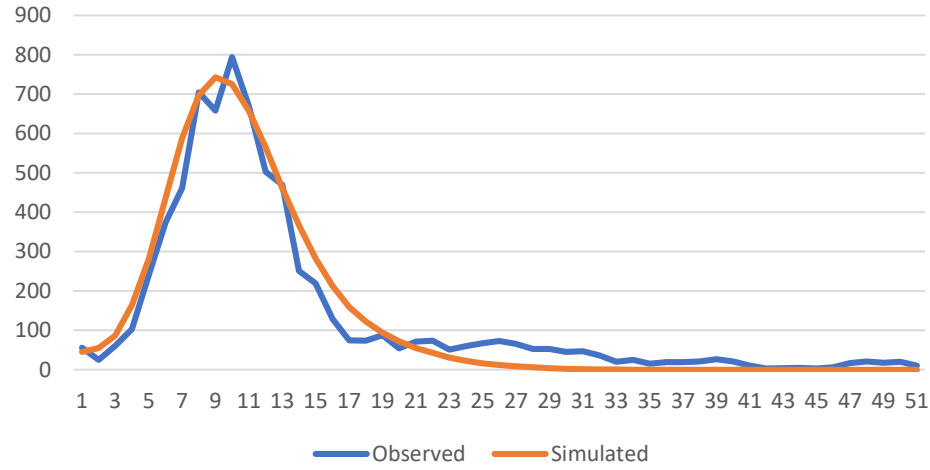

Moroccan group 2

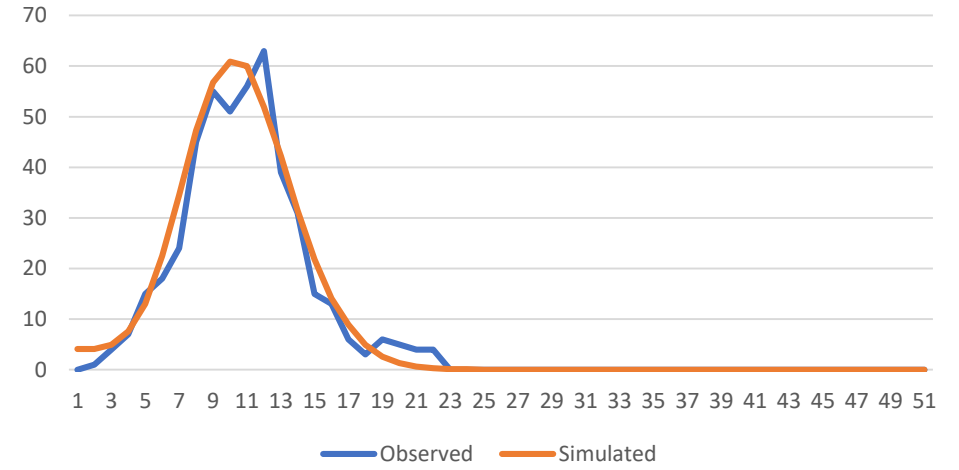

Iberian group

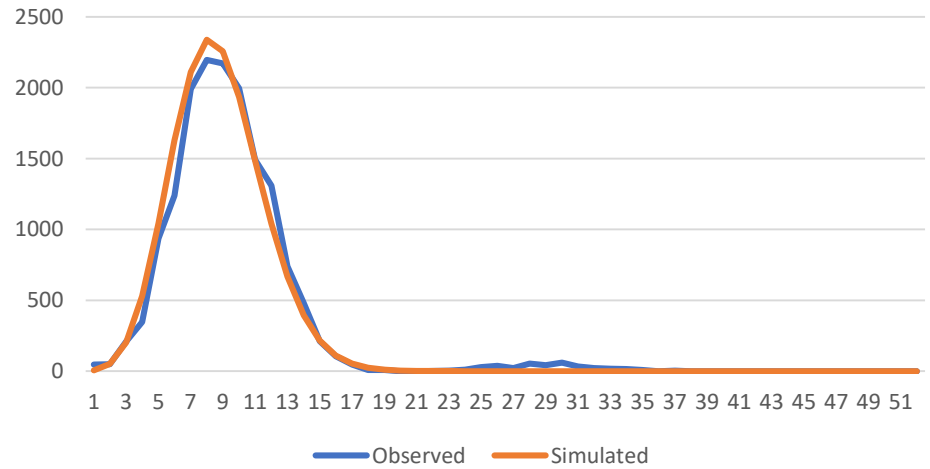

Italian group

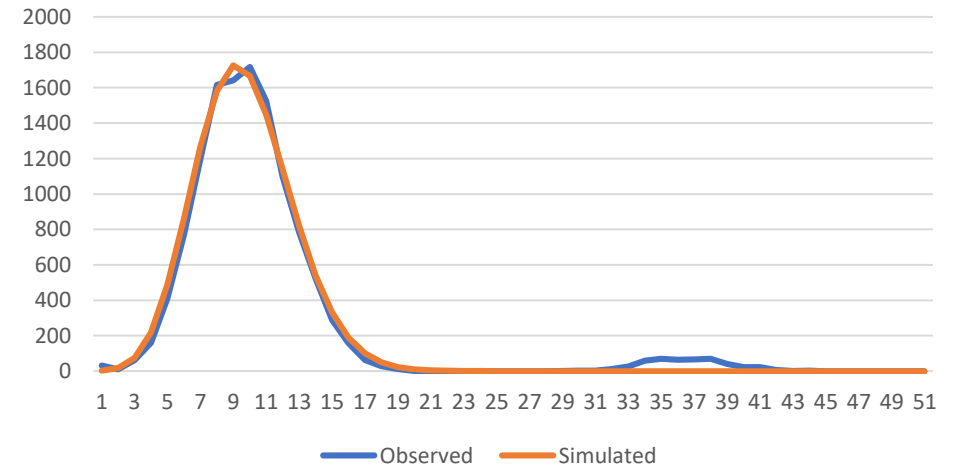

I: Mismatch Analysis for the groups of haplogroup B



Boujaad

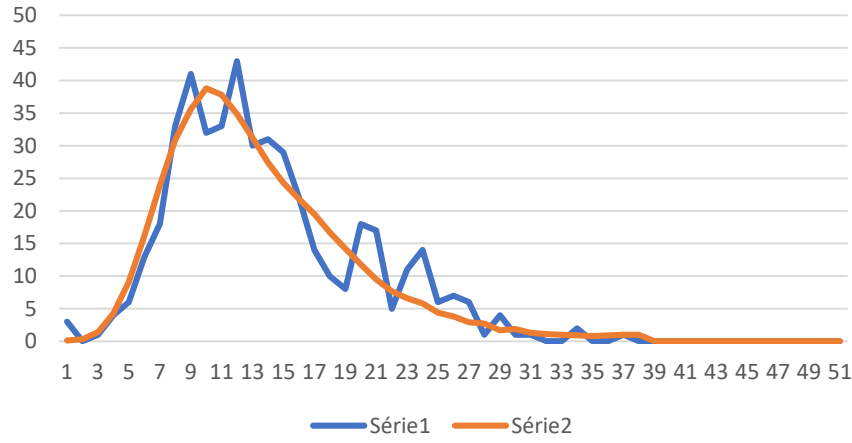

Blanche de Montagne

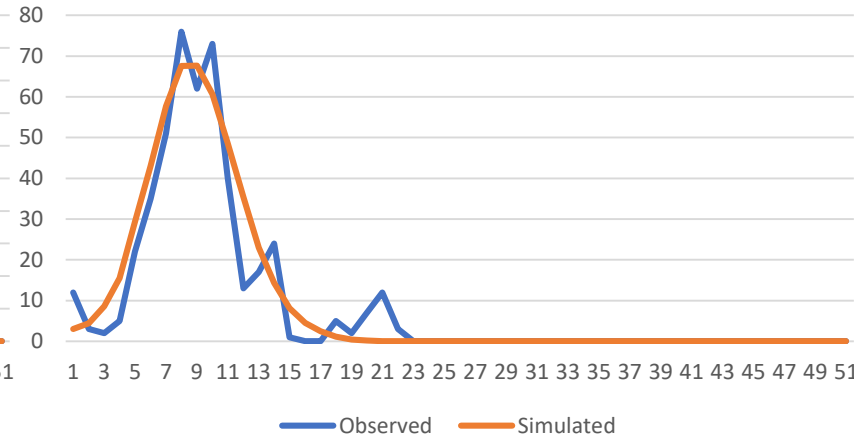

Beni-Guil

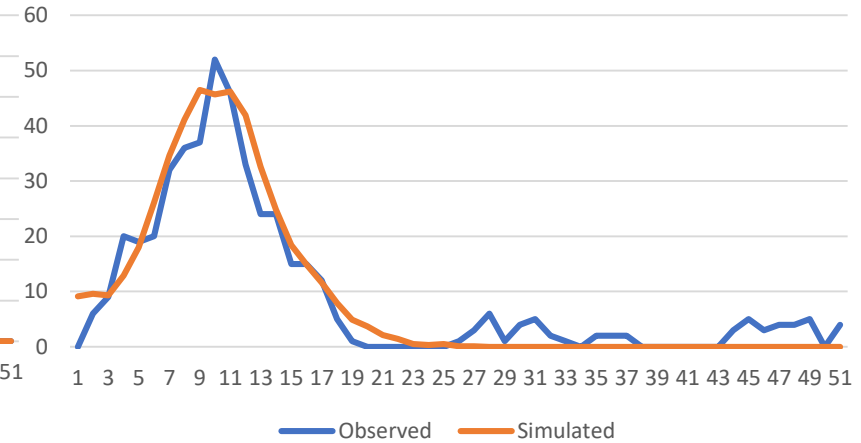

Titre du graphique

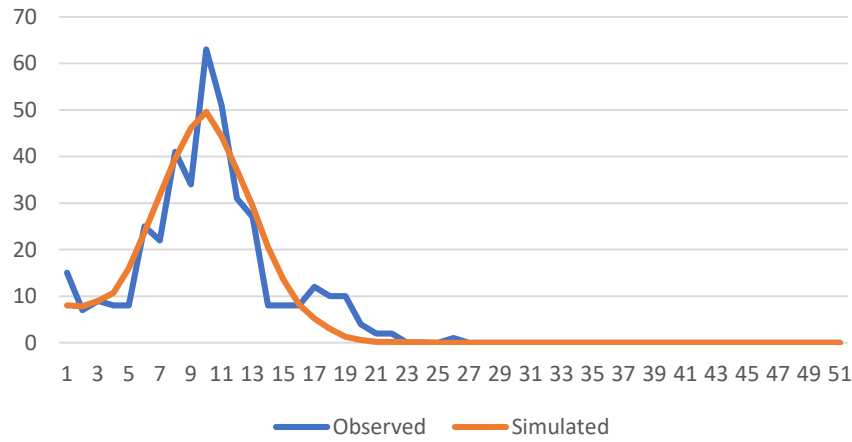

Sardi

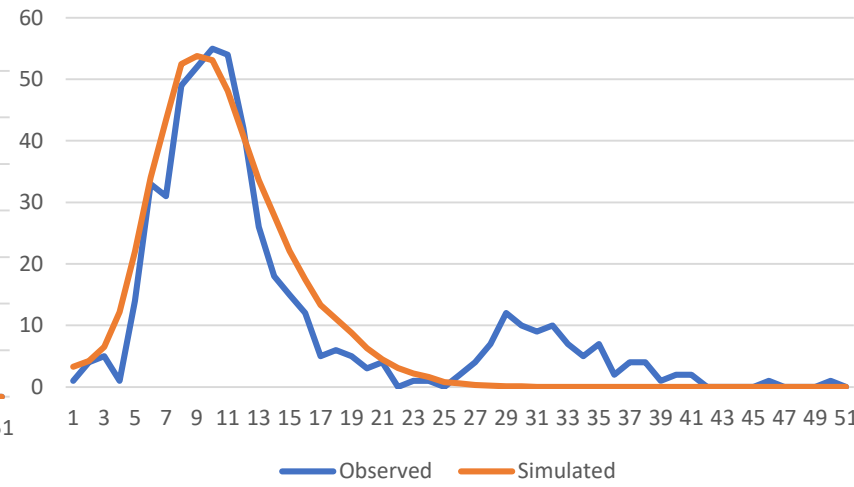

Titre du graphique

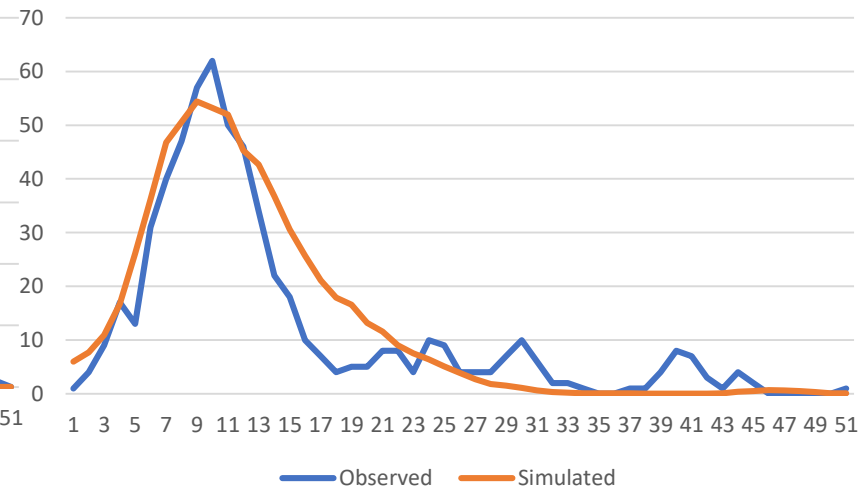

### J: Mismatch Analysis for Moroccan breeds

## Supplementary Data S4: Supplementary text

Suppl. S4. A. AMOVA results of the Moroccan, Iberian and Italian breed groups combinations comparisons.

|                | Among groups | Among populations within groups | Within populations |
|----------------|--------------|---------------------------------|--------------------|
| Morocco/Iberia | 2.05***      | 0.67*                           | 97.28***           |
| Morocco/Italy  | 2.18***      | 1.64**                          | 96.18***           |
| Italy/Iberia   | -0.26        | 3.26***                         | 97***              |

Suppl. S4. B. Genetic diversity parameters and Fu's F statistics in analyzed Moroccan sheep breeds.

| Breed               | N <sup>a</sup> | H <sub>n</sub> <sup>b</sup> | H <sub>d</sub> <sup>c</sup> ± (SD) | Π <sup>d</sup> ± (SD) | S <sup>e</sup> | P <sup>f</sup> | S <sub>g</sub> <sup>g</sup> | Fu Li F* | Fu Li D* | Fu's Fs    | T <sup>h</sup> | Shannon | Haplogroup membership (%) |        |       |    |    |
|---------------------|----------------|-----------------------------|------------------------------------|-----------------------|----------------|----------------|-----------------------------|----------|----------|------------|----------------|---------|---------------------------|--------|-------|----|----|
|                     |                |                             |                                    |                       |                |                |                             |          |          |            |                |         | HA                        | HB     | HC    | HD | HE |
| Blanche de Montagne | 32             | 24                          | 0.970 ± (0.019)                    | 0.013 ± (0.002)       | 44             | 16             | 28                          | -3.016*  | -2.943*  | -13.240*** | -1.766         | 0.139   | 0                         | 96.875 | 3.125 | 0  | 0  |
| Boujaad             | 31             | 29                          | 0.994 ± (0.011)                    | 0.023 ± (0.002)       | 91             | 30             | 61                          | -3.280** | -3.105*  | -18.224*** | -2.111*        | 0.239   | 0                         | 93.548 | 6.452 | 0  | 0  |
| Beni-Guil           | 31             | 29                          | 0.996 ± (0.009)                    | 0.016 ± (0.003)       | 66             | 24             | 42                          | -2.091*  | -2.741*  | -22.713*** | -1.953*        | 0.143   | 3.226                     | 96.774 | 0     | 0  | 0  |
| D'man               | 29             | 21                          | 0.963 ± (0.023)                    | 0.015 ± (0.001)       | 41             | 14             | 27                          | -0.880   | -1.457   | -7.424*    | -1.744         | 0.000   | 0                         | 100    | 0     | 0  | 0  |
| Sardi               | 33             | 30                          | 0.994 ± (0.009)                    | 0.020 ± (0.003)       | 76             | 42             | 34                          | -1.821   | -2.242   | -18.582*** | -1.692         | 0.229   | 6.060                     | 93.940 | 0     | 0  | 0  |
| Timahdite           | 37             | 32                          | 0.988 ± (0.011)                    | 0.022 ± (0.003)       | 56             | 27             | 29                          | -2.502   | -0.679   | -25.845*** | -1.855*        | 0.281   | 0                         | 91.892 | 8.108 | 0  | 0  |

\* p < 0.05; \*\* p < 0.01. <sup>a</sup> Number of sequences. <sup>b</sup> Observed haplotypes (H<sub>n</sub>). <sup>c</sup> Haplotype diversity (H<sub>d</sub>). <sup>d</sup> Nucleotide diversity (Π). <sup>e</sup> Segregated sites (S). <sup>f</sup> Phylogenetically informative sites (P). <sup>g</sup> Singletons (S<sub>g</sub>). <sup>h</sup> Tajima's D test.

The four breeds of North Morocco (Boujaad, Timahdite, Sardi and Beni-Guil) present the highest value of haplotypic and nucleotidic diversities (H<sub>d</sub>, and π respectively). As regard haplogroup diversity measured by Shannon index, the D'man present the lowest value, followed by Blanche de Montagne and Beni-Guil. The neutrality test Fu's Fs indicates highly significant departure from neutrality for all the breeds, except for the D'man where its significant is moderate. Broadly speaking, Blanche de Montagne, Boujaad and Beni-Guil show significant value of Fu and Li F\* and D\*, and Tajima test

### Suppl. S4.C. PCR amplification and sequencing of the mitochondrial DNA D-loop region.

The three primers used for both polymerase chain reaction (PCR) and sequencing of the D-loop region are indicated in Table 1. These primers were designed using the software Primer3 (at primer3.ut.ee), starting from the complete mtDNA sequence of reference *Ovis aries* in GenBank (NC\_001941.1). The first couple D1F/D1R allows the amplification of the first 655pb of mtDNA control region from 15391 to 16046, and the CR1F/D1R one allows the amplification of 634 pb from 15412 to 16046 (Suppl. S4.C. Table 1). Amplification reactions were carried out in a final volume of 20  $\mu$ L PCR mix containing 70-80 ng of genomic DNA, 4  $\mu$ l of buffer (High-Fidelity), 200  $\mu$ M of each deoxynucleotide triphosphate (dATP, dCTP, dGTP and dTTP), 10 pmol of each primer and finally 0.2  $\mu$ l of Taq polymerase (Phusion High-Fidelity from ThermoFisher scientific, Waltham, MA, USA). PCR thermal conditions were specified in Suppl. S4.C. Table 2. PCR products were checked by 1.5% agarose gel electrophoresis stained with ethidium bromide. Amplicons were treated with ExoSAP-IT in order to purified them from remaining dNTP and primers, as per manufactures instructions (ThermoFisher scientific, Waltham, MA, USA). Sequencing reactions were conducted using Big-Dye Terminator Cycle Sequencing kit (Applied Biosystems) according to the thermal conditions summarized in Suppl. S4.C. Table 3. The products were purified on Sephadex Columns (Sephadex™ LH-20, Sigma-Aldrich, Saint-Louis, MO, USA). Purified products were analyzed in ABI Prism 3100 Genetic Analyzer (Applied Biosystems).

**Suppl. S4.C. Table 1:** Primers used for the amplification and sequencing of the D-loop of Moroccan sheep.

| Primer name | Primer sequence                       | Reference                                              |
|-------------|---------------------------------------|--------------------------------------------------------|
| <b>D1F</b>  | <b>Forward</b> CCCCACTATCAACACCCAAAGC | Designed according to the NCBI sequence No.NC_001941.1 |
| <b>CR1F</b> | <b>Forward</b> AGTTCTACTTAACTATTCCCTG |                                                        |
| <b>D1R</b>  | <b>Reverse</b> CAGGATACGCATGTTGACTAGA |                                                        |

**Suppl. S4.C. Table 2:** PCR cycling conditions used for the amplification of the control region of sheep.

| Step                        | Primer couple |        |              |          |        |              |
|-----------------------------|---------------|--------|--------------|----------|--------|--------------|
|                             | D1F/D1R       |        |              | CR1F/D1R |        |              |
|                             | Temp[°C]      | Time   | N° of cycles | Temp[°C] | Time   | N° of cycles |
| <b>Initial denaturation</b> | 98            | 30 s   | 1            | 98       | 30 s   | 1            |
| <b>Denaturation</b>         | 98            | 10 s   |              | 98       | 10 s   |              |
| <b>Annealing</b>            | 67.5          | 30 s   | 35           | 60.8     | 30 s   | 35           |
| <b>Elongation</b>           | 72            | 20 s   |              | 72       | 20 s   |              |
| <b>Final elongation</b>     | 72            | 10 min | 1            | 72       | 10 min | 1            |

**Suppl. S4.C. Table 3:** Sequencing PCR conditions.

| Step                        | Temp[°C] | Time  | N° of cycle |
|-----------------------------|----------|-------|-------------|
| <b>Initial denaturation</b> | 94       | 4 min | 1           |
| <b>Denaturation</b>         | 96       | 10 s  |             |
| <b>Annealing</b>            | 58       | 5 s   | 25          |
| <b>Elongation</b>           | 60       | 4 min |             |

**Suppl. S4.D. Newick-Extra details.**

To briefly explain our strategy, let's imagine an ancestral population composed by individuals belonging to two haplogroups A and B, including for example the individuals "a" and "b" belonging to the haplogroups A and B, respectively. It was assumed that this population split into subpopulations 1 and 2 containing the progeny a1 b1 and a2 b2, respectively. The individuals a1 and a2 share mutations acquired by their ancestor a, and ditto for b1 and b2. To quantify the proximity between subpopulations, we took into account the number of sister sequences retrieved in each pairwise combination, using the information contained in the topology of a phylogenetic tree. In order to entirely explore the phylogenetic tree, we constructed a program that (i) reads the topology expressed in the parenthesis tree (Newick) and (ii) records all the common points between the breeds in any combination, at the level of the terminal branches, and (iii) summarizes the data in an Excel™ table. For example, in the simple parenthesis tree of figure 1 (A, B, C), (D, E), we retained the following information: A has one point in common with B and C, and ditto for B and C, and D and E. This program named Newick-Extra, written in R is available on request to the authors. Two levels of proximity have been considered. The first one corresponds to strict sister sequences (terminal branches), and the second one to two series of embedded sequences. The matrix gives for each breed pair the number of similarities that was later transformed into their proportions, giving an asymmetric matrix. This last one can be treated by distance measures applied to ordered variables.

**Suppl. S4.D. Figure 1:** Counting the two levels of connection numbers.

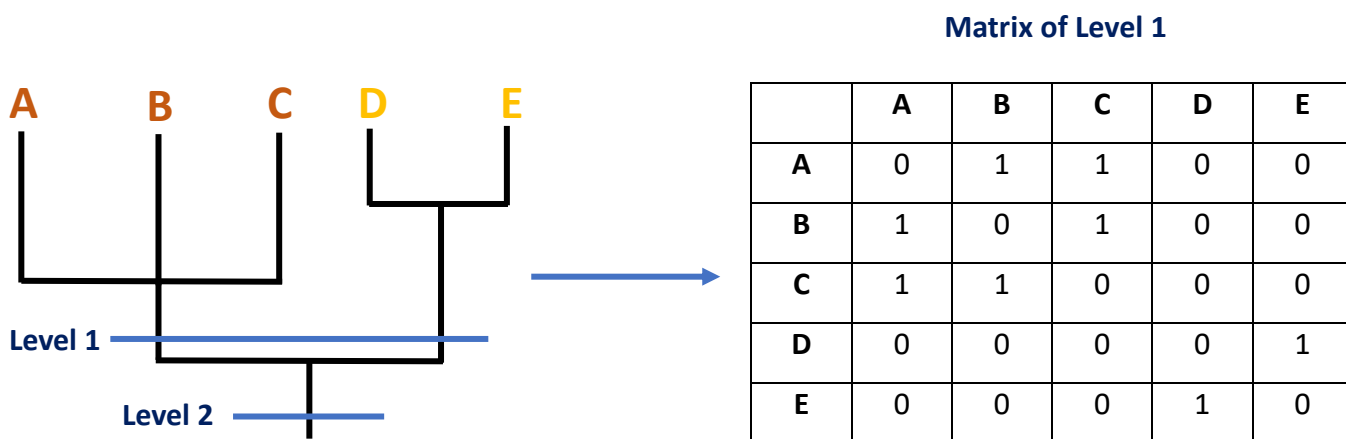

**Matrix of Level 2**

|   | A | B | C | D | E |
|---|---|---|---|---|---|
| A | 0 | 1 | 1 | 1 | 1 |
| B | 1 | 0 | 1 | 1 | 1 |
| C | 1 | 1 | 0 | 1 | 1 |
| D | 1 | 1 | 1 | 0 | 1 |
| E | 1 | 1 | 1 | 1 | 0 |

It should be noted that the treatment of the topology information at the level 2 produced a new table of affinities between breeds (data not shown) that generated a Cluster analysis in which the Moroccan breeds are scattered in three groups: among Italian and Iberian breeds. As a result, the level 2 gives a confusing view relatively to the Network analysis.
